# Supplementary material
Source: publisher figshare collection journal article supplement (https://wiley.figshare.com/ndownloader/files/33828002)
Supplement: Supplementary file 1 [file 33828002]

## Sheet: qPCR
Exposure at 2dpf		100 ng/L
	Gene	Control												Treatment-100ng/L												Control vs Treatment-100ng/L
		Target Gene			Reference Gene (β-actin)			ΔCt						Target Gene			Reference Gene (β-actin)			ΔCt						Independent t test								Fold change
No.		Ct-1	Ct-2	Ct-3	Ct-1	Ct-2	Ct-3	ΔCt-1C	ΔCt-2C	ΔCt-3C	ΔCt-C-A	ΔCt-C-SD		Ct-1	Ct-2	Ct-3	Ct-1	Ct-2	Ct-3	ΔCt-1T	ΔCt-2T	ΔCt-3T	ΔCt-T-A	ΔCt-T-SD		p		‒ΔΔCt-1	‒ΔΔCt-2	‒ΔΔCt-3	‒ΔΔCt-A	‒ΔΔCt-SD		2‒ΔΔCt-1	2‒ΔΔCt-2	2‒ΔΔCt-3	2‒ΔΔCt-A	2‒ΔΔCt-SD
1	mprα	28.77	28.78	28.73	20.29	20.26	20.26	8.48	8.52	8.47	8.49	0.0216025		29.68	29.63	29.69	22.25	21.63	21.8	7.43	8	7.89	7.77333	0.246892		0.05352		1.05	0.52	0.58	0.716667	0.236972		2.07053	1.43396	1.49485	1.66644	0.286811
2	mprβ	30.56	30.47	31.28	20.29	20.26	20.26	10.27	10.21	11.02	10.5	0.368511		31.43	31.48	31.67	22.25	21.63	21.8	9.18	9.85	9.87	9.63333	0.320659		0.066123		1.09	0.36	1.15	0.866667	0.359104		2.12874	1.28343	2.21914	1.8771	0.421411
3	esr2a	30.56	29.72	30.21	20.29	20.26	20.26	10.27	9.46	9.95	9.89333	0.3331		30.93	31.14	30.93	22.25	21.63	21.8	8.68	9.51	9.13	9.10667	0.339248		0.079382		1.59	-0.05	0.82	0.786667	0.669942		3.01049	0.965936	1.76541	1.91395	0.841269
4	esr2b	29.36	29.22	29.12	20.29	20.26	20.26	9.07	8.96	8.86	8.96333	0.0857645		31.18	31.45	31.41	22.25	21.63	21.8	8.93	9.82	9.61	9.45333	0.379854		0.149772		0.14	-0.86	-0.75	-0.49	0.447735		1.10191	0.550953	0.594604	0.749154	0.250069
5	cyp19a1b	31.2	31.02	31.05	20.29	20.26	20.26	10.91	10.76	10.79	10.82	0.0648074		33.58	33.06	33.16	22.25	21.63	21.8	11.33	11.43	11.36	11.3733	0.0418994		0.000533	***	-0.42	-0.67	-0.57	-0.553333	0.10274		0.747425	0.628507	0.673617	0.683183	0.049017
6	clock1a	27.55	27.55	27.52	20.29	20.26	20.26	7.26	7.29	7.26	7.27	0.0141421		28.8	28.71	28.58	22.25	21.63	21.8	6.55	7.08	6.78	6.80333	0.217		0.038595	*	0.71	0.21	0.48	0.466667	0.204342		1.6358	1.15669	1.39474	1.39575	0.1956
7	clock1b	29.31	29.42	29.18	20.29	20.26	20.26	9.02	9.16	8.92	9.03333	0.0984322		31.21	31.89	31.4	22.25	21.63	21.8	8.96	10.26	9.6	9.60667	0.530744		0.207489		0.06	-1.1	-0.68	-0.573333	0.479537		1.04247	0.466516	0.624165	0.711049	0.243024
8	clock2	29.05	28.74	29.62	20.29	20.26	20.26	8.76	8.48	9.36	8.86667	0.367091		29.85	29.91	29.83	22.25	21.63	21.8	7.6	8.28	8.03	7.97	0.280832		0.051713		1.16	0.2	1.33	0.896667	0.497483		2.23457	1.1487	2.51403	1.96577	0.588911
9	arntl1a	27.61	28.01	27.53	20.29	20.26	20.26	7.32	7.75	7.27	7.44667	0.215458		28.87	28.64	28.56	22.25	21.63	21.8	6.62	7.01	6.76	6.79667	0.161314		0.026897	*	0.7	0.74	0.51	0.65	0.100333		1.6245	1.67018	1.42405	1.57291	0.106899
10	arntl1b	30.6	30.45	30.46	20.29	20.26	20.26	10.31	10.19	10.2	10.2333	0.054365		31.98	30.92	31.34	22.25	21.63	21.8	9.73	9.29	9.54	9.52	0.180185		0.005846	**	0.58	0.9	0.66	0.713333	0.135974		1.49485	1.86607	1.58008	1.647	0.158764
11	arntl2	32.39	32.52	32.87	20.29	20.26	20.26	12.1	12.26	12.61	12.3233	0.212968		35.09	33.7	34.22	22.25	21.63	21.8	12.84	12.07	12.42	12.4433	0.314784		0.678326		-0.74	0.19	0.19	-0.12	0.438406		0.598739	1.14076	1.14076	0.960089	0.255513
12	nr1d1	34.21	34.12	34.27	20.29	20.26	20.26	13.92	13.86	14.01	13.93	0.0616441		38.52	38.23	38.36	22.25	21.63	21.8	16.27	16.6	16.56	16.4767	0.147045		2.3e-05	***	-2.35	-2.74	-2.55	-2.54667	0.159234		0.196146	0.149685	0.170755	0.172195	0.018995
13	nr1d2a	35.28	34.18	34.16	20.29	20.26	20.26	14.99	13.92	13.9	14.27	0.509182		36.02	36.83	35.26	22.25	21.63	21.8	13.77	15.2	13.46	14.1433	0.757819		0.854015		1.22	-1.28	0.44	0.126667	1.04439		2.32947	0.411796	1.3566	1.36596	0.782914
14	nr1d2b	31.62	31.38	31.65	20.29	20.26	20.26	11.33	11.12	11.39	11.28	0.115758		32.56	32.96	32.76	22.25	21.63	21.8	10.31	11.33	10.96	10.8667	0.421611		0.252202		1.02	-0.21	0.43	0.413333	0.502284		2.02792	0.864537	1.34723	1.41323	0.477236
15	per1a	31.45	31.29	31.21	20.29	20.26	20.26	11.16	11.03	10.95	11.0467	0.0865384		33.11	33.96	32.69	22.25	21.63	21.8	10.86	12.33	10.89	11.36	0.686003		0.585466		0.3	-1.3	0.06	-0.313333	0.704525		1.23114	0.406126	1.04247	0.893245	0.352953
16	per1b	29.31	29.2	29.32	22.37	22.15	22.02	6.94	7.05	7.3	7.09667	0.150628		31.44	31.64	31.4	24.34	23.96	23.89	7.1	7.68	7.51	7.43	0.243447		0.174973		-0.16	-0.63	-0.21	-0.333333	0.210766		0.895025	0.646176	0.864537	0.801913	0.110823
17	per2	30.21	30.55	30.26	22.37	22.15	22.02	7.84	8.4	8.24	8.16	0.235514		32.05	32.43	32.32	24.34	23.96	23.89	7.71	8.47	8.43	8.20333	0.349221		0.891361		0.13	-0.07	-0.19	-0.0433333	0.131993		1.09429	0.952638	0.876606	0.974512	0.0902067
18	per3	36.31	36.61	36.74	22.37	22.15	22.02	13.94	14.46	14.72	14.3733	0.324277		36.76	38.94	37.1	24.34	23.96	23.89	12.42	14.98	13.21	13.5367	1.07034		0.349724		1.52	-0.52	1.51	0.836667	0.959317		2.86791	0.697372	2.8481	2.13779	1.01856
19	cry1a	30.34	30.53	30.5	22.37	22.15	22.02	7.97	8.38	8.48	8.27667	0.220656		33.21	33.03	32.58	24.34	23.96	23.89	8.87	9.07	8.69	8.87667	0.155206		0.034669	*	-0.9	-0.69	-0.21	-0.6	0.288791		0.535887	0.619854	0.864537	0.673426	0.139416
20	cry1b	34.5	33.36	33.49	22.36	21.8	21.83	12.14	11.56	11.66	11.7867	0.253158		34.45	33.78	33.93	22.87	22.69	22.74	11.58	11.09	11.19	11.2867	0.211397		0.098649		0.56	0.47	0.47	0.5	0.0424264		1.47427	1.38511	1.38511	1.41483	0.0420303
21	cry2a	35.83	35.06	35.33	22.37	22.15	22.02	13.46	12.91	13.31	13.2267	0.23214		34.46	34.59	34.65	24.34	23.96	23.89	10.12	10.63	10.76	10.5033	0.276204		0.000436	***	3.34	2.28	2.55	2.72333	0.449765		10.1261	4.85678	5.85634	6.94639	2.28509
22	cry2b	31.89	32.07	32.02	22.37	22.15	22.02	9.52	9.92	10	9.81333	0.209974		33.02	33.29	32.75	24.34	23.96	23.89	8.68	9.33	8.86	8.95667	0.274024		0.024686	*	0.84	0.59	1.14	0.856667	0.224846		1.79005	1.50525	2.20381	1.83304	0.286803
23	cry3	28.04	27.94	28.06	22.37	22.15	22.02	5.67	5.79	6.04	5.83333	0.154128		30.1	30.27	29.96	24.34	23.96	23.89	5.76	6.31	6.07	6.04667	0.225142		0.330862		-0.09	-0.52	-0.03	-0.213333	0.218225		0.939523	0.697372	0.97942	0.872105	0.124624
24	cry4	33.42	33.87	33.59	22.37	22.15	22.02	11.05	11.72	11.57	11.4467	0.287093		35.56	36.18	35.62	24.34	23.96	23.89	11.22	12.22	11.73	11.7233	0.408276		0.476903		-0.17	-0.5	-0.16	-0.276667	0.157973		0.888843	0.707107	0.895025	0.830325	0.0871649
25	cry5	29.74	29.57	29.44	22.37	22.15	22.02	7.37	7.42	7.42	7.40333	0.0235702		31.18	31.81	31.31	24.34	23.96	23.89	6.84	7.85	7.42	7.37	0.413844		0.914936		0.53	-0.43	3.55271e-15	0.0333333	0.392626		1.44393	0.742262	1	1.06206	0.289797
26	pgr	33.01	32.24	32.93	22.37	22.15	22.02	10.64	10.09	10.91	10.5467	0.341207		33.99	33.6	33.89	24.34	23.96	23.89	9.65	9.64	10	9.76333	0.167398		0.043468	*	0.99	0.45	0.91	0.783333	0.237954		1.98618	1.36604	1.87905	1.74376	0.270644
27	esr1	31.95	31.21	31.26	22.37	22.15	22.02	9.58	9.06	9.24	9.29333	0.215613		32.64	32.64	33.21	24.34	23.96	23.89	8.3	8.68	9.32	8.76667	0.420899		0.190384		1.28	0.38	-0.08	0.526667	0.564821		2.42839	1.30134	0.946058	1.5586	0.631908
28	vtg1	35.22	33.92	34.1	20.62	20.49	20.58	14.6	13.43	13.52	13.85	0.531601		34.84	35.98	36.97	21.75	21.59	21.81	13.09	14.39	15.16	14.2133	0.854257		0.636465		1.51	-0.96	-1.64	-0.363333	1.35342		2.8481	0.514057	0.320856	1.22767	1.14853
29	ar	30.28	30.32	30.25	20.62	20.49	20.58	9.66	9.83	9.67	9.72	0.0778888		32.62	33.01	33.08	21.75	21.59	21.81	10.87	11.42	11.27	11.1867	0.23214		0.001064	**	-1.21	-1.59	-1.6	-1.46667	0.181537		0.432269	0.332171	0.329877	0.364772	0.0477363
30	mr	33.07	33.01	33.61	22.37	22.15	22.02	10.7	10.86	11.59	11.05	0.387384		34.81	34.81	34.21	24.34	23.96	23.89	10.47	10.85	10.32	10.5467	0.22306		0.186514		0.23	0.01	1.27	0.503333	0.549505		1.17283	1.00696	2.41162	1.53047	0.626734
31	gr	29.31	29.2	29.32	22.37	22.15	22.02	6.94	7.05	7.3	7.09667	0.150628		31.44	31.64	31.4	24.34	23.96	23.89	7.1	7.68	7.51	7.43	0.243447		0.174973		-0.16	-0.63	-0.21	-0.333333	0.210766		0.895025	0.646176	0.864537	0.801913	0.110823
32	star	30.21	30.55	30.26	22.37	22.15	22.02	7.84	8.4	8.24	8.16	0.235514		32.05	32.43	32.32	24.34	23.96	23.89	7.71	8.47	8.43	8.20333	0.349221		0.891361		0.13	-0.07	-0.19	-0.0433333	0.131993		1.09429	0.952638	0.876606	0.974512	0.0902067
33	cyp11a1	36.31	36.61	36.74	22.37	22.15	22.02	13.94	14.46	14.72	14.3733	0.324277		36.76	38.94	37.1	24.34	23.96	23.89	12.42	14.98	13.21	13.5367	1.07034		0.349724		1.52	-0.52	1.51	0.836667	0.959317		2.86791	0.697372	2.8481	2.13779	1.01856
34	cyp17a1	30.34	30.53	30.5	22.37	22.15	22.02	7.97	8.38	8.48	8.27667	0.220656		33.21	33.03	32.58	24.34	23.96	23.89	8.87	9.07	8.69	8.87667	0.155206		0.034669	*	-0.9	-0.69	-0.21	-0.6	0.288791		0.535887	0.619854	0.864537	0.673426	0.139416
35	cyp19a1a	38.42	38.68	39.02	22.37	22.15	22.02	16.05	16.53	17	16.5267	0.387843		40.18	37.54	38.72	24.34	23.96	23.89	15.84	13.58	14.83	14.75	0.924374		0.066307		0.21	2.95	2.17	1.77667	1.15266		1.15669	7.72749	4.50023	4.46147	2.68266
36	cyp11b	35.83	35.06	35.33	22.37	22.15	22.02	13.46	12.91	13.31	13.2267	0.23214		34.46	34.59	34.65	24.34	23.96	23.89	10.12	10.63	10.76	10.5033	0.276204		0.000436	***	3.34	2.28	2.55	2.72333	0.449765		10.1261	4.85678	5.85634	6.94639	2.28509
37	hsd3b	31.89	32.07	32.02	22.37	22.15	22.02	9.52	9.92	10	9.81333	0.209974		33.02	33.29	32.75	24.34	23.96	23.89	8.68	9.33	8.86	8.95667	0.274024		0.024686	*	0.84	0.59	1.14	0.856667	0.224846		1.79005	1.50525	2.20381	1.83304	0.286803
38	hsd20b	28.04	27.94	28.06	22.37	22.15	22.02	5.67	5.79	6.04	5.83333	0.154128		30.1	30.27	29.96	24.34	23.96	23.89	5.76	6.31	6.07	6.04667	0.225142		0.330862		-0.09	-0.52	-0.03	-0.213333	0.218225		0.939523	0.697372	0.97942	0.872105	0.124624
39	hsd17b3	33.42	33.87	33.59	22.37	22.15	22.02	11.05	11.72	11.57	11.4467	0.287093		35.56	36.18	35.62	24.34	23.96	23.89	11.22	12.22	11.73	11.7233	0.408276		0.476903		-0.17	-0.5	-0.16	-0.276667	0.157973		0.888843	0.707107	0.895025	0.830325	0.0871649
40	hsd11b2	29.74	29.57	29.44	22.37	22.15	22.02	7.37	7.42	7.42	7.40333	0.0235702		31.18	31.81	31.31	24.34	23.96	23.89	6.84	7.85	7.42	7.37	0.413844		0.914936		0.53	-0.43	3.55271e-15	0.0333333	0.392626		1.44393	0.742262	1	1.06206	0.289797
41	gnrh2	33.01	32.24	32.93	22.37	22.15	22.02	10.64	10.09	10.91	10.5467	0.341207		33.99	33.6	33.89	24.34	23.96	23.89	9.65	9.64	10	9.76333	0.167398		0.043468	*	0.99	0.45	0.91	0.783333	0.237954		1.98618	1.36604	1.87905	1.74376	0.270644
42	gnrh3	31.95	31.21	31.26	22.37	22.15	22.02	9.58	9.06	9.24	9.29333	0.215613		32.64	32.64	33.21	24.34	23.96	23.89	8.3	8.68	9.32	8.76667	0.420899		0.190384		1.28	0.38	-0.08	0.526667	0.564821		2.42839	1.30134	0.946058	1.5586	0.631908
43	fshb	38.84	37.83	39.02	20.62	20.49	20.58	18.22	17.34	18.44	18	0.475254		38.28	37.89	36.82	21.75	21.59	21.81	16.53	16.3	15.01	15.9467	0.668946		0.02404	*	1.69	1.04	3.43	2.05333	1.00897		3.22657	2.05623	10.7779	5.35355	3.86521
44	lhb	38.21	39.29	36.87	20.62	20.49	20.58	17.59	18.8	16.29	17.56	1.02492		38.03	37.26	36.57	21.75	21.59	21.81	16.28	15.67	14.76	15.57	0.624553		0.078962		1.31	3.13	1.53	1.99	0.81109		2.47942	8.75435	2.88786	4.70721	2.86662
45	crh	33.07	33.01	33.61	22.37	22.15	22.02	10.7	10.86	11.59	11.05	0.387384		34.81	34.81	34.21	24.34	23.96	23.89	10.47	10.85	10.32	10.5467	0.22306		0.186514		0.23	0.01	1.27	0.503333	0.549505		1.17283	1.00696	2.41162	1.53047	0.626734
46	pomc	32.83	32.2	32.12	20.62	20.49	20.58	12.21	11.71	11.54	11.82	0.284371		32.9	33.13	33.44	21.75	21.59	21.81	11.15	11.54	11.63	11.44	0.208327		0.202072		1.06	0.17	-0.09	0.38	0.492409		2.08493	1.12506	0.939523	1.38317	0.501967
47	trh	35.3	35.45	35.05	20.62	20.49	20.58	14.68	14.96	14.47	14.7033	0.200721		36.21	36.41	37.1	21.75	21.59	21.81	14.46	14.82	15.29	14.8567	0.339837		0.611954		0.22	0.14	-0.82	-0.153333	0.472535		1.16473	1.10191	0.566442	0.94436	0.268457
48	tshb	32.07	31.69	31.47	20.62	20.49	20.58	11.45	11.2	10.89	11.18	0.229056		32.61	32.61	32.19	21.75	21.59	21.81	10.86	11.02	10.38	10.7533	0.271948		0.164926		0.59	0.18	0.51	0.426667	0.177451		1.50525	1.13288	1.42405	1.35406	0.15987
49	nis	35.38	33.64	35.06	20.62	20.49	20.58	14.76	13.15	14.48	14.13	0.702329		35.74	36.23	35.71	21.75	21.59	21.81	13.99	14.64	13.9	14.1767	0.32968		0.936299		0.77	-1.49	0.58	-0.0466667	1.02353		1.70527	0.356013	1.49485	1.18538	0.592708
50	tg	32.3	32.42	32.35	20.62	20.49	20.58	11.68	11.93	11.77	11.7933	0.103387		34.6	34.3	34.93	21.75	21.59	21.81	12.85	12.71	13.12	12.8933	0.170163		0.001448	**	-1.17	-0.78	-1.35	-1.1	0.237908		0.444421	0.582367	0.392292	0.473027	0.0801906
51	dio1	30.94	30.44	30.84	20.62	20.49	20.58	10.32	9.95	10.26	10.1767	0.162138		30.92	30.72	30.77	21.75	21.59	21.81	9.17	9.13	8.96	9.08667	0.0910433		0.001156	**	1.15	0.82	1.3	1.09	0.200499		2.21914	1.76541	2.46229	2.14894	0.288798
52	dio2	31.39	31.87	31.35	20.62	20.49	20.58	10.77	11.38	10.77	10.9733	0.287557		32.23	31.91	32.82	21.75	21.59	21.81	10.48	10.32	11.01	10.6033	0.294882		0.272801		0.29	1.06	-0.24	0.37	0.533729		1.22264	2.08493	0.846745	1.38477	0.518325
53	thra	32.3	32.46	32.32	22.06	22.12	22.01	10.24	10.34	10.31	10.2967	0.0418994		31.99	31.36	31.69	22.02	21.5	21.48	9.97	9.86	10.21	10.0133	0.146135		0.057838		0.27	0.48	0.1	0.283333	0.155421		1.20581	1.39474	1.07177	1.22411	0.132486
54	thrb	31.68	31.81	31.89	22.06	22.12	22.01	9.62	9.69	9.88	9.73	0.109848		30.71	30.6	31	22.02	21.5	21.48	8.69	9.1	9.52	9.10333	0.338854		0.067633		0.93	0.59	0.36	0.626667	0.234141		1.90528	1.50525	1.28343	1.56465	0.257321
55	amh	36.46	36.3	35.91	22.06	22.12	22.01	14.4	14.18	13.9	14.16	0.204613		35.81	36.02	34.69	22.02	21.5	21.48	13.79	14.52	13.21	13.84	0.535973		0.47434		0.61	-0.34	0.69	0.32	0.467832		1.52626	0.790041	1.61328	1.30986	0.369281
56	dmrt1	36.8	36.99	37.35	22.06	22.12	22.01	14.74	14.87	15.34	14.9833	0.257725		37.36	36.66	36.11	22.02	21.5	21.48	15.34	15.16	14.63	15.0433	0.301367		0.841026		-0.6	-0.29	0.71	-0.06	0.558987		0.659754	0.817902	1.6358	1.03782	0.427739
57	sox9a	27.82	27.92	28.06	22.36	21.8	21.83	5.46	6.12	6.23	5.93667	0.340033		28.71	28.35	28.27	22.87	22.69	22.74	5.84	5.66	5.53	5.67667	0.127105		0.368398		-0.38	0.46	0.7	0.26	0.463033		0.768438	1.37554	1.6245	1.25616	0.359538
58	sox9b	27.93	27.44	27.95	22.36	21.8	21.83	5.57	5.64	6.12	5.77667	0.244449		28.88	28.69	28.67	22.87	22.69	22.74	6.01	6	5.93	5.98	0.0355903		0.360304		-0.44	-0.36	0.19	-0.203333	0.28004		0.737135	0.779165	1.14076	0.885688	0.18118
59	tnfα	40.41	39.86	38.23	22.06	22.12	22.01	18.35	17.74	16.22	17.4367	0.895631		38.42	39.79	40.02	22.02	21.5	21.48	16.4	18.29	18.54	17.7433	0.955348		0.757129		1.95	-0.55	-2.32	-0.306667	1.75169		3.86375	0.68302	0.200267	1.58234	1.62519
60	ifn	38.35	37.98	37.54	22.06	22.12	22.01	16.29	15.86	15.53	15.8933	0.311163		38.78	39.02	39.17	22.02	21.5	21.48	16.76	17.52	17.69	17.3233	0.404338		0.016626	*	-0.47	-1.66	-2.16	-1.43	0.708849		0.721965	0.316439	0.223756	0.42072	0.216347
61	il-1β	34.04	34.41	34.1	22.36	21.8	21.83	11.68	12.61	12.27	12.1867	0.384216		36.62	36.42	36.28	22.87	22.69	22.74	13.75	13.73	13.54	13.6733	0.0946338		0.006033	**	-2.07	-1.12	-1.27	-1.48667	0.417		0.238159	0.460094	0.41466	0.370971	0.0957261
62	il-8	31.04	30.9	30.98	22.36	21.8	21.83	8.68	9.1	9.15	8.97667	0.210766		31.16	31.41	31.76	22.87	22.69	22.74	8.29	8.72	9.02	8.67667	0.299592		0.311212		0.39	0.38	0.13	0.3	0.120277		1.31039	1.30134	1.09429	1.23534	0.0998053
63	cxcl-clc	32.98	32.5	32.67	22.36	21.8	21.83	10.62	10.7	10.84	10.72	0.0909212		32.6	32.57	31.86	22.87	22.69	22.74	9.73	9.88	9.12	9.57667	0.328667		0.009027	**	0.89	0.82	1.72	1.14333	0.408765		1.85318	1.76541	3.29436	2.30432	0.700987
64	cc-chemokine	30.41	30.44	30.33	22.36	21.8	21.83	8.05	8.64	8.5	8.39667	0.251705		29.63	29.76	29.25	22.87	22.69	22.74	6.76	7.07	6.51	6.78	0.229056		0.002556	**	1.29	1.57	1.99	1.61667	0.287673		2.44528	2.96905	3.97237	3.1289	0.633596
65	inos	38.59	39.21	39.46	22.06	22.12	22.01	16.53	17.09	17.45	17.0233	0.378535		38.76	36.28	40.02	22.02	21.5	21.48	16.74	14.78	18.54	16.6867	1.53548		0.778366		-0.21	2.31	-1.09	0.336667	1.44086		0.864537	4.95883	0.469761	2.09771	2.02953
66	bcl2	29.42	29.83	29.15	22.36	21.8	21.83	7.06	8.03	7.32	7.47	0.409959		30.46	30.39	30.22	22.87	22.69	22.74	7.59	7.7	7.48	7.59	0.0898146		0.706631		-0.53	0.33	-0.16	-0.12	0.352231		0.692555	1.25701	0.895025	0.948198	0.233486
67	ucp2	24.71	24.68	24.64	22.36	21.8	21.83	2.35	2.88	2.81	2.68	0.235089		24.93	24.45	24.51	22.87	22.69	22.74	2.06	1.76	1.77	1.86333	0.139124		0.013392	*	0.29	1.12	1.04	0.816667	0.373839		1.22264	2.17347	2.05623	1.81745	0.423306
68	hsd3b1	36.66	37.23	37.65	22.06	22.12	22.01	14.6	15.11	15.64	15.1167	0.424604		36.15	35.6	35.65	22.02	21.5	21.48	14.13	14.1	14.17	14.1333	0.0286744		0.030856	*	0.47	1.01	1.47	0.983333	0.408684		1.38511	2.01391	2.77022	2.05641	0.566267
69	hsd11b3a	31.18	30.64	31.04	22.06	22.12	22.01	9.12	8.52	9.03	8.89	0.264197		30.36	30.11	30.14	22.02	21.5	21.48	8.34	8.61	8.66	8.53667	0.140554		0.17029		0.78	-0.09	0.37	0.353333	0.355371		1.71713	0.939523	1.29235	1.31634	0.31791
70	ihcgr	39.81	40.6	38.28	22.06	22.12	22.01	17.75	18.48	16.27	17.5	0.919384		38.53	38.47	40.09	22.02	21.5	21.48	16.51	16.97	18.61	17.3633	0.901308		0.887936		1.24	1.51	-2.34	0.136667	1.75473		2.36199	2.8481	0.19751	1.80253	1.15214
71	fshr	38.78	38.9	38.98	20.62	20.49	20.58	18.16	18.41	18.4	18.3233	0.115566		40.85	38.22	40.99	21.75	21.59	21.81	19.1	16.63	19.18	18.3033	1.18368		0.98315		-0.94	1.78	-0.78	0.02	1.24622		0.521233	3.43426	0.582367	1.51262	1.35903
72	igf3	34.54	36.4	35.17	20.62	20.49	20.58	13.92	15.91	14.59	14.8067	0.826734		34.5	33.82	33.96	21.75	21.59	21.81	12.75	12.23	12.15	12.3767	0.265999		0.01672	*	1.17	3.68	2.44	2.43	1.02473		2.25012	12.8171	5.42642	6.83122	4.42685
73	piwil1	39.51	37.16	40.18	20.62	20.49	20.58	18.89	16.67	19.6	18.3867	1.24799		38.88	38.22	39.03	21.75	21.59	21.81	17.13	16.63	17.22	16.9933	0.259529		0.19704		1.76	0.04	2.38	1.39333	0.98986		3.38698	1.02811	5.20537	3.20682	1.71011
Exposure at 2dpf		10000 ng/L
	Gene	Control												Treatment-10000ng/L												Control vs Treatment-100ng/L
		Target Gene			Reference Gene (β-actin)			ΔCt						Target Gene			Reference Gene (β-actin)			ΔCt						Independent t test								Fold change
No.		Ct-1	Ct-2	Ct-3	Ct-1	Ct-2	Ct-3	ΔCt-1C	ΔCt-2C	ΔCt-3C	ΔCt-C-A	ΔCt-C-SD		Ct-1	Ct-2	Ct-3	Ct-1	Ct-2	Ct-3	ΔCt-1T	ΔCt-2T	ΔCt-3T	ΔCt-T-A	ΔCt-T-SD		p		‒ΔΔCt-1	‒ΔΔCt-2	‒ΔΔCt-3	‒ΔΔCt-A	‒ΔΔCt-SD		2‒ΔΔCt-1	2‒ΔΔCt-2	2‒ΔΔCt-3	2‒ΔΔCt-A	2‒ΔΔCt-SD
1	mprα	31.61	31.77	31.98	21.02	21.41	21.3	10.59	10.36	10.68	10.5433	0.134743		33.77	34.24	33.16	21.94	21.84	21.89	11.83	12.4	11.27	11.8333	0.461327		0.01917	*	-1.24	-2.04	-0.59	-1.29	0.593015		0.423373	0.243164	0.664343	0.443626	0.172541
2	mprβ	31.57	32.1	31.4	21.02	21.41	21.3	10.55	10.69	10.1	10.4467	0.251705		33.78	33.26	33.32	21.94	21.84	21.89	11.84	11.42	11.43	11.5633	0.195675		0.007743	**	-1.29	-0.73	-1.33	-1.11667	0.273902		0.408951	0.602904	0.397768	0.469874	0.0941768
3	esr2a	34.98	36.04	35.75	21.02	21.41	21.3	13.96	14.63	14.45	14.3467	0.283118		36.24	38.12	37.93	21.94	21.84	21.89	14.3	16.28	16.04	15.54	0.88227		0.142654		-0.34	-1.65	-1.59	-1.19333	0.603895		0.790041	0.31864	0.332171	0.480284	0.219101
4	esr2b	34.62	34.25	34.49	21.02	21.41	21.3	13.6	12.84	13.19	13.21	0.310591		35.21	35.64	35.37	21.94	21.84	21.89	13.27	13.8	13.48	13.5167	0.217919		0.316781		0.33	-0.96	-0.29	-0.306667	0.526772		1.25701	0.514057	0.817902	0.862991	0.304982
5	cyp19a1b	34.91	35.34	36.43	21.02	21.41	21.3	13.89	13.93	15.13	14.3167	0.575345		36.09	35.41	36.15	21.94	21.84	21.89	14.15	13.57	14.26	13.9933	0.302692		0.520615		-0.26	0.36	0.87	0.323333	0.462049		0.835088	1.28343	1.82766	1.31539	0.405847
6	clock1a	31.74	32.3	31.71	21.02	21.41	21.3	10.72	10.89	10.41	10.6733	0.198718		35.13	34.88	33.82	21.94	21.84	21.89	13.19	13.04	11.93	12.72	0.561961		0.008304	**	-2.47	-2.15	-1.52	-2.04667	0.394659		0.180491	0.225313	0.348686	0.251497	0.0711176
7	clock1b	29.34	29.38	29.44	21.02	21.41	21.3	8.32	7.97	8.14	8.14333	0.142906		30.58	30.76	30.6	21.94	21.84	21.89	8.64	8.92	8.71	8.75667	0.118977		0.009557	**	-0.32	-0.95	-0.57	-0.613333	0.259015		0.80107	0.517632	0.673617	0.664106	0.115908
8	clock2	32.98	33.5	33.29	21.02	21.41	21.3	11.96	12.09	11.99	12.0133	0.0555778		35.39	35	34.5	21.94	21.84	21.89	13.45	13.16	12.61	13.0733	0.348361		0.013164	*	-1.49	-1.07	-0.62	-1.06	0.355246		0.356013	0.476319	0.650671	0.494334	0.120966
9	arntl1a	28.57	28.54	28.55	21.02	21.41	21.3	7.55	7.13	7.25	7.31	0.176635		29.57	29.48	29.42	21.94	21.84	21.89	7.63	7.64	7.53	7.6	0.0496655		0.089097		-0.08	-0.51	-0.28	-0.29	0.175689		0.946058	0.702222	0.823591	0.823957	0.0995456
10	arntl1b	31.03	30.71	31.18	20.31	20.25	20.3	10.72	10.46	10.88	10.6867	0.173077		32.69	32.24	32.74	22.13	22.38	22.03	10.56	9.86	10.71	10.3767	0.370435		0.344		0.16	0.6	0.17	0.31	0.205102		1.11729	1.51572	1.12506	1.25269	0.186017
11	arntl2	28.69	29.46	29.01	21.02	21.41	21.3	7.67	8.05	7.71	7.81	0.170489		31.3	30.88	31.25	21.94	21.84	21.89	9.36	9.04	9.36	9.25333	0.150849		0.000856	***	-1.69	-0.99	-1.65	-1.44333	0.320971		0.309927	0.503478	0.31864	0.377348	0.0892579
12	nr1d1	33.34	33.58	33.05	21.02	21.41	21.3	12.32	12.17	11.75	12.08	0.241247		35.96	36.16	35.63	21.94	21.84	21.89	14.02	14.32	13.74	14.0267	0.236831		0.001237	**	-1.7	-2.15	-1.99	-1.94667	0.18625		0.307786	0.225313	0.251739	0.261613	0.0343859
13	nr1d2a	31.28	30.99	30.85	21.02	21.41	21.3	10.26	9.58	9.55	9.79667	0.327855		33.72	34.13	34.11	21.94	21.84	21.89	11.78	12.29	12.22	12.0967	0.225733		0.001221	**	-1.52	-2.71	-2.67	-2.3	0.551785		0.348686	0.15283	0.157127	0.219548	0.0913315
14	nr1d2b	30.66	30.4	30.53	21.02	21.41	21.3	9.64	8.99	9.23	9.28667	0.26837		32.53	32.67	32.86	21.94	21.84	21.89	10.59	10.83	10.97	10.7967	0.156915		0.002353	**	-0.95	-1.84	-1.74	-1.51	0.398079		0.517632	0.279322	0.29937	0.365441	0.107926
15	per1a	36.73	37.38	37.03	20.31	20.25	20.3	16.42	17.13	16.73	16.76	0.290631		38.14	38.56	37.98	21.94	21.84	21.89	16.2	16.72	16.09	16.3367	0.274752		0.208759		0.22	0.41	0.64	0.423333	0.171723		1.16473	1.32869	1.55833	1.35058	0.161429
16	per1b	30.04	30.38	29.85	22.52	22.48	22.51	7.52	7.9	7.34	7.58667	0.233429		30.65	30.51	30.59	23.85	23.26	23.32	6.8	7.25	7.27	7.10667	0.217		0.10022		0.72	0.65	0.07	0.48	0.291319		1.64718	1.56917	1.04972	1.42202	0.265179
17	per2	32.85	32.91	33.02	22.52	22.48	22.51	10.33	10.43	10.51	10.4233	0.0736357		34.03	33.72	33.64	23.85	23.26	23.32	10.18	10.46	10.32	10.32	0.11431		0.343003		0.15	-0.03	0.19	0.103333	0.0956847		1.10957	0.97942	1.14076	1.07658	0.0698758
18	per3	31.33	31.24	31.31	22.52	22.48	22.51	8.81	8.76	8.8	8.79	0.0216025		32.98	33.11	32.28	23.85	23.26	23.32	9.13	9.85	8.96	9.31333	0.385775		0.194714		-0.32	-1.09	-0.16	-0.523333	0.405983		0.80107	0.469761	0.895025	0.721952	0.182404
19	cry1a	33	32.94	32.2	22.52	22.48	22.51	10.48	10.46	9.69	10.21	0.367786		34.25	34.46	34.28	23.85	23.26	23.32	10.4	11.2	10.96	10.8533	0.335195		0.1415		0.08	-0.74	-1.27	-0.643333	0.555358		1.05702	0.598739	0.41466	0.690139	0.270088
20	cry1b	33.82	33.89	34.58	22.52	22.48	22.51	11.3	11.41	12.07	11.5933	0.340033		35.32	35.72	35.16	23.85	23.26	23.32	11.47	12.46	11.84	11.9233	0.408439		0.429452		-0.17	-1.05	0.23	-0.33	0.534665		0.888843	0.482968	1.17283	0.848215	0.283098
21	cry2a	28.87	29	28.85	22.52	22.48	22.51	6.35	6.52	6.34	6.40333	0.0825967		29.63	29.63	29.3	23.85	23.26	23.32	5.78	6.37	5.98	6.04333	0.244994		0.120283		0.57	0.15	0.36	0.36	0.171464		1.48452	1.10957	1.28343	1.29251	0.153209
22	cry2b	33.26	32.13	32.34	22.52	22.48	22.51	10.74	9.65	9.83	10.0733	0.477098		33.28	33.16	33.44	23.85	23.26	23.32	9.43	9.9	10.12	9.81667	0.287789		0.550279		1.31	-0.25	-0.29	0.256667	0.744998		2.47942	0.840896	0.817902	1.3794	0.777882
23	cry3	31.25	31.13	31.62	22.52	22.48	22.51	8.73	8.65	9.11	8.83	0.200666		31.62	31.01	31.21	23.85	23.26	23.32	7.77	7.75	7.89	7.80333	0.0618241		0.002295	**	0.96	0.9	1.22	1.02667	0.138884		1.94531	1.86607	2.32947	2.04695	0.202374
24	cry4	30.26	30.45	30.12	22.52	22.48	22.51	7.74	7.97	7.61	7.77333	0.148847		30.69	30.33	30.38	23.85	23.26	23.32	6.84	7.07	7.06	6.99	0.106145		0.003744	**	0.9	0.9	0.55	0.783333	0.164992		1.86607	1.86607	1.46409	1.73207	0.189495
25	cry5	31.77	32.35	31.51	22.52	22.48	22.51	9.25	9.87	9	9.37333	0.365726		32.26	32.14	32.47	23.85	23.26	23.32	8.41	8.88	9.15	8.81333	0.30576		0.171983		0.84	0.99	-0.15	0.56	0.505767		1.79005	1.98618	0.90125	1.55916	0.472054
26	pgr	34.71	34.44	34.78	22.52	22.48	22.51	12.19	11.96	12.27	12.14	0.131403		35.56	35.69	35.8	23.85	23.26	23.32	11.71	12.43	12.48	12.2067	0.351789		0.814136		0.48	-0.47	-0.21	-0.0666667	0.40086		1.39474	0.721965	0.864537	0.993748	0.289459
27	esr1	38.69	36.19	37.94	22.52	22.48	22.51	16.17	13.71	15.43	15.1033	1.03051		39.44	37.57	37.76	23.85	23.26	23.32	15.59	14.31	14.44	14.78	0.57521		0.718155		0.58	-0.6	0.99	0.323333	0.67401		1.49485	0.659754	1.98618	1.38026	0.547541
28	vtg1	35.3	34.8	34.53	20.31	20.25	20.3	14.99	14.55	14.23	14.59	0.311555		35.39	36.08	36.17	22.13	22.38	22.03	13.26	13.7	14.14	13.7	0.359258		0.057172		1.73	0.85	0.09	0.89	0.670124		3.31728	1.8025	1.06437	2.06138	0.937786
29	ar	33.1	33.35	33.61	22.52	22.48	22.51	10.58	10.87	11.1	10.85	0.21276		33.92	33.9	33.94	23.85	23.26	23.32	10.07	10.64	10.62	10.4433	0.264113		0.165175		0.51	0.23	0.48	0.406667	0.125521		1.42405	1.17283	1.39474	1.33054	0.112156
30	mr	32.68	33.12	32.88	22.52	22.48	22.51	10.16	10.64	10.37	10.39	0.196469		33.85	34.41	34.53	23.85	23.26	23.32	10	11.15	11.21	10.7867	0.556796		0.395868		0.16	-0.51	-0.84	-0.396667	0.41604		1.11729	0.702222	0.558644	0.792718	0.236872
31	gr	29.15	29.01	28.95	21.6	21.06	21.01	7.55	7.95	7.94	7.81333	0.18625		30.11	30.15	30.04	22.16	21.93	22.24	7.95	8.22	7.8	7.99	0.173781		0.382219		-0.4	-0.27	0.14	-0.176667	0.230121		0.757858	0.82932	1.10191	0.896361	0.148241
32	star	30.35	30.47	30.08	21.6	21.06	21.01	8.75	9.41	9.07	9.07667	0.269485		31.08	31.15	31.13	22.16	21.93	22.24	8.92	9.22	8.89	9.01	0.148997		0.774746		-0.17	0.19	0.18	0.0666667	0.167398		0.888843	1.14076	1.13288	1.05416	0.116944
33	cyp11a1	35.73	36.13	36.29	21.6	21.06	21.01	14.13	15.07	15.28	14.8267	0.500022		38.5	38.8	38.34	22.16	21.93	22.24	16.34	16.87	16.1	16.4367	0.321697		0.018626	*	-2.21	-1.8	-0.82	-1.61	0.583152		0.216134	0.287175	0.566442	0.356584	0.1512
34	cyp17a1	29.72	29.68	29.53	21.6	21.06	21.01	8.12	8.62	8.52	8.42	0.216025		31.8	31.62	31.85	22.16	21.93	22.24	9.64	9.69	9.61	9.64667	0.0329983		0.013566	*	-1.52	-1.07	-1.09	-1.22667	0.207579		0.348686	0.476319	0.469761	0.431589	0.0586823
35	cyp19a1a	38.95	38.5	39.79	20.31	20.25	20.3	18.64	18.25	19.49	18.7933	0.517709		39.78	37.64	38.83	22.13	22.38	22.03	17.65	15.26	16.8	16.57	0.989175		0.048009	*	0.99	2.99	2.69	2.22333	0.880656		1.98618	7.94474	6.45313	5.46135	2.53164
36	cyp11b	33.43	33.54	34.02	20.31	20.25	20.3	13.12	13.29	13.72	13.3767	0.252499		35.82	36.16	35.69	22.13	22.38	22.03	13.69	13.78	13.66	13.71	0.0509902		0.141225		-0.57	-0.49	0.06	-0.333333	0.28004		0.673617	0.712025	1.04247	0.809369	0.165568
37	hsd3b	31.66	31.38	31.59	21.6	21.06	21.01	10.06	10.32	10.58	10.32	0.212289		32.35	29.95	32.31	22.16	21.93	22.24	10.19	8.02	10.07	9.42667	0.995869		0.331502		-0.13	2.3	0.51	0.893333	1.02841		0.913831	4.92458	1.42405	2.42082	1.78264
38	hsd20b	27.51	27.11	27.49	20.31	20.25	20.3	7.2	6.86	7.19	7.08333	0.157973		28.52	28.47	28.71	22.13	22.38	22.03	6.39	6.09	6.68	6.38667	0.240878		0.026774	*	0.81	0.77	0.51	0.696667	0.133		1.75321	1.70527	1.42405	1.62751	0.145193
39	hsd17b3	32.93	33.35	33.05	21.6	21.06	21.01	11.33	12.29	12.04	11.8867	0.406639		34.12	33.71	33.95	22.16	21.93	22.24	11.96	11.78	11.71	11.8167	0.105304		0.825261		-0.63	0.51	0.33	0.07	0.5004		0.646176	1.42405	1.25701	1.10908	0.33435
40	hsd11b2	29.66	29.43	29.39	21.6	21.06	21.01	8.06	8.37	8.38	8.27	0.148549		30.2	30.08	30.42	22.16	21.93	22.24	8.04	8.15	8.18	8.12333	0.0601849		0.265286		0.02	0.22	0.2	0.146667	0.0899383		1.01396	1.16473	1.1487	1.10913	0.0676137
41	gnrh2	31.34	31.35	31.68	21.6	21.06	21.01	9.74	10.29	10.67	10.2333	0.381779		32.2	32.49	32.46	22.16	21.93	22.24	10.04	10.56	10.22	10.2733	0.215613		0.903571		-0.3	-0.27	0.45	-0.04	0.346699		0.812252	0.82932	1.36604	1.00254	0.25713
42	gnrh3	30.8	30.43	30.23	21.6	21.06	21.01	9.2	9.37	9.22	9.26333	0.0758654		30.74	30.97	30.56	22.16	21.93	22.24	8.58	9.04	8.32	8.64667	0.297695		0.046926	*	0.62	0.33	0.9	0.616667	0.232713		1.53688	1.25701	1.86607	1.55332	0.248916
43	fshb	40.09	38.69	37.96	21.6	21.06	21.01	18.49	17.63	16.95	17.69	0.630132		39.52	40.37	38.78	22.16	21.93	22.24	17.36	18.44	16.54	17.4467	0.778089		0.74838		1.13	-0.81	0.41	0.243333	0.800722		2.18859	0.570382	1.32869	1.36255	0.661064
44	lhb	38.92	39.41	40.2	21.6	21.06	21.01	17.32	18.35	19.19	18.2867	0.764737		39.65	40.27	40.68	22.16	21.93	22.24	17.49	18.34	18.44	18.09	0.426224		0.766619		-0.17	0.01	0.75	0.196667	0.398107		0.888843	1.00696	1.68179	1.19253	0.349305
45	crh	33.51	33.43	33.53	21.6	21.06	21.01	11.91	12.37	12.52	12.2667	0.259529		32.55	33.41	33.21	22.16	21.93	22.24	10.39	11.48	10.97	10.9467	0.445296		0.022319	*	1.52	0.89	1.55	1.32	0.304302		2.86791	1.85318	2.92817	2.54975	0.493168
46	pomc	35.09	35.57	35.24	22.68	22.5	22.52	12.41	13.07	12.72	12.7333	0.269609		32.78	32.52	32.78	20.62	20.55	20.7	12.16	11.97	12.08	12.07	0.0778888		0.028762	*	0.25	1.1	0.64	0.663333	0.347403		1.18921	2.14355	1.55833	1.63036	0.392923
47	trh	36.93	36.88	36.87	22.68	22.5	22.52	14.25	14.38	14.35	14.3267	0.0555778		35.54	34.72	35.59	20.62	20.55	20.7	14.92	14.17	14.89	14.66	0.346699		0.305976		-0.67	0.21	-0.54	-0.333333	0.387843		0.628507	1.15669	0.687771	0.824322	0.236261
48	tshb	34.16	34.24	34.45	22.68	22.5	22.52	11.48	11.74	11.93	11.7167	0.184451		32.32	32.7	32.15	20.62	20.55	20.7	11.7	12.15	11.45	11.7667	0.289636		0.846906		-0.22	-0.41	0.48	-0.05	0.38271		0.858565	0.752623	1.39474	1.00198	0.281075
49	nis	37.75	36.91	36.31	22.68	22.5	22.52	15.07	14.41	13.79	14.4233	0.522643		35.24	36.67	34.96	20.62	20.55	20.7	14.62	16.12	14.26	15	0.805481		0.443533		0.45	-1.71	-0.47	-0.576667	0.885036		1.36604	0.30566	0.721965	0.797888	0.436215
50	tg	35.51	36.07	36.84	22.68	22.5	22.52	12.83	13.57	14.32	13.5733	0.608295		34.64	33.98	34.48	20.62	20.55	20.7	14.02	13.43	13.78	13.7433	0.242258		0.732084		-1.19	0.14	0.54	-0.17	0.739504		0.438303	1.10191	1.45397	0.99806	0.421097
51	dio1	34.15	33.15	32.33	22.68	22.5	22.52	11.47	10.65	9.81	10.6433	0.677709		30.73	31.37	30.77	20.62	20.55	20.7	10.11	10.82	10.07	10.3333	0.344513		0.595065		1.36	-0.17	-0.26	0.31	0.743371		2.56685	0.888843	0.835088	1.43026	0.803991
52	dio2	33.8	34.69	35.23	22.68	22.5	22.52	11.12	12.19	12.71	12.0067	0.661933		32.89	33.11	32.72	20.62	20.55	20.7	12.27	12.56	12.02	12.2833	0.220656		0.604885		-1.15	-0.37	0.69	-0.276667	0.75407		0.450625	0.773782	1.61328	0.945897	0.490008
53	thra	33.27	32.59	33.02	22.68	22.5	22.52	10.59	10.09	10.5	10.3933	0.217613		31.97	32.03	31.88	20.62	20.55	20.7	11.35	11.48	11.18	11.3367	0.122837		0.005931	**	-0.76	-1.39	-0.68	-0.943333	0.317525		0.590496	0.381565	0.624165	0.532075	0.107311
54	thrb	32.11	32.13	32.23	22.68	22.5	22.52	9.43	9.63	9.71	9.59	0.117757		30.13	30.08	30.25	20.62	20.55	20.7	9.51	9.53	9.55	9.53	0.0163299		0.514819		-0.08	0.1	0.16	0.06	0.10198		0.946058	1.07177	1.11729	1.04504	0.0724151
55	amh	37.16	38.05	38.07	22.68	23.17	22.65	14.48	14.88	15.42	14.9267	0.38517		37.48	37.42	35.64	22.25	22.6	22.23	15.23	14.82	13.41	14.4867	0.779501		0.51375		-0.75	0.06	2.01	0.44	1.15836		0.594604	1.04247	4.02782	1.8883	1.52388
56	dmrt1	37.51	36.64	38.18	22.68	23.17	22.65	14.83	13.47	15.53	14.61	0.855258		37.32	35.86	38.04	22.25	22.6	22.23	15.07	13.26	15.81	14.7133	1.07115		0.920229		-0.24	0.21	-0.28	-0.103333	0.222161		0.846745	1.15669	0.823591	0.942342	0.15186
57	sox9a	29.1	28.89	29.1	22.68	23.17	22.65	6.42	5.72	6.45	6.19667	0.337277		27.92	28.41	28	22.25	22.6	22.23	5.67	5.81	5.77	5.75	0.0588784		0.199017		0.75	-0.09	0.68	0.446667	0.380555		1.68179	0.939523	1.60214	1.40782	0.332728
58	sox9b	28.28	28.33	28.28	22.68	23.17	22.65	5.6	5.16	5.63	5.46333	0.214838		27.77	27.31	27.24	22.25	22.6	22.23	5.52	4.71	5.01	5.08	0.334365		0.244268		0.08	0.45	0.62	0.383333	0.225438		1.05702	1.36604	1.53688	1.31998	0.19859
59	tnfα	38.72	38.13	39.4	20.31	20.25	20.3	18.41	17.88	19.1	18.4633	0.499489		40.42	40.56	40.87	22.13	22.38	22.03	18.29	18.18	18.84	18.4367	0.288714		0.951018		0.12	-0.3	0.26	0.0266667	0.237954		1.08673	0.812252	1.19748	1.03216	0.161934
60	ifn	36.82	35.62	34.88	20.31	20.25	20.3	16.51	15.37	14.58	15.4867	0.792226		37.03	37.97	36.43	22.13	22.38	22.03	14.9	15.59	14.4	14.9633	0.487875		0.470876		1.61	-0.22	0.18	0.523333	0.78555		3.05252	0.858565	1.13288	1.68132	0.976028
61	il-1β	34.29	34.55	35.13	22.68	23.17	22.65	11.61	11.38	12.48	11.8233	0.473732		34.95	35.23	35.59	22.25	22.6	22.23	12.7	12.63	13.36	12.8967	0.32887		0.058058		-1.09	-1.25	-0.88	-1.07333	0.151511		0.469761	0.420448	0.543367	0.477859	0.0505072
62	il-8	32.29	31.72	32.33	22.68	23.17	22.65	9.61	8.55	9.68	9.28	0.516978		32.62	32.59	32.53	22.25	22.6	22.23	10.37	9.99	10.3	10.22	0.165126		0.070484		-0.76	-1.44	-0.62	-0.94	0.358143		0.590496	0.368567	0.650671	0.536578	0.121315
63	cxcl-clc	33.06	33.68	32.95	22.68	23.17	22.65	10.38	10.51	10.3	10.3967	0.0865384		34.12	34	34.63	22.25	22.6	22.23	11.87	11.4	12.4	11.89	0.408493		0.007192	**	-1.49	-0.89	-2.1	-1.49333	0.493986		0.356013	0.539614	0.233258	0.376295	0.125889
64	cc-chemokine	31.3	31.05	31.18	22.68	23.17	22.65	8.62	7.88	8.53	8.34333	0.32968		32.31	31.66	31.9	22.25	22.6	22.23	10.06	9.06	9.67	9.59667	0.411528		0.028267	*	-1.44	-1.18	-1.14	-1.25333	0.133		0.368567	0.441351	0.45376	0.421226	0.0375784
65	inos	35.27	35.08	37.35	20.31	20.25	20.3	14.96	14.83	17.05	15.6133	1.01726		37.61	37.33	37.46	22.13	22.38	22.03	15.48	14.95	15.43	15.2867	0.238933		0.697797		-0.52	-0.12	1.62	0.326667	0.92899		0.697372	0.920188	3.07375	1.56377	1.07159
66	bcl2	29.8	30.01	30.12	22.68	23.17	22.65	7.12	6.84	7.47	7.14333	0.257725		29.25	29.31	29.43	22.25	22.6	22.23	7	6.71	7.2	6.97	0.201163		0.495081		0.12	0.13	0.27	0.173333	0.0684755		1.08673	1.09429	1.20581	1.12895	0.0544374
67	ucp2	25.87	25.82	26.48	22.68	23.17	22.65	3.19	2.65	3.83	3.22333	0.482309		25.66	25.7	25.63	22.25	22.6	22.23	3.41	3.1	3.4	3.30333	0.143836		0.833159		-0.22	-0.45	0.43	-0.08	0.372648		0.858565	0.732043	1.34723	0.979281	0.26526
68	hsd3b1	38.58	37.67	38.46	22.68	23.17	22.65	15.9	14.5	15.81	15.4033	0.639809		36.83	36.62	37.17	22.25	22.6	22.23	14.58	14.02	14.94	14.5133	0.378535		0.16569		1.32	0.48	0.87	0.89	0.34322		2.49666	1.39474	1.82766	1.90636	0.453284
69	hsd11b3a	31.38	31.19	31.07	22.68	22.5	22.52	8.7	8.69	8.55	8.64667	0.0684755		29.81	29.7	29.47	20.62	20.55	20.7	9.19	9.15	8.77	9.03667	0.189268		0.051891		-0.49	-0.46	-0.22	-0.39	0.12083		0.712025	0.726986	0.858565	0.765859	0.0658373
70	ihcgr	38.62	40.26	39.43	22.68	22.5	22.52	15.94	17.76	16.91	16.87	0.74355		38.45	39.65	37.46	20.62	20.55	20.7	17.83	19.1	16.76	17.8967	0.956463		0.296884		-1.89	-1.34	0.15	-1.02667	0.861794		0.269807	0.395021	1.10957	0.591466	0.369904
71	fshr	38.52	38.26	38.41	20.68	20.5	20.52	17.84	17.76	17.89	17.83	0.0535413		39.14	39.52	39.78	21.62	21.55	21.7	17.52	17.97	18.08	17.8567	0.242258		0.886544		0.32	-0.21	-0.19	-0.0266667	0.245266		1.24833	0.864537	0.876606	0.996491	0.178145
72	igf3	33.24	32.97	33.09	20.31	20.25	20.3	12.93	12.72	12.79	12.8133	0.0873053		34.62	33.17	34.37	22.13	22.38	22.03	12.49	10.79	12.34	11.8733	0.768476		0.224639		0.44	1.93	0.45	0.94	0.700048		1.3566	3.81055	1.36604	2.17773	1.15458
73	piwil1	38.21	39.65	40.25	22.68	22.5	22.52	15.53	17.15	17.73	16.8033	0.930997		40.48	38.47	38.21	20.62	20.55	20.7	19.86	17.92	17.51	18.43	1.02492		0.171967		-4.33	-0.77	0.22	-1.62667	1.95381		0.049721	0.586417	1.16473	0.600291	0.455308
Exposure at 7dpf		100 ng/L
	Gene	Control												Treatment-100ng/L												Control vs Treatment-100ng/L
		Target Gene			Reference Gene (β-actin)			ΔCt						Target Gene			Reference Gene (β-actin)			ΔCt						Independent t test								Fold change
No.		Ct-1	Ct-2	Ct-3	Ct-1	Ct-2	Ct-3	ΔCt-1C	ΔCt-2C	ΔCt-3C	ΔCt-C-A	ΔCt-C-SD		Ct-1	Ct-2	Ct-3	Ct-1	Ct-2	Ct-3	ΔCt-1T	ΔCt-2T	ΔCt-3T	ΔCt-T-A	ΔCt-T-SD		p		‒ΔΔCt-1	‒ΔΔCt-2	‒ΔΔCt-3	‒ΔΔCt-A	‒ΔΔCt-SD		2‒ΔΔCt-1	2‒ΔΔCt-2	2‒ΔΔCt-3	2‒ΔΔCt-A	2‒ΔΔCt-SD
1	mprα	33.98	33.32	33.77	23.34	23.29	23.34	10.64	10.03	10.43	10.3667	0.253026		33.01	33.52	32.88	23.61	23.54	23.74	9.4	9.98	9.14	9.50667	0.351125		0.048309	*	1.24	0.05	1.29	0.86	0.57312		2.36199	1.03526	2.44528	1.94751	0.645951
2	mprβ	33.21	32.72	33.15	23.34	23.29	23.34	9.87	9.43	9.81	9.70333	0.194822		32.69	33.93	33.2	23.61	23.54	23.74	9.08	10.39	9.46	9.64333	0.550293		0.891461		0.79	-0.96	0.35	0.06	0.743281		1.72907	0.514057	1.27456	1.17256	0.501245
3	esr2a	35.97	34.45	34.78	20.53	20.24	20.07	15.44	14.21	14.71	14.7867	0.505063		37.11	36.62	37.02	23.28	23.34	23.4	13.83	13.28	13.62	13.5767	0.226618		0.036532	*	1.61	0.93	1.09	1.21	0.290287		3.05252	1.90528	2.12874	2.36218	0.496596
4	esr2b	38.97	38.24	37.98	23.34	23.29	23.34	15.63	14.95	14.64	15.0733	0.413468		38.43	38.72	38.31	23.61	23.54	23.74	14.82	15.18	14.57	14.8567	0.250377		0.560577		0.81	-0.23	0.07	0.216667	0.437061		1.75321	0.852635	1.04972	1.21852	0.386549
5	cyp19a1b	35.62	34.48	36.67	23.34	23.29	23.34	12.28	11.19	13.33	12.2667	0.873702		35.23	35.12	35.35	23.61	23.54	23.74	11.62	11.58	11.61	11.6033	0.0169967		0.343494		0.66	-0.39	1.72	0.663333	0.861407		1.58008	0.76313	3.29436	1.87919	1.05479
6	clock1a	33.86	34.04	34.26	23.34	23.29	23.34	10.52	10.75	10.92	10.73	0.163911		33.82	33.46	34.3	23.61	23.54	23.74	10.21	9.92	10.56	10.23	0.261661		0.083844		0.31	0.83	0.36	0.5	0.234236		1.23971	1.77769	1.28343	1.43361	0.243954
7	clock1b	28.37	28.46	28.48	23.34	23.29	23.34	5.03	5.17	5.14	5.11333	0.0601849		28.59	28.71	28.91	23.61	23.54	23.74	4.98	5.17	5.17	5.10667	0.0895669		0.934576		0.05	0	-0.03	0.00666667	0.0329983		1.03526	1	0.97942	1.0049	0.0230597
8	clock2	32.26	32.6	32.75	23.34	23.29	23.34	8.92	9.31	9.41	9.21333	0.211397		32.24	32.3	32.31	23.61	23.54	23.74	8.63	8.76	8.57	8.65333	0.0793025		0.024725	*	0.29	0.55	0.84	0.56	0.224648		1.22264	1.46409	1.79005	1.49226	0.232499
9	arntl1a	30	30.13	29.97	23.34	23.29	23.34	6.66	6.84	6.63	6.71	0.0927362		30.35	30.2	30.22	23.61	23.54	23.74	6.74	6.66	6.48	6.62667	0.10873		0.455894		-0.08	0.18	0.15	0.0833333	0.116142		0.946058	1.13288	1.10957	1.06284	0.0831222
10	arntl1b	34.19	34.39	34.39	23.34	23.29	23.34	10.85	11.1	11.05	11	0.108012		33.8	33.46	33.63	23.61	23.54	23.74	10.19	9.92	9.89	10	0.134907		0.001215	**	0.66	1.18	1.16	1	0.240555		1.58008	2.26577	2.23457	2.02681	0.316139
11	arntl2	34.31	34.43	34.11	23.34	23.29	23.34	10.97	11.14	10.77	10.96	0.151217		34.16	33.73	34.47	23.61	23.54	23.74	10.55	10.19	10.73	10.49	0.224499		0.070021		0.42	0.95	0.04	0.47	0.373184		1.33793	1.93187	1.02811	1.43264	0.374987
12	nr1d1	28.25	28.26	28.29	23.34	23.29	23.34	4.91	4.97	4.95	4.94333	0.0249444		27.27	27.38	27.39	23.61	23.54	23.74	3.66	3.84	3.65	3.71667	0.0873053		4.4e-05	***	1.25	1.13	1.3	1.22667	0.0713364		2.37841	2.18859	2.46229	2.3431	0.114495
13	nr1d2a	30.4	30.83	30.83	23.34	23.29	23.34	7.06	7.54	7.49	7.36333	0.215458		29.4	29.54	29.96	23.61	23.54	23.74	5.79	6	6.22	6.00333	0.175563		0.002288	**	1.27	1.54	1.27	1.36	0.127279		2.41162	2.90795	2.41162	2.57706	0.233972
14	nr1d2b	30.8	31.01	31.66	23.34	23.29	23.34	7.46	7.72	8.32	7.83333	0.360123		31.17	30.22	30.39	23.61	23.54	23.74	7.56	6.68	6.65	6.96333	0.422085		0.090862		-0.1	1.04	1.67	0.87	0.73253		0.933033	2.05623	3.18215	2.05714	0.918197
15	per1a	32.98	34.13	33.4	23.34	23.29	23.34	9.64	10.84	10.06	10.18	0.497192		32.38	32.3	32.49	23.61	23.54	23.74	8.77	8.76	8.75	8.76	0.00816497		0.015623	*	0.87	2.08	1.31	1.42	0.500067		1.82766	4.22807	2.47942	2.84505	1.01349
16	per1b	26.42	26.27	26.33	22.58	22.6	22.62	3.84	3.67	3.71	3.74	0.0725718		28.15	28.16	28.26	25.34	25.34	25.39	2.81	2.82	2.87	2.83333	0.0262467		7.7e-05	***	1.03	0.85	0.84	0.906667	0.0873053		2.04202	1.8025	1.79005	1.87819	0.115959
17	per2	30.01	30.36	30.06	20.53	20.24	20.07	9.48	10.12	9.99	9.86333	0.276204		33.43	33.7	33.75	23.28	23.34	23.4	10.15	10.36	10.35	10.2867	0.0967241		0.110224		-0.67	-0.24	-0.36	-0.423333	0.181169		0.628507	0.846745	0.779165	0.751472	0.091222
18	per3	27.12	27.22	27.26	22.58	22.6	22.62	4.54	4.62	4.64	4.6	0.0432049		30.69	30.7	31.3	25.34	25.34	25.39	5.35	5.36	5.91	5.54	0.261661		0.033675	*	-0.81	-0.74	-1.27	-0.94	0.235089		0.570382	0.598739	0.41466	0.527927	0.0809244
19	cry1a	27.69	27.72	27.81	22.58	22.6	22.62	5.11	5.12	5.19	5.14	0.0355903		32.3	33.02	32.55	25.34	25.34	25.39	6.96	7.68	7.16	7.26667	0.303462		0.000597	***	-1.85	-2.56	-1.97	-2.12667	0.310305		0.277392	0.169576	0.255253	0.234074	0.046494
20	cry1b	29.21	29.25	29.29	22.58	22.6	22.62	6.63	6.65	6.67	6.65	0.0163299		35.07	34.47	34.57	25.34	25.34	25.39	9.73	9.13	9.18	9.34667	0.271825		0.004917	**	-3.1	-2.48	-2.51	-2.69667	0.285463		0.116629	0.179244	0.175556	0.157143	0.0286872
21	cry2a	27.15	27.09	27.1	22.58	22.6	22.62	4.57	4.49	4.48	4.51333	0.0402768		30.46	30.48	30.44	25.34	25.34	25.39	5.12	5.14	5.05	5.10333	0.0385861		0.000116	***	-0.55	-0.65	-0.57	-0.59	0.0432049		0.68302	0.63728	0.673617	0.664639	0.0197228
22	cry2b	31.36	31.87	31.18	20.53	20.24	20.07	10.83	11.63	11.11	11.19	0.331461		34.35	33.38	33.01	23.28	23.34	23.4	11.07	10.04	9.61	10.24	0.61259		0.125976		-0.24	1.59	1.5	0.95	0.842259		0.846745	3.01049	2.82843	2.22856	0.97991
23	cry3	27.72	27.79	27.87	22.58	22.6	22.62	5.14	5.19	5.25	5.19333	0.0449691		29.75	29.59	29.66	25.34	25.34	25.39	4.41	4.25	4.27	4.31	0.0711805		0.00012	***	0.73	0.94	0.98	0.883333	0.109646		1.65864	1.91853	1.97247	1.84988	0.137007
24	cry4	30.1	30.11	30.04	22.58	22.6	22.62	7.52	7.51	7.42	7.48333	0.0449691		33.46	33.54	33.38	25.34	25.34	25.39	8.12	8.2	7.99	8.10333	0.0865384		0.000847	***	-0.6	-0.69	-0.57	-0.62	0.0509902		0.659754	0.619854	0.673617	0.651075	0.0227905
25	cry5	27.97	27.78	28.45	22.58	22.6	22.62	5.39	5.18	5.83	5.46667	0.270842		29.57	29.52	29.52	25.34	25.34	25.39	4.23	4.18	4.13	4.18	0.0408248		0.002665	**	1.16	1	1.7	1.28667	0.299481		2.23457	2	3.24901	2.49453	0.542026
26	pgr	36.42	35.57	35.66	22.58	22.6	22.62	13.84	12.97	13.04	13.2833	0.394659		36.32	37.95	36.72	25.34	25.34	25.39	10.98	12.61	11.33	11.64	0.700619		0.044558	*	2.86	0.36	1.71	1.64333	1.02171		7.26015	1.28343	3.27161	3.9384	2.48513
27	esr1	35.15	34.2	35	23.06	23.01	23.02	12.09	11.19	11.98	11.7533	0.40086		34.6	34.39	34.85	22.64	22.78	23.17	11.96	11.61	11.68	11.75	0.151217		0.991748		0.13	-0.42	0.3	0.00333333	0.307282		1.09429	0.747425	1.23114	1.02429	0.203588
28	vtg1	35.96	34.53	34.42	23.06	23.01	23.02	12.9	11.52	11.4	11.94	0.680588		35.82	35.73	35.69	22.64	22.78	23.17	13.18	12.95	12.52	12.8833	0.273537		0.14308		-0.28	-1.43	-1.12	-0.943333	0.485821		0.823591	0.371131	0.460094	0.551605	0.195722
29	ar	29.93	29.71	29.59	22.58	22.6	22.62	7.35	7.11	6.97	7.14333	0.156915		32.93	33.17	32.66	25.34	25.34	25.39	7.59	7.83	7.27	7.56333	0.229395		0.099408		-0.24	-0.72	-0.3	-0.42	0.213542		0.846745	0.607097	0.812252	0.755365	0.105782
30	mr	29.2	29.27	29.16	22.58	22.6	22.62	6.62	6.67	6.54	6.61	0.0535413		33.24	33.45	33.55	25.34	25.34	25.39	7.9	8.11	8.16	8.05667	0.112645		8.1e-05	***	-1.28	-1.44	-1.62	-1.44667	0.138884		0.411796	0.368567	0.325335	0.368566	0.0352972
31	gr	28.99	29.01	29	20.53	20.24	20.07	8.46	8.77	8.93	8.72	0.195107		32.96	32.32	32.16	23.28	23.34	23.4	9.68	8.98	8.76	9.14	0.392258		0.246661		-1.22	-0.21	0.17	-0.42	0.586572		0.429283	0.864537	1.12506	0.806293	0.287019
32	star	31.4	31.3	31.27	22.36	22.32	22.32	9.04	8.98	8.95	8.99	0.0374166		30.96	30.53	30.37	22.05	21.98	22.06	8.91	8.55	8.31	8.59	0.246577		0.085899		0.13	0.43	0.64	0.4	0.209284		1.09429	1.34723	1.55833	1.33329	0.189698
33	cyp11a1	35	35.05	33.37	22.36	22.32	22.32	12.64	12.73	11.05	12.14	0.771622		34.84	35.01	34.07	22.05	21.98	22.06	12.79	13.03	12.01	12.61	0.435431		0.494851		-0.15	-0.3	-0.96	-0.47	0.351852		0.90125	0.812252	0.514057	0.74252	0.165583
34	cyp17a1	31.89	31.58	31.55	22.36	22.32	22.32	9.53	9.26	9.23	9.34	0.134907		33.69	33.6	33.12	22.05	21.98	22.06	11.64	11.62	11.06	11.44	0.268825		0.00059	***	-2.11	-2.36	-1.83	-2.1	0.216487		0.231647	0.194791	0.281265	0.235901	0.0354306
35	cyp19a1a	35.26	34.33	33.18	22.36	22.32	22.32	12.9	12.01	10.86	11.9233	0.835078		33.65	32.91	31.34	22.05	21.98	22.06	11.6	10.93	9.28	10.6033	0.974896		0.219556		1.3	1.08	1.58	1.32	0.204613		2.46229	2.11404	2.9897	2.52201	0.359973
36	cyp11b	34.91	34.92	34.02	22.36	22.32	22.32	12.55	12.6	11.7	12.2833	0.412984		35.97	35.61	36.15	22.05	21.98	22.06	13.92	13.63	14.09	13.88	0.189912		0.007665	**	-1.37	-1.03	-2.39	-1.59667	0.577889		0.386891	0.48971	0.190782	0.355795	0.124002
37	hsd3b	37.32	37.03	37.49	24.14	24.18	24.04	13.18	12.85	13.45	13.16	0.245357		36.69	37.41	37.25	23.85	23.75	23.83	12.84	13.66	13.42	13.3067	0.344222		0.649354		0.34	-0.81	0.03	-0.146667	0.485821		1.26576	0.570382	1.02101	0.952384	0.288003
38	hsd20b	29.09	29.13	29.32	22.36	22.32	22.32	6.73	6.81	7	6.84667	0.113235		28.98	28.71	28.89	22.05	21.98	22.06	6.93	6.73	6.83	6.83	0.0816497		0.874118		-0.2	0.08	0.17	0.0166667	0.157551		0.870551	1.05702	1.12506	1.01754	0.107587
39	hsd17b3	32.93	33.09	32.74	22.36	22.32	22.32	10.57	10.77	10.42	10.5867	0.143372		32.62	32.85	32.35	22.05	21.98	22.06	10.57	10.87	10.29	10.5767	0.236831		0.961709		3.55271e-15	-0.1	0.13	0.01	0.094163		1	0.933033	1.09429	1.00911	0.0661487
40	hsd11b2	32	31.83	31.89	22.36	22.32	22.32	9.64	9.51	9.57	9.57333	0.0531246		31.61	31.85	31.45	22.05	21.98	22.06	9.56	9.87	9.39	9.60667	0.198718		0.829974		0.08	-0.36	0.18	-0.0333333	0.234568		1.05702	0.779165	1.13288	0.989689	0.152051
41	gnrh2	34.04	34.57	34.61	22.36	22.32	22.32	11.68	12.25	12.29	12.0733	0.278608		34.65	34.52	34.96	22.05	21.98	22.06	12.6	12.54	12.9	12.68	0.15748		0.055181		-0.92	-0.29	-0.61	-0.606667	0.257207		0.528509	0.817902	0.655197	0.667203	0.118449
42	gnrh3	32.1	32.05	32.05	22.36	22.32	22.32	9.74	9.73	9.73	9.73333	0.00471405		31.19	31.18	31.05	22.05	21.98	22.06	9.14	9.2	8.99	9.11	0.0883176		0.009731	**	0.6	0.53	0.74	0.623333	0.0873053		1.51572	1.44393	1.67018	1.54327	0.0943979
43	fshb	38.51	40.13	40.03	22.36	22.32	22.32	16.15	17.81	17.71	17.2233	0.760058		37.96	37.98	38.37	22.05	21.98	22.06	15.91	16	16.31	16.0733	0.171335		0.160261		0.24	1.81	1.4	1.15	0.664881		1.18099	3.50642	2.63902	2.44214	0.959505
44	lhb	36.08	40.55	37.62	23.06	23.01	23.02	13.02	17.54	14.6	15.0533	1.87292		40.38	38.25	36.02	22.64	22.78	23.17	17.74	15.47	12.85	15.3533	1.99804		0.884388		-4.72	2.07	1.75	-0.3	3.12814		0.0379436	4.19887	3.36359	2.53347	1.79725
45	crh	33.12	32.94	32.61	22.36	22.32	22.32	10.76	10.62	10.29	10.5567	0.197034		32.68	32.69	32.73	22.05	21.98	22.06	10.63	10.71	10.67	10.67	0.0326599		0.467233		0.13	-0.09	-0.38	-0.113333	0.208859		1.09429	0.939523	0.768438	0.934085	0.133086
46	pomc	33.15	32.25	32.69	20.53	20.24	20.07	12.62	12.01	12.62	12.4167	0.287557		36.56	35.01	35.91	23.28	23.34	23.4	13.28	11.67	12.51	12.4867	0.657487		0.896946		-0.66	0.34	0.11	-0.07	0.427629		0.632878	1.26576	1.07923	0.992621	0.26553
47	trh	32.91	32.92	32.65	20.53	20.24	20.07	12.38	12.68	12.58	12.5467	0.124722		34.4	34.03	33.83	23.28	23.34	23.4	11.12	10.69	10.43	10.7467	0.284527		0.001208	**	1.26	1.99	2.15	1.8	0.387384		2.39496	3.97237	4.43828	3.60187	0.874354
48	tshb	34.17	34.83	34.57	23.06	23.01	23.02	11.11	11.82	11.55	11.4933	0.292613		33.58	33.36	34.2	22.64	22.78	23.17	10.94	10.58	11.03	10.85	0.194422		0.060701		0.17	1.24	0.52	0.643333	0.445446		1.12506	2.36199	1.43396	1.64033	0.525637
49	nis	35.78	34.99	36.1	24.47	24.47	24.93	11.31	10.52	11.17	11	0.34419		32.53	32.56	32.79	22.26	22.55	22.3	10.27	10.01	10.49	10.2567	0.196186		0.056777		1.04	0.51	0.68	0.743333	0.220958		2.05623	1.42405	1.60214	1.69414	0.266158
50	tg	32.29	32.42	32.62	24.47	24.47	24.93	7.82	7.95	7.69	7.82	0.106145		30.23	30.51	30.14	22.26	22.55	22.3	7.97	7.96	7.84	7.92333	0.0590668		0.295298		-0.15	-0.01	-0.15	-0.103333	0.0659966		0.90125	0.993092	0.90125	0.931864	0.0432947
51	dio1	28.56	28.9	28.86	24.47	24.47	24.93	4.09	4.43	3.93	4.15	0.208487		26.58	27.14	27.05	22.26	22.55	22.3	4.32	4.59	4.75	4.55333	0.177451		0.105613		-0.23	-0.16	-0.82	-0.403333	0.296011		0.852635	0.895025	0.566442	0.771367	0.145934
52	dio2	34.13	34.63	33.46	24.47	24.47	24.93	9.66	10.16	8.53	9.45	0.681811		32.25	31.99	32.05	22.26	22.55	22.3	9.99	9.44	9.75	9.72667	0.225142		0.614766		-0.33	0.72	-1.22	-0.276667	0.792899		0.795536	1.64718	0.429283	0.957334	0.510198
53	thra	32.33	32.01	32.23	24.47	24.47	24.93	7.86	7.54	7.3	7.56667	0.229395		30.01	30.08	30.19	22.26	22.55	22.3	7.75	7.53	7.89	7.72333	0.148174		0.462703		0.11	0.01	-0.59	-0.156667	0.309121		1.07923	1.00696	0.664343	0.916842	0.180965
54	thrb	32.6	32.49	32.3	24.47	24.47	24.93	8.13	8.02	7.37	7.84	0.335361		30.75	30.66	31.29	22.26	22.55	22.3	8.49	8.11	8.99	8.53	0.36037		0.118497		-0.36	-0.09	-1.62	-0.69	0.666783		0.779165	0.939523	0.325335	0.681341	0.260107
55	amh	36.96	40.69	36.6	23.06	23.01	23.02	13.9	17.68	13.58	15.0533	1.86192		36.16	37.42	35.25	22.64	22.78	23.17	13.52	14.64	12.08	13.4133	1.04783		0.338722		0.38	3.04	1.5	1.64	1.09044		1.30134	8.22491	2.82843	4.11823	2.97003
56	dmrt1	35.67	35.23	35.13	24.14	24.18	24.04	11.53	11.05	11.09	11.2233	0.21746		36.38	36.27	35.75	23.85	23.75	23.83	12.53	12.52	11.92	12.3233	0.285229		0.01228	*	-1	-1.47	-0.83	-1.1	0.270678		0.5	0.360982	0.562529	0.474504	0.0842331
57	sox9a	28.42	28.5	28.63	24.14	24.18	24.04	4.28	4.32	4.59	4.39667	0.137679		29.8	29.24	29.21	23.85	23.75	23.83	5.95	5.49	5.38	5.60667	0.246892		0.003758	**	-1.67	-1.17	-0.79	-1.21	0.36037		0.314253	0.444421	0.578344	0.445673	0.107818
58	sox9b	29.25	29.2	29.32	24.14	24.18	24.04	5.11	5.02	5.28	5.13667	0.107806		29.77	29.56	29.88	23.85	23.75	23.83	5.92	5.81	6.05	5.92667	0.0980929		0.001557	**	-0.81	-0.79	-0.77	-0.79	0.0163299		0.570382	0.578344	0.586417	0.578381	0.00654657
59	tnfα	38.68	39.27	39.02	23.06	23.01	23.02	15.62	16.26	16	15.96	0.262805		39.3	39.42	39.36	22.64	22.78	23.17	16.66	16.64	16.19	16.4967	0.217		0.089921		-1.04	-0.38	-0.19	-0.536667	0.364265		0.486327	0.768438	0.876606	0.710457	0.164521
60	ifn	35.98	35.19	35.62	23.06	23.01	23.02	12.92	12.18	12.6	12.5667	0.303022		36.56	36.75	36.14	22.64	22.78	23.17	13.92	13.97	12.97	13.62	0.460072		0.05387		-1	-1.79	-0.37	-1.05333	0.580938		0.5	0.289172	0.773782	0.520985	0.198397
61	il-1β	33.57	34.03	33.99	24.14	24.18	24.04	9.43	9.85	9.95	9.74333	0.22529		34.08	34.06	34.19	23.85	23.75	23.83	10.23	10.31	10.36	10.3	0.0535413		0.027285	*	-0.8	-0.46	-0.41	-0.556667	0.173269		0.574349	0.726986	0.752623	0.684653	0.0786956
62	il-8	31.54	31.42	31.26	24.14	24.18	24.04	7.4	7.24	7.22	7.28667	0.0805536		31.86	31.54	31.24	23.85	23.75	23.83	8.01	7.79	7.41	7.73667	0.247835		0.07105		-0.61	-0.55	-0.19	-0.45	0.185472		0.655197	0.68302	0.876606	0.738274	0.0984725
63	cxcl-clc	33.35	34.17	32.81	24.14	24.18	24.04	9.21	9.99	8.77	9.32333	0.504469		33.5	34	33.99	23.85	23.75	23.83	9.65	10.25	10.16	10.02	0.264197		0.158662		-0.44	-0.26	-1.39	-0.696667	0.495737		0.737135	0.835088	0.381565	0.651262	0.194853
64	cc-chemokine	35.27	34.16	34.89	24.14	24.18	24.04	11.13	9.98	10.85	10.6533	0.489648		34.69	36.86	34.01	23.85	23.75	23.83	10.84	13.11	10.18	11.3767	1.25492		0.48991		0.29	-3.13	0.67	-0.723333	1.70883		1.22264	0.114229	1.59107	0.975981	0.62764
65	inos	38.3	38.25	38.07	24.14	24.18	24.04	14.16	14.07	14.03	14.0867	0.054365		39.19	39.6	39.58	23.85	23.75	23.83	15.34	15.85	15.75	15.6467	0.220656		0.00063	***	-1.18	-1.78	-1.72	-1.56	0.269815		0.441351	0.291183	0.303549	0.345361	0.0680629
66	bcl2	28.84	28.94	28.63	24.14	24.18	24.04	4.7	4.76	4.59	4.68333	0.0703957		29.23	29.72	29.77	23.85	23.75	23.83	5.38	5.97	5.94	5.76333	0.271334		0.02416	*	-0.68	-1.21	-1.35	-1.08	0.28856		0.624165	0.432269	0.392292	0.482909	0.101208
67	ucp2	25.66	25.12	25.11	24.14	24.18	24.04	1.52	0.94	1.07	1.17667	0.248507		25.66	25.64	25.74	23.85	23.75	23.83	1.81	1.89	1.91	1.87	0.0432049		0.017731	*	-0.29	-0.95	-0.84	-0.693333	0.288714		0.817902	0.517632	0.558644	0.631393	0.132941
68	hsd3b1	39.42	39.53	39.29	23.06	23.01	23.02	16.36	16.52	16.27	16.3833	0.103387		38.89	39.62	39.88	22.64	22.78	23.17	16.25	16.84	16.71	16.6	0.253114		0.325156		0.11	-0.32	-0.44	-0.216667	0.236126		1.07923	0.80107	0.737135	0.872478	0.148507
69	hsd11b3a	30.33	30.53	30.18	24.47	24.47	24.93	5.86	6.06	5.25	5.72333	0.344513		28.5	28.9	28.51	22.26	22.55	22.3	6.24	6.35	6.21	6.26667	0.0601849		0.092954		-0.38	-0.29	-0.96	-0.543333	0.29691		0.768438	0.817902	0.514057	0.700132	0.133116
70	ihcgr	37.05	37.09	36.12	24.47	24.47	24.93	12.58	12.62	11.19	12.13	0.664881		36.68	35.27	34.93	22.26	22.55	22.3	14.42	12.72	12.63	13.2567	0.823421		0.20665		-1.84	-0.1	-1.44	-1.12667	0.744103		0.279322	0.933033	0.368567	0.526974	0.289429
71	fshr	39.82	39.51	40.73	23.06	23.01	23.02	16.76	16.5	17.71	16.99	0.520064		40.21	40.36	40.57	22.64	22.78	23.17	17.57	17.58	17.4	17.5167	0.0825967		0.287245		-0.81	-1.08	0.31	-0.526667	0.601794		0.570382	0.473029	1.23971	0.761039	0.340795
72	igf3	36.96	35.98	36.65	23.06	23.01	23.02	13.9	12.97	13.63	13.5	0.39064		36.33	36.33	36.12	22.64	22.78	23.17	13.69	13.55	12.95	13.3967	0.320971		0.786913		0.21	-0.58	0.68	0.103333	0.519893		1.15669	0.668964	1.60214	1.1426	0.381098
73	piwil1	39.11	37.16	37.23	23.06	23.01	23.02	16.05	14.15	14.21	14.8033	0.881867		37.47	38.99	39.61	22.64	22.78	23.17	14.83	16.21	16.44	15.8267	0.710977		0.270508		1.22	-2.06	-2.23	-1.02333	1.58779		2.32947	0.239816	0.213159	0.927481	0.991414
Exposure at 7dpf		10000 ng/L
	Gene	Control												Treatment-10000ng/L												Control vs Treatment-10000ng/L
		Target Gene			Reference Gene (β-actin)			ΔCt						Target Gene			Reference Gene (β-actin)			ΔCt						Independent t test								Fold change
No.		Ct-1	Ct-2	Ct-3	Ct-1	Ct-2	Ct-3	ΔCt-1C	ΔCt-2C	ΔCt-3C	ΔCt-C-A	ΔCt-C-SD		Ct-1	Ct-2	Ct-3	Ct-1	Ct-2	Ct-3	ΔCt-1T	ΔCt-2T	ΔCt-3T	ΔCt-T-A	ΔCt-T-SD		p		‒ΔΔCt-1	‒ΔΔCt-2	‒ΔΔCt-3	‒ΔΔCt-A	‒ΔΔCt-SD		2‒ΔΔCt-1	2‒ΔΔCt-2	2‒ΔΔCt-3	2‒ΔΔCt-A	2‒ΔΔCt-SD
1	mprα	28.67	28.63	28.58	22.3	22.19	22.22	6.37	6.44	6.36	6.39	0.0355903		32.05	32.12	32.39	23.57	23.84	23.49	8.48	8.28	8.9	8.55333	0.258371		0.000302	***	-2.11	-1.84	-2.54	-2.16333	0.288251		0.231647	0.279322	0.171943	0.227637	0.0439289
2	mprβ	31.78	31.69	31.46	22.3	22.19	22.22	9.48	9.5	9.24	9.40667	0.118134		32.77	32.36	32.58	23.57	23.84	23.49	9.2	8.52	9.09	8.93667	0.298031		0.106829		0.28	0.98	0.15	0.47	0.364509		1.21419	1.97247	1.10957	1.43208	0.384492
3	esr2a	33.31	33.43	33	22.3	22.19	22.22	11.01	11.24	10.78	11.01	0.187794		36.5	36.57	37.34	23.57	23.84	23.49	12.93	12.73	13.85	13.17	0.487716		0.004273	**	-1.92	-1.49	-3.07	-2.16	0.666983		0.264255	0.356013	0.11908	0.246449	0.0975434
4	esr2b	34.9	34.88	35.19	22.3	22.19	22.22	12.6	12.69	12.97	12.7533	0.157551		33.74	34.1	33.94	23.57	23.84	23.49	10.17	10.26	10.45	10.2933	0.116714		5.9e-05	***	2.43	2.43	2.52	2.46	0.0424264		5.38893	5.38893	5.73582	5.50456	0.163524
5	cyp19a1b	35.74	36.02	35.89	25.41	25.7	25.4	10.33	10.32	10.49	10.38	0.0778888		33.71	34.22	33.31	20.68	20.64	21.44	13.03	13.58	11.87	12.8267	0.712757		0.008487	**	-2.7	-3.26	-1.38	-2.44667	0.788134		0.153893	0.104386	0.384219	0.214166	0.121932
6	clock1a	30.2	30.55	30.46	22.3	22.19	22.22	7.9	8.36	8.24	8.16667	0.194822		32.83	32.65	32.93	23.57	23.84	23.49	9.26	8.81	9.44	9.17	0.264953		0.012501	*	-1.36	-0.45	-1.2	-1.00333	0.396681		0.389582	0.732043	0.435275	0.518967	0.151818
7	clock1b	27.38	27.38	27.27	22.3	22.19	22.22	5.08	5.19	5.05	5.10667	0.0601849		28.25	28.16	28.12	23.57	23.84	23.49	4.68	4.32	4.63	4.54333	0.159234		0.009448	**	0.4	0.87	0.42	0.563333	0.217		1.31951	1.82766	1.33793	1.49503	0.235325
8	clock2	29.78	29.57	29.56	22.3	22.19	22.22	7.48	7.38	7.34	7.4	0.0588784		31.44	31.13	31.11	23.57	23.84	23.49	7.87	7.29	7.62	7.59333	0.237534		0.326464		-0.39	0.09	-0.28	-0.193333	0.205318		0.76313	1.06437	0.823591	0.883697	0.130118
9	arntl1a	28.75	28.88	28.9	22.3	22.19	22.22	6.45	6.69	6.68	6.60667	0.110855		29.69	29.58	29.29	23.57	23.84	23.49	6.12	5.74	5.8	5.88667	0.1668		0.00706	**	0.33	0.95	0.88	0.72	0.277248		1.25701	1.93187	1.84038	1.67642	0.298909
10	arntl1b	31.41	31.15	31.03	22.3	22.19	22.22	9.11	8.96	8.81	8.96	0.122474		33.09	33.23	32.94	23.57	23.84	23.49	9.52	9.39	9.45	9.45333	0.0531246		0.006401	**	-0.41	-0.43	-0.64	-0.493333	0.10403		0.752623	0.742262	0.641713	0.712199	0.0500206
11	arntl2	30.72	30.78	30.42	22.3	22.19	22.22	8.42	8.59	8.2	8.40333	0.159652		33.21	33.88	33.25	23.57	23.84	23.49	9.64	10.04	9.76	9.81333	0.167597		0.000998	***	-1.22	-1.45	-1.56	-1.41	0.141657		0.429283	0.366021	0.339151	0.378152	0.0377826
12	nr1d1	25	24.93	25	22.3	22.19	22.22	2.7	2.74	2.78	2.74	0.0326599		27.26	27.26	27.26	23.57	23.84	23.49	3.69	3.42	3.77	3.62667	0.149741		0.001215	**	-0.99	-0.68	-0.99	-0.886667	0.146135		0.503478	0.624165	0.503478	0.543707	0.0568926
13	nr1d2a	26.77	26.75	26.84	22.3	22.19	22.22	4.47	4.56	4.62	4.55	0.0616441		28.64	28.88	28.77	23.57	23.84	23.49	5.07	5.04	5.28	5.13	0.106771		0.002651	**	-0.6	-0.48	-0.66	-0.58	0.0748331		0.659754	0.716978	0.632878	0.66987	0.0350706
14	nr1d2b	27.2	27.14	27.22	22.3	22.19	22.22	4.9	4.95	5	4.95	0.0408248		29.81	29.71	29.89	23.57	23.84	23.49	6.24	5.87	6.4	6.17	0.221961		0.001573	**	-1.34	-0.92	-1.4	-1.22	0.213542		0.395021	0.528509	0.378929	0.434153	0.0670425
15	per1a	29.33	29.19	29.46	22.3	22.19	22.22	7.03	7	7.24	7.09	0.106771		32.42	32.14	32.17	23.57	23.84	23.49	8.85	8.3	8.68	8.61	0.229928		0.00106	**	-1.82	-1.3	-1.44	-1.52	0.219697		0.283221	0.406126	0.368567	0.352638	0.0514246
16	per1b	25.56	25.44	25.51	22.82	22.65	22.53	2.74	2.79	2.98	2.83667	0.103387		26.97	26.97	26.85	24.7	24.57	24.61	2.27	2.4	2.24	2.30333	0.0694422		0.003752	**	0.47	0.39	0.74	0.533333	0.149741		1.38511	1.31039	1.67018	1.45523	0.155023
17	per2	28.53	28.28	28.32	22.82	22.65	22.53	5.71	5.63	5.79	5.71	0.0653197		30.67	30.61	30.78	24.7	24.57	24.61	5.97	6.04	6.17	6.06	0.0828654		0.00937	**	-0.26	-0.41	-0.38	-0.35	0.0648074		0.835088	0.752623	0.768438	0.785383	0.0357348
18	per3	27.02	27.1	26.96	22.82	22.65	22.53	4.2	4.45	4.43	4.36	0.113431		28.71	28.86	29.07	24.7	24.57	24.61	4.01	4.29	4.46	4.25333	0.185532		0.526055		0.19	0.16	-0.03	0.106667	0.0974109		1.14076	1.11729	0.97942	1.07916	0.0711728
19	cry1a	28.04	28.26	28.16	22.82	22.65	22.53	5.22	5.61	5.63	5.48667	0.188739		31.48	31.09	31.11	24.7	24.57	24.61	6.78	6.52	6.5	6.6	0.127541		0.002298	**	-1.56	-0.91	-0.87	-1.11333	0.316263		0.339151	0.532185	0.547147	0.472828	0.0947208
20	cry1b	30.29	30.3	30.18	22.82	22.65	22.53	7.47	7.65	7.65	7.59	0.0848528		32.43	32.63	32.63	24.7	24.57	24.61	7.73	8.06	8.02	7.93667	0.147045		0.044663	*	-0.26	-0.41	-0.37	-0.346667	0.063421		0.835088	0.752623	0.773782	0.787165	0.0349706
21	cry2a	27.33	26.8	26.86	22.82	22.65	22.53	4.51	4.15	4.33	4.33	0.146969		29.16	29.11	29.05	24.7	24.57	24.61	4.46	4.54	4.44	4.48	0.0432049		0.238351		0.05	-0.39	-0.11	-0.15	0.181842		1.03526	0.76313	0.926588	0.908328	0.111847
22	cry2b	31.92	32.16	31.55	22.82	22.65	22.53	9.1	9.51	9.02	9.21	0.214631		35.22	35.15	35.29	24.7	24.57	24.61	10.52	10.58	10.68	10.5933	0.0659966		0.000956	***	-1.42	-1.07	-1.66	-1.38333	0.242258		0.373712	0.476319	0.316439	0.388823	0.0661395
23	cry3	26.86	27.08	27.04	22.82	22.65	22.53	4.04	4.43	4.51	4.32667	0.205318		28.73	29.06	28.57	24.7	24.57	24.61	4.03	4.49	3.96	4.16	0.235089		0.492184		0.01	-0.06	0.55	0.166667	0.27256		1.00696	0.959264	1.46409	1.14344	0.227569
24	cry4	30.19	30.28	30.36	22.82	22.65	22.53	7.37	7.63	7.83	7.61	0.188326		32.43	32.47	32.58	24.7	24.57	24.61	7.73	7.9	7.97	7.86667	0.100775		0.16447		-0.36	-0.27	-0.14	-0.256667	0.0903081		0.779165	0.82932	0.907519	0.838668	0.0528158
25	cry5	27.42	27.33	27.41	22.82	22.65	22.53	4.6	4.68	4.88	4.72	0.117757		28.97	28.93	29.17	24.7	24.57	24.61	4.27	4.36	4.56	4.39667	0.121198		0.053762		0.33	0.32	0.32	0.323333	0.00471405		1.25701	1.24833	1.24833	1.25122	0.00409312
26	pgr	36.13	36.57	35.87	25.41	25.7	25.4	10.72	10.87	10.47	10.6867	0.164992		34.79	34.23	34.05	20.68	20.64	21.44	14.11	13.59	12.61	13.4367	0.621897		0.003779	**	-3.39	-2.72	-2.14	-2.75	0.510751		0.0953912	0.151774	0.22688	0.158015	0.0538611
27	esr1	37.76	37.03	37.63	25.41	25.7	25.4	12.35	11.33	12.23	11.97	0.455192		33.18	35.22	34.23	20.68	20.64	21.44	12.5	14.58	12.79	13.29	0.919819		0.143052		-0.15	-3.25	-0.56	-1.32	1.37494		0.90125	0.105112	0.678302	0.561555	0.335342
28	vtg1	36.29	37.66	36.87	25.41	25.7	25.4	10.88	11.96	11.47	11.4367	0.441538		34.92	35.57	34.9	20.68	20.64	21.44	14.24	14.93	13.46	14.21	0.6005		0.006246	**	-3.36	-2.97	-1.99	-2.77333	0.576329		0.0973956	0.127627	0.251739	0.15892	0.0667829
29	ar	29.08	29.06	28.92	22.82	22.65	22.53	6.26	6.41	6.39	6.35333	0.0664998		31.23	31.23	31.27	24.7	24.57	24.61	6.53	6.66	6.66	6.61667	0.0612826		0.014634	*	-0.27	-0.25	-0.27	-0.263333	0.00942809		0.82932	0.840896	0.82932	0.833179	0.00545739
30	mr	29.07	29.19	29.12	22.82	22.65	22.53	6.25	6.54	6.59	6.46	0.149889		31.25	31.56	31.43	24.7	24.57	24.61	6.55	6.99	6.82	6.78667	0.181169		0.120899		-0.3	-0.45	-0.23	-0.326667	0.0917727		0.812252	0.732043	0.852635	0.798977	0.0501185
31	gr	30.04	29.78	29.95	23.26	23.22	23.31	6.78	6.56	6.64	6.66	0.0909212		30.2	30.23	30.32	24.38	24.28	24.33	5.82	5.95	5.99	5.92	0.0725718		0.000845	***	0.96	0.61	0.65	0.74	0.156418		1.94531	1.52626	1.56917	1.68025	0.188245
32	star	30.32	30.83	30.18	23.26	23.22	23.31	7.06	7.61	6.87	7.18	0.313794		30.91	31.15	31.16	24.38	24.28	24.33	6.53	6.87	6.83	6.74333	0.151731		0.151135		0.53	0.74	0.04	0.436667	0.293295		1.44393	1.67018	1.02811	1.38074	0.265902
33	cyp11a1	38.2	37.78	39.9	23.26	23.22	23.31	14.94	14.56	16.59	15.3633	0.881148		39.19	38.49	39.01	24.38	24.28	24.33	14.81	14.21	14.68	14.5667	0.257725		0.287032		0.13	0.35	1.91	0.796667	0.792352		1.09429	1.27456	3.75809	2.04232	1.21547
34	cyp17a1	32.89	33.6	33.07	23.26	23.22	23.31	9.63	10.38	9.76	9.92333	0.327244		33.12	33.12	33.87	24.38	24.28	24.33	8.74	8.84	9.54	9.04	0.355903		0.061082		0.89	1.54	0.22	0.883333	0.538908		1.85318	2.90795	1.16473	1.97528	0.716882
35	cyp19a1a	38.63	38.61	37.79	23.3	23.26	23.27	15.33	15.35	14.52	15.0667	0.386638		39.21	38.13	38.87	21.19	21.06	21.14	18.02	17.07	17.73	17.6067	0.39752		0.002927	**	-2.69	-1.72	-3.21	-2.54	0.617468		0.154963	0.303549	0.108067	0.18886	0.0833266
36	cyp11b	34.94	35.75	34.25	23.26	23.22	23.31	11.68	12.53	10.94	11.7167	0.649632		35.54	35.34	35.51	24.38	24.28	24.33	11.16	11.06	11.18	11.1333	0.0524934		0.274303		0.52	1.47	-0.24	0.583333	0.69954		1.43396	2.77022	0.846745	1.68364	0.804858
37	hsd3b	36.01	36.68	35.93	23.3	23.26	23.27	12.71	13.42	12.66	12.93	0.347083		35.78	34.94	35.47	21.19	21.06	21.14	14.59	13.88	14.33	14.2667	0.293295		0.014146	*	-1.88	-0.46	-1.67	-1.33667	0.625797		0.271684	0.726986	0.314253	0.437641	0.205335
38	hsd20b	27.77	27.73	28.03	23.26	23.22	23.31	4.51	4.51	4.72	4.58	0.0989949		28.16	28.07	28.22	24.38	24.28	24.33	3.78	3.79	3.89	3.82	0.0496655		0.000631	***	0.73	0.72	0.83	0.76	0.0496655		1.65864	1.64718	1.77769	1.6945	0.0590051
39	hsd17b3	32.93	33.45	33.32	23.26	23.22	23.31	9.67	10.23	10.01	9.97	0.230362		33.02	33.12	33.46	24.38	24.28	24.33	8.64	8.84	9.13	8.87	0.201163		0.007048	**	1.03	1.39	0.88	1.1	0.214009		2.04202	2.62079	1.84038	2.16773	0.330769
40	hsd11b2	29.52	29.72	29.53	23.26	23.22	23.31	6.26	6.5	6.22	6.32667	0.123648		30.69	30.59	30.45	24.38	24.28	24.33	6.31	6.31	6.12	6.24667	0.0895669		0.49983		-0.05	0.19	0.1	0.08	0.0989949		0.965936	1.14076	1.07177	1.05949	0.0718994
41	gnrh2	32.41	32.95	32.58	23.26	23.22	23.31	9.15	9.73	9.27	9.38333	0.249978		33.01	32.74	33.27	24.38	24.28	24.33	8.63	8.46	8.94	8.67667	0.198718		0.035202	*	0.52	1.27	0.33	0.706667	0.405819		1.43396	2.41162	1.25701	1.70086	0.507744
42	gnrh3	30.55	30.61	30.91	23.26	23.22	23.31	7.29	7.39	7.6	7.42667	0.129185		31.39	31.45	31.33	24.38	24.28	24.33	7.01	7.17	7	7.06	0.0778888		0.026354	*	0.28	0.22	0.6	0.366667	0.1668		1.21419	1.16473	1.51572	1.29822	0.155117
43	fshb	36.03	38.19	38.08	23.3	23.26	23.27	12.73	14.93	14.81	14.1567	1.00999		36.35	35.64	36.79	21.19	21.06	21.14	15.16	14.58	15.65	15.13	0.43734		0.279221		-2.43	0.35	-0.84	-0.973333	1.13884		0.185565	1.27456	0.558644	0.672923	0.451865
44	lhb	36.98	36.16	37.12	23.3	23.26	23.27	13.68	12.9	13.85	13.4767	0.413629		34.96	35.32	36.4	21.19	21.06	21.14	13.77	14.26	15.26	14.43	0.620054		0.144745		-0.09	-1.36	-1.41	-0.953333	0.61081		0.939523	0.389582	0.376312	0.568472	0.262428
45	crh	30.59	30.38	30.35	23.26	23.22	23.31	7.33	7.16	7.04	7.17667	0.118977		31.59	32.43	31.91	24.38	24.28	24.33	7.21	8.15	7.58	7.64667	0.386638		0.175708		0.12	-0.99	-0.54	-0.47	0.455851		1.08673	0.503478	0.687771	0.759328	0.24343
46	pomc	36.03	37.05	36.05	25.41	25.7	25.4	10.62	11.35	10.65	10.8733	0.337277		31.45	31.34	31.64	20.68	20.64	21.44	10.77	10.7	10.2	10.5567	0.253815		0.348528		-0.15	0.65	0.45	0.316667	0.339935		0.90125	1.56917	1.36604	1.27882	0.279564
47	trh	35.18	35.97	35.1	25.41	25.7	25.4	9.77	10.27	9.7	9.91333	0.253815		31.77	32.08	31.98	20.68	20.64	21.44	11.09	11.44	10.54	11.0233	0.370435		0.024991	*	-1.32	-1.17	-0.84	-1.11	0.200499		0.400535	0.444421	0.558644	0.467867	0.0666426
48	tshb	36.53	37.76	37.45	25.41	25.7	25.4	11.12	12.06	12.05	11.7433	0.440782		33.48	33.08	32.95	20.68	20.64	21.44	12.8	12.44	11.51	12.25	0.543507		0.363743		-1.68	-0.38	0.54	-0.506667	0.910726		0.312083	0.768438	1.45397	0.844831	0.469294
49	nis	35.22	36.46	34.78	25.41	25.7	25.4	9.81	10.76	9.38	9.98333	0.576561		31.65	31.4	31.65	20.68	20.64	21.44	10.97	10.76	10.21	10.6467	0.320451		0.228049		-1.16	3.55271e-15	-0.83	-0.663333	0.488012		0.447513	1	0.562529	0.670014	0.238013
50	tg	33.41	33.91	33.43	25.41	25.7	25.4	8	8.21	8.03	8.08	0.0927362		29.71	29.52	29.53	20.68	20.64	21.44	9.03	8.88	8.09	8.66667	0.412338		0.121126		-1.03	-0.67	-0.06	-0.586667	0.400361		0.48971	0.628507	0.959264	0.692494	0.196962
51	dio1	29.39	29.66	29.57	25.41	25.7	25.4	3.98	3.96	4.17	4.03667	0.0946338		25.42	25.04	24.91	20.68	20.64	21.44	4.74	4.4	3.47	4.20333	0.536801		0.687729		-0.76	-0.44	0.7	-0.166667	0.626596		0.590496	0.737135	1.6245	0.984045	0.456813
52	dio2	35.63	35.68	35.4	25.41	25.7	25.4	10.22	9.98	10	10.0667	0.10873		31.29	31.28	31.37	20.68	20.64	21.44	10.61	10.64	9.93	10.3933	0.327855		0.252058		-0.39	-0.66	0.07	-0.326667	0.301367		0.76313	0.632878	1.04972	0.815242	0.174117
53	thra	34.29	33.14	33.65	25.41	25.7	25.4	8.88	7.44	8.25	8.19	0.589406		29.17	29.24	29.13	20.68	20.64	21.44	8.49	8.6	7.69	8.26	0.405545		0.896636		0.39	-1.16	0.56	-0.07	0.773865		1.31039	0.447513	1.47427	1.07739	0.450388
54	thrb	33.48	34.28	33.89	25.41	25.7	25.4	8.07	8.58	8.49	8.38	0.222261		29.87	29.5	29.37	20.68	20.64	21.44	9.19	8.86	7.93	8.66	0.533479		0.530879		-1.12	-0.28	0.56	-0.28	0.685857		0.460094	0.823591	1.47427	0.919318	0.419532
55	amh	36.97	38.83	37.49	23.3	23.26	23.27	13.67	15.57	14.22	14.4867	0.798262		36.2	36.05	35.5	21.19	21.06	21.14	15.01	14.99	14.36	14.7867	0.301809		0.645176		-1.34	0.58	-0.14	-0.3	0.79196		0.395021	1.49485	0.907519	0.932463	0.449349
56	dmrt1	34.21	35.13	34.41	23.14	23.08	23.1	11.07	12.05	11.31	11.4767	0.41708		34.8	33.84	34.39	24.48	24.35	24.89	10.32	9.49	9.5	9.77	0.38893		0.013346	*	0.75	2.56	1.81	1.70667	0.742533		1.68179	5.89708	3.50642	3.6951	1.72605
57	sox9a	28.3	28.21	28.15	23.14	23.08	23.1	5.16	5.13	5.05	5.11333	0.046428		29	28.98	28.89	24.48	24.35	24.89	4.52	4.63	4	4.38333	0.274752		0.060359		0.64	0.5	1.05	0.73	0.233381		1.55833	1.41421	2.07053	1.68102	0.281636
58	sox9b	29.64	29.43	29.54	23.14	23.08	23.1	6.5	6.35	6.44	6.43	0.0616441		29.12	29.04	29.18	24.48	24.35	24.89	4.64	4.69	4.29	4.54	0.177951		0.000143	***	1.86	1.66	2.15	1.89	0.201163		3.63008	3.16017	4.43828	3.74284	0.527844
59	tnfα	38.95	39.15	40.28	24.12	24.17	24.11	14.83	14.98	16.17	15.3267	0.599463		35.22	36.03	35.84	20.13	20.11	20.24	15.09	15.92	15.6	15.5367	0.341793		0.689095		-0.26	-0.94	0.57	-0.21	0.617468		0.835088	0.521233	1.48452	0.946948	0.401137
60	ifn	37.21	37.54	38.26	23.14	23.08	23.1	14.07	14.46	15.16	14.5633	0.45095		37.2	36.87	38.4	24.48	24.35	24.89	12.72	12.52	13.51	12.9167	0.427421		0.019981	*	1.35	1.94	1.65	1.64667	0.240878		2.54912	3.83706	3.13834	3.17484	0.52643
61	il-1β	33.2	33.01	33.12	23.14	23.08	23.1	10.06	9.93	10.02	10.0033	0.054365		32.87	32.85	32.79	24.48	24.35	24.89	8.39	8.5	7.9	8.26333	0.260811		0.000764	***	1.67	1.43	2.12	1.74	0.286007		3.18215	2.69447	4.34694	3.40785	0.69324
62	il-8	31.02	30.44	30.85	23.14	23.08	23.1	7.88	7.36	7.75	7.66333	0.220958		31.26	31.13	31.36	24.48	24.35	24.89	6.78	6.78	6.47	6.67667	0.146135		0.006224	**	1.1	0.58	1.28	0.986667	0.296798		2.14355	1.49485	2.42839	2.02226	0.390646
63	cxcl-clc	32.45	32.59	32.33	23.14	23.08	23.1	9.31	9.51	9.23	9.35	0.117757		32.94	32.49	32.51	24.48	24.35	24.89	8.46	8.14	7.62	8.07333	0.346153		0.007828	**	0.85	1.37	1.61	1.27667	0.31721		1.8025	2.58471	3.05252	2.47991	0.51567
64	cc-chemokine	33.79	33.82	33.22	23.14	23.08	23.1	10.65	10.74	10.12	10.5033	0.273537		33.94	34.32	34.26	24.48	24.35	24.89	9.46	9.97	9.37	9.6	0.264197		0.028324	*	1.19	0.77	0.75	0.903333	0.202868		2.28153	1.70527	1.68179	1.88953	0.27735
65	inos	38.25	37.3	37.91	23.3	23.26	23.27	14.95	14.04	14.64	14.5433	0.377742		36.02	35.02	35.75	21.19	21.06	21.14	14.83	13.96	14.61	14.4667	0.369354		0.847416		0.12	0.08	0.03	0.0766667	0.0368179		1.08673	1.05702	1.02101	1.05492	0.0268721
66	bcl2	28.48	28.5	28.55	23.14	23.08	23.1	5.34	5.42	5.45	5.40333	0.046428		27.75	27.72	27.75	24.48	24.35	24.89	3.27	3.37	2.86	3.16667	0.220656		0.00015	***	2.07	2.05	2.59	2.23667	0.249978		4.19887	4.14106	6.02099	4.78697	0.8729
67	ucp2	24.54	24.49	24.5	23.14	23.08	23.1	1.4	1.41	1.4	1.40333	0.00471405		24.9	24.8	24.75	24.48	24.35	24.89	0.42	0.45	-0.14	0.243333	0.271334		0.026253	*	0.98	0.96	1.54	1.16	0.268825		1.97247	1.94531	2.90795	2.27524	0.447527
68	hsd3b1	39.46	39.86	40.56	23.3	23.26	23.27	16.16	16.6	17.29	16.6833	0.465069		38.18	37.33	39.3	21.19	21.06	21.14	16.99	16.27	18.16	17.14	0.778845		0.515823		-0.83	0.33	-0.87	-0.456667	0.556497		0.562529	1.25701	0.547147	0.788896	0.331068
69	hsd11b3a	29.3	29.34	29.8	23.3	23.26	23.27	6	6.08	6.53	6.20333	0.233286		26.85	26.8	26.92	21.19	21.06	21.14	5.66	5.74	5.78	5.72667	0.0498888		0.095827		0.34	0.34	0.75	0.476667	0.193276		1.26576	1.26576	1.68179	1.40444	0.196121
70	ihcgr	37.06	36.44	38.85	23.3	23.26	23.27	13.76	13.18	15.58	14.1733	1.02246		36.14	37.12	35.84	21.19	21.06	21.14	14.95	16.06	14.7	15.2367	0.591063		0.271875		-1.19	-2.88	0.88	-1.06333	1.53762		0.438303	0.135842	1.84038	0.80484	0.742572
71	fshr	39.72	39.62	38.86	23.3	23.26	23.27	16.42	16.36	15.59	16.1233	0.377918		40.02	39.66	39.86	21.19	21.06	21.14	18.83	18.6	18.72	18.7167	0.0939267		0.007532	**	-2.41	-2.24	-3.13	-2.59333	0.385775		0.188156	0.211686	0.114229	0.171357	0.0415222
72	igf3	36.76	36.61	36.13	24.12	24.17	24.11	12.64	12.44	12.02	12.3667	0.258371		38.23	37.31	35.72	20.13	20.11	20.24	18.1	17.2	15.48	16.9267	1.08693		0.004472	**	-5.46	-4.76	-3.46	-4.56	0.828654		0.0227183	0.036906	0.0908733	0.0501659	0.0293615
73	piwil1	35.24	38.66	37.2	24.12	24.17	24.11	11.12	14.49	13.09	12.9	1.38234		38.82	37.67	36.86	20.13	20.11	20.24	18.69	17.56	16.62	17.6233	0.84626		0.014597	*	-7.57	-3.07	-3.53	-4.72333	2.02164		0.00526263	0.11908	0.0865693	0.0703039	0.0478679
Exposure at 14dpf		100 ng/L
	Gene	Control												Treatment-100ng/L												Control vs Treatment-100ng/L
		Target Gene			Reference Gene (β-actin)			ΔCt						Target Gene			Reference Gene (β-actin)			ΔCt						Independent t test								Fold change
序号		Ct-1	Ct-2	Ct-3	Ct-1	Ct-2	Ct-3	ΔCt-1C	ΔCt-2C	ΔCt-3C	ΔCt-C-A	ΔCt-C-SD		Ct-1	Ct-2	Ct-3	Ct-1	Ct-2	Ct-3	ΔCt-1T	ΔCt-2T	ΔCt-3T	ΔCt-T-A	ΔCt-T-SD		p		‒ΔΔCt-1	‒ΔΔCt-2	‒ΔΔCt-3	‒ΔΔCt-A	‒ΔΔCt-SD		2‒ΔΔCt-1	2‒ΔΔCt-2	2‒ΔΔCt-3	2‒ΔΔCt-A	2‒ΔΔCt-SD
1	mprα	33.11	33.54	33.36	25.99	25.85	25.74	7.12	7.69	7.62	7.47667	0.253815		37.66	38.32	37.55	26.09	26.01	26.08	11.57	12.31	11.47	11.7833	0.374641		0.000176	***	-4.09333	-4.83333	-3.99333	-4.30667	0.374641		0.0585847	0.0350769	0.0627895	0.0521504	0.0121942
2	mprβ	35.39	35.21	36.23	25.99	25.85	25.74	9.4	9.36	10.49	9.75	0.523514		35.79	36.48	36.53	26.09	26.01	26.08	9.7	10.47	10.45	10.2067	0.35836		0.366253		0.05	-0.72	-0.7	-0.456667	0.35836		1.03526	0.607097	0.615572	0.752645	0.199873
3	esr2a	35.87	36.6	35.93	24.18	24.09	24.77	11.69	12.51	11.16	11.7867	0.555358		35.24	34.13	33.99	23.39	23.23	23.32	11.85	10.9	10.67	11.14	0.510751		0.292181		-0.0633333	0.886667	1.11667	0.646667	0.510751		0.95705	1.8489	2.16845	1.65813	0.512619
4	esr2b	37.54	37.95	38.03	23.14	23.11	23.13	14.4	14.84	14.9	14.7133	0.22291		39.82	39.86	38.98	23.81	24.14	23.81	16.01	15.72	15.17	15.6333	0.348361		0.03465	*	-1.29667	-1.00667	-0.456667	-0.92	0.348361		0.407066	0.497695	0.728668	0.544476	0.135397
5	cyp19a1b	34.35	34.06	34.89	21.06	21.04	20.98	13.29	13.02	13.91	13.4067	0.372589		35.76	35.65	36.18	22.93	22.94	22.97	12.83	12.71	13.21	12.9167	0.213125		0.181739		0.576667	0.696667	0.196667	0.49	0.213125		1.4914	1.62076	1.14605	1.4194	0.200374
6	clock1a	35.21	34.33	34.82	25.99	25.85	25.74	9.22	8.48	9.08	8.92667	0.320971		35.8	36.88	35.77	26.09	26.01	26.08	9.71	10.87	9.69	10.09	0.551604		0.061463		-0.783333	-1.94333	-0.763333	-1.16333	0.551604		0.581023	0.260015	0.589134	0.476724	0.153272
7	clock1b	29.65	29.56	29.9	25.99	25.85	25.74	3.66	3.71	4.16	3.84333	0.224846		29.35	29.73	29.3	26.09	26.01	26.08	3.26	3.72	3.22	3.4	0.226863		0.121151		0.583333	0.123333	0.623333	0.443333	0.226863		1.49831	1.08925	1.54043	1.376	0.203488
8	clock2	32.88	33.49	33.08	25.99	25.85	25.74	6.89	7.64	7.34	7.29	0.308221		33.73	33.28	33.42	26.09	26.01	26.08	7.64	7.27	7.34	7.41667	0.160485		0.633389		-0.35	0.02	-0.05	-0.126667	0.160485		0.784584	1.01396	0.965936	0.921493	0.0987747
9	arntl1a	33.03	32.66	32.72	25.99	25.85	25.74	7.04	6.81	6.98	6.94333	0.0974109		32.56	33.08	33.09	26.09	26.01	26.08	6.47	7.07	7.01	6.85	0.269815		0.669323		0.473333	-0.126667	-0.0666667	0.0933333	0.269815		1.38831	0.915945	0.954842	1.08637	0.214098
10	arntl1b	35.12	35.34	35.56	25.99	25.85	25.74	9.13	9.49	9.82	9.48	0.28178		35.87	36.58	36.46	26.09	26.01	26.08	9.78	10.57	10.38	10.2433	0.336683		0.06978		-0.3	-1.09	-0.9	-0.763333	0.336683		0.812252	0.469761	0.535887	0.605967	0.148343
11	arntl2	34.81	34.27	34.07	25.99	25.85	25.74	8.82	8.42	8.33	8.52333	0.212968		34.78	35.88	35.99	26.09	26.01	26.08	8.69	9.87	9.91	9.49	0.565921		0.086597		-0.166667	-1.34667	-1.38667	-0.966667	0.565921		0.890899	0.393199	0.382447	0.555515	0.237193
12	nr1d1	28.66	28.86	28.84	25.99	25.85	25.74	2.67	3.01	3.1	2.92667	0.185173		30.04	29.51	29.79	26.09	26.01	26.08	3.95	3.5	3.71	3.72	0.183848		0.012649	*	-1.02333	-0.573333	-0.783333	-0.793333	0.183848		0.491978	0.672062	0.581023	0.581688	0.0735204
13	nr1d2a	30.25	30.15	29.93	25.99	25.85	25.74	4.26	4.3	4.19	4.25	0.0454606		31.5	31.66	31.51	26.09	26.01	26.08	5.41	5.65	5.43	5.49667	0.10873		0.000116	***	-1.16	-1.4	-1.18	-1.24667	0.10873		0.447513	0.378929	0.441351	0.422598	0.0309806
14	nr1d2b	31.24	31.38	31.27	25.99	25.85	25.74	5.25	5.53	5.53	5.43667	0.131993		32.42	32.55	32.75	26.09	26.01	26.08	6.33	6.54	6.67	6.51333	0.140079		0.001381	**	-0.893333	-1.10333	-1.23333	-1.07667	0.140079		0.538369	0.46544	0.425334	0.476381	0.0467904
15	per1a	32.17	31.93	31.84	25.99	25.85	25.74	6.18	6.08	6.1	6.12	0.0432049		33.33	33.16	33.41	26.09	26.01	26.08	7.24	7.15	7.33	7.24	0.0734847		4.9e-05	***	-1.12	-1.03	-1.21	-1.12	0.0734847		0.460094	0.48971	0.432269	0.460691	0.0234542
16	per1b	25.31	25.43	25.25	23.83	23.86	23.83	1.48	1.57	1.42	1.49	0.0616441		27.31	26.73	26.8	26.11	25.83	26.25	1.2	0.9	0.55	0.883333	0.265623		0.034635	*	0.29	0.59	0.94	0.606667	0.265623		1.22264	1.50525	1.91853	1.54881	0.28576
17	per2	28.74	28.73	28.87	23.83	23.86	23.83	4.91	4.87	5.04	4.94	0.0725718		33.77	34.01	33.65	26.11	25.83	26.25	7.66	8.18	7.4	7.74667	0.324277		0.000281	***	-2.72	-3.24	-2.46	-2.80667	0.324277		0.151774	0.105843	0.181747	0.146455	0.0312149
18	per3	26.83	26.97	27.16	23.83	23.86	23.83	3	3.11	3.33	3.14667	0.137194		29.43	29.71	29.61	26.11	25.83	26.25	3.32	3.88	3.36	3.52	0.255082		0.142399		-0.173333	-0.733333	-0.213333	-0.373333	0.255082		0.886791	0.601513	0.862542	0.783615	0.129146
19	cry1a	27.62	27.68	27.9	23.83	23.86	23.83	3.79	3.82	4.07	3.89333	0.125521		33.09	33.61	32.73	26.11	25.83	26.25	6.98	7.78	6.48	7.08	0.535413		0.001208	**	-3.08667	-3.88667	-2.58667	-3.18667	0.535413		0.117712	0.0676078	0.16647	0.117263	0.0403615
20	cry1b	29.43	28.8	28.79	23.83	23.86	23.83	5.6	4.94	4.96	5.16667	0.306522		34.46	34.66	34.88	26.11	25.83	26.25	8.35	8.83	8.63	8.60333	0.196864		0.000182	***	-3.18333	-3.66333	-3.46333	-3.43667	0.196864		0.110083	0.0789272	0.0906636	0.0932247	0.0128477
21	cry2a	27.87	27.7	27.66	23.83	23.86	23.83	4.04	3.84	3.83	3.90333	0.0967241		30.43	30.65	30.69	26.11	25.83	26.25	4.32	4.82	4.44	4.52667	0.213125		0.019665	*	-0.416667	-0.916667	-0.536667	-0.623333	0.213125		0.749154	0.529732	0.689362	0.656082	0.092618
22	cry2b	31.43	31.79	31.19	23.83	23.86	23.83	7.6	7.93	7.36	7.63	0.233666		36.6	36.02	34.77	26.11	25.83	26.25	10.49	10.19	8.52	9.73333	0.866654		0.029546	*	-2.86	-2.56	-0.89	-2.10333	0.866654		0.137738	0.169576	0.539614	0.282309	0.182406
23	cry3	26.06	26.09	26.8	23.83	23.86	23.83	2.23	2.23	2.97	2.47667	0.348839		27.79	27.71	28.22	26.11	25.83	26.25	1.68	1.88	1.97	1.84333	0.121198		0.072343		0.796667	0.596667	0.506667	0.633333	0.121198		1.73708	1.51222	1.42076	1.55669	0.13291
24	cry4	32.23	32.25	32.25	23.83	23.86	23.83	8.4	8.39	8.42	8.40333	0.0124722		35.57	34.9	34.3	26.11	25.83	26.25	9.46	9.07	8.05	8.86	0.594475		0.390809		-1.05667	-0.666667	0.353333	-0.456667	0.594475		0.480742	0.629961	1.27751	0.79607	0.345836
25	cry5	28.75	29.2	28.58	23.83	23.86	23.83	4.92	5.34	4.75	5.00333	0.24797		31.12	30.8	31.04	26.11	25.83	26.25	5.01	4.97	4.79	4.92333	0.0956847		0.692257		-0.00666667	0.0333333	0.213333	0.08	0.0956847		0.99539	1.02337	1.15936	1.05938	0.0716193
26	pgr	36.82	35.87	36.09	24.18	24.09	24.77	12.64	11.78	11.32	11.9133	0.547073		35.79	35.77	35.6	23.39	23.23	23.32	12.4	12.54	12.28	12.4067	0.106249		0.278815		-0.486667	-0.626667	-0.366667	-0.493333	0.106249		0.713672	0.647671	0.775572	0.712305	0.0522244
27	esr1	34.81	35.17	35.41	24.18	24.09	24.77	10.63	11.08	10.64	10.7833	0.209815		33.94	33.87	34.36	23.39	23.23	23.32	10.55	10.64	11.04	10.7433	0.212968		0.859136		0.233333	0.143333	-0.256667	0.04	0.212968		1.17555	1.10445	0.83702	1.03901	0.145746
28	vtg1	37.28	36.54	36.63	24.18	24.09	24.77	13.1	12.45	11.86	12.47	0.506425		34.61	35.15	34.46	23.39	23.23	23.32	11.22	11.92	11.14	11.4267	0.350365		0.074678		1.25	0.55	1.33	1.04333	0.350365		2.37841	1.46409	2.51403	2.11884	0.466281
29	ar	30.22	30.56	30.33	23.83	23.86	23.83	6.39	6.7	6.5	6.53	0.128323		34.43	34.78	34.15	26.11	25.83	26.25	8.32	8.95	7.9	8.39	0.431509		0.004278	**	-1.79	-2.42	-1.37	-1.86	0.431509		0.289172	0.186856	0.386891	0.28764	0.0816712
30	mr	29.36	29.78	29.29	23.83	23.86	23.83	5.53	5.92	5.46	5.63667	0.202375		32.29	32.48	32.96	26.11	25.83	26.25	6.18	6.65	6.71	6.51333	0.236972		0.016422	*	-0.543333	-1.01333	-1.07333	-0.876667	0.236972		0.686184	0.4954	0.47522	0.552268	0.0950505
31	gr	27.32	27.27	27.18	19.21	18.84	18.62	8.11	8.43	8.56	8.36667	0.189091		30.62	30.56	30.53	21.86	21.63	21.85	8.76	8.93	8.68	8.79	0.104243		0.050193		-0.393333	-0.563333	-0.313333	-0.423333	0.104243		0.761368	0.676737	0.80478	0.747628	0.0531687
32	star	27.29	27.31	27.22	19.21	18.84	18.62	8.08	8.47	8.6	8.38333	0.220958		31.01	30.58	31.32	21.86	21.63	21.85	9.15	8.95	9.47	9.19	0.214165		0.020703	*	-0.766667	-0.566667	-1.08667	-0.806667	0.214165		0.587774	0.675175	0.470848	0.577932	0.0837059
33	cyp11a1	37.33	36.53	37.98	19.21	18.84	18.62	18.12	17.69	19.36	18.39	0.708002		39.91	39.35	37.69	21.86	21.63	21.85	18.05	17.72	15.84	17.2033	0.97339		0.235692		0.34	0.67	2.55	1.18667	0.97339		1.26576	1.59107	5.85634	2.90439	2.09157
34	cyp17a1	33.24	33.24	32.95	19.21	18.84	18.62	14.03	14.4	14.33	14.2533	0.160485		36.23	35.05	35.68	21.86	21.63	21.85	14.37	13.42	13.83	13.8733	0.389044		0.270708		-0.116667	0.833333	0.423333	0.38	0.389044		0.922316	1.7818	1.34102	1.34838	0.35092
35	cyp19a1a	38.67	38.94	38.28	24.18	24.09	24.77	14.49	14.85	13.51	14.2833	0.566235		38.94	38.25	40.02	23.39	23.23	23.32	15.55	15.02	16.7	15.7567	0.701253		0.081877		-1.26667	-0.736667	-2.41667	-1.47333	0.701253		0.415619	0.600124	0.187288	0.401011	0.168856
36	cyp11b	31.97	31.44	32.56	19.21	18.84	18.62	12.76	12.6	13.94	13.1	0.597551		35.55	35.95	34.67	21.86	21.63	21.85	13.69	14.32	12.82	13.61	0.61498		0.44762		-0.59	-1.22	0.28	-0.51	0.61498		0.664343	0.429283	1.21419	0.769274	0.328917
37	hsd3b	33.29	34.88	33.69	19.21	18.84	18.62	14.08	16.04	15.07	15.0633	0.800181		36.59	37.6	37.49	21.86	21.63	21.85	14.73	15.97	15.64	15.4467	0.524362		0.601229		0.333333	-0.906667	-0.576667	-0.383333	0.524362		1.25992	0.533416	0.670511	0.821283	0.315173
38	hsd20b	27.6	27.31	27.52	19.21	18.84	18.62	8.39	8.47	8.9	8.58667	0.223954		31.69	31.15	31.06	21.86	21.63	21.85	9.83	9.52	9.21	9.52	0.253114		0.01746	*	-1.24333	-0.933333	-0.623333	-0.933333	0.253114		0.422396	0.523647	0.649169	0.531737	0.0927566
39	hsd17b3	30.3	30.34	30.15	19.21	18.84	18.62	11.09	11.5	11.53	11.3733	0.200721		33.17	33.08	33.31	21.86	21.63	21.85	11.31	11.45	11.46	11.4067	0.0684755		0.834986		0.0633333	-0.0766667	-0.0866667	-0.0333333	0.0684755		1.04488	0.948246	0.941696	0.978273	0.0471721
40	hsd11b2	28.8	28.96	28.84	19.21	18.84	18.62	9.59	10.12	10.22	9.97667	0.276446		30.24	30.14	30.08	21.86	21.63	21.85	8.38	8.51	8.23	8.37333	0.114407		0.001625	**	1.59667	1.46667	1.74667	1.60333	0.114407		3.02444	2.76383	3.35582	3.04803	0.242257
41	gnrh2	29.84	29.83	29.59	19.21	18.84	18.62	10.63	10.99	10.97	10.8633	0.165193		33.59	32.76	32.92	21.86	21.63	21.85	11.73	11.13	11.07	11.31	0.297993		0.137356		-0.866667	-0.266667	-0.206667	-0.446667	0.297993		0.548412	0.831238	0.866537	0.748729	0.142376
42	gnrh3	29.41	29.39	29.25	19.21	18.84	18.62	10.2	10.55	10.63	10.46	0.186726		32.38	32.43	32.6	21.86	21.63	21.85	10.52	10.8	10.75	10.69	0.121929		0.218446		-0.06	-0.34	-0.29	-0.23	0.121929		0.959264	0.790041	0.817902	0.855736	0.0740839
43	fshb	37.05	36.84	37.08	19.21	18.84	18.62	17.84	18	18.46	18.1	0.262805		39.62	40.02	39.33	21.86	21.63	21.85	17.76	18.39	17.48	17.8767	0.380555		0.532156		0.34	-0.29	0.62	0.223333	0.380555		1.26576	0.817902	1.53688	1.20684	0.296461
44	lhb	35.92	35.58	35.98	19.21	18.84	18.62	16.71	16.74	17.36	16.9367	0.299592		37.66	37.43	37.02	21.86	21.63	21.85	15.8	15.8	15.17	15.59	0.296985		0.010702	*	1.13667	1.13667	1.76667	1.34667	0.296985		2.19872	2.19872	3.40267	2.60004	0.567545
45	crh	29.09	28.96	29	19.21	18.84	18.62	9.88	10.12	10.38	10.1267	0.204179		32.44	32.67	32.93	21.86	21.63	21.85	10.58	11.04	11.08	10.9	0.226863		0.0231	*	-0.453333	-0.913333	-0.953333	-0.773333	0.226863		0.730353	0.530957	0.516438	0.592583	0.0975987
46	pomc	34.23	33.28	33.92	24.18	24.09	24.77	10.05	9.19	9.15	9.46333	0.415157		31.86	32	31.61	23.39	23.23	23.32	8.47	8.77	8.29	8.51	0.19799		0.042762	*	0.993333	0.693333	1.17333	0.953333	0.19799		1.99078	1.61702	2.25532	1.95437	0.261856
47	trh	34.63	34.39	34.61	24.18	24.09	24.77	10.45	10.3	9.84	10.1967	0.259529		34.1	34.4	34.16	23.39	23.23	23.32	10.71	11.17	10.84	10.9067	0.19362		0.036186	*	-0.513333	-0.973333	-0.643333	-0.71	0.19362		0.700602	0.509328	0.640232	0.616721	0.0798374
48	tshb	35.32	34.76	35.09	24.18	24.09	24.77	11.14	10.67	10.32	10.71	0.335956		32.75	32.74	32.66	23.39	23.23	23.32	9.36	9.51	9.34	9.40333	0.0758654		0.005825	**	1.35	1.2	1.37	1.30667	0.0758654		2.54912	2.2974	2.58471	2.47707	0.127879
49	nis	33.95	33.86	33.61	24.18	24.09	24.77	9.77	9.77	8.84	9.46	0.438406		33.19	32.78	33.25	23.39	23.23	23.32	9.8	9.55	9.93	9.76	0.157692		0.414005		-0.34	-0.09	-0.47	-0.3	0.157692		0.790041	0.939523	0.721965	0.817176	0.0908666
50	tg	33.81	33.96	33.62	24.18	24.09	24.77	9.63	9.87	8.85	9.45	0.435431		33.16	32.29	32.24	23.39	23.23	23.32	9.77	9.06	8.92	9.25	0.372111		0.647324		-0.32	0.39	0.53	0.2	0.372111		0.80107	1.31039	1.44393	1.18513	0.27699
51	dio1	30.9	31.17	30.79	24.18	24.09	24.77	6.72	7.08	6.02	6.60667	0.440101		29.7	29.19	29.26	23.39	23.23	23.32	6.31	5.96	5.94	6.07	0.169902		0.182945		0.296667	0.646667	0.666667	0.536667	0.169902		1.2283	1.56555	1.5874	1.46042	0.164372
52	dio2	33.42	33.22	33.02	24.18	24.09	24.77	9.24	9.13	8.25	8.87333	0.443045		31.45	31.83	31.8	23.39	23.23	23.32	8.06	8.6	8.48	8.38	0.231517		0.235303		0.813333	0.273333	0.393333	0.493333	0.231517		1.75727	1.2086	1.31342	1.42643	0.23782
53	thra	30.28	30.3	30.43	24.18	24.09	24.77	6.1	6.21	5.66	5.99	0.237627		28.81	28.5	28.55	23.39	23.23	23.32	5.42	5.27	5.23	5.30667	0.0817856		0.018375	*	0.57	0.72	0.76	0.683333	0.0817856		1.48452	1.64718	1.69349	1.6084	0.08961
54	thrb	32.6	31.62	32.02	24.18	24.09	24.77	8.42	7.53	7.25	7.73333	0.498821		30.3	30.13	29.97	23.39	23.23	23.32	6.91	6.9	6.65	6.82	0.120277		0.065548		0.823333	0.833333	1.08333	0.913333	0.120277		1.76949	1.7818	2.11893	1.89007	0.161903
55	amh	37.97	38.82	38.84	23.14	23.11	23.13	14.83	15.71	15.71	15.4167	0.414836		38.57	38.31	39.04	23.81	24.14	23.81	14.76	14.17	15.23	14.72	0.433667		0.175996		0.656667	1.24667	0.186667	0.696667	0.433667		1.57644	2.37293	1.13813	1.69583	0.511123
56	dmrt1	33.97	33.99	33.28	23.14	23.11	23.13	10.83	10.88	10.15	10.62	0.332966		34.24	34.32	35.17	23.81	24.14	23.81	10.43	10.18	11.36	10.6567	0.507696		0.936042		0.19	0.44	-0.74	-0.0366667	0.507696		1.14076	1.3566	0.598739	1.03204	0.318806
57	sox9a	31.21	31.53	31.51	24.34	24.31	24.37	6.87	7.22	7.14	7.07667	0.149741		33.04	32.35	32.59	25.61	25.67	25.62	7.43	6.68	6.97	7.02667	0.308797		0.846821		-0.353333	0.396667	0.106667	0.05	0.308797		0.782773	1.31646	1.07674	1.05866	0.218252
58	sox9b	30.14	30.56	30.32	24.34	24.31	24.37	5.8	6.25	5.95	6	0.187083		31.7	31.32	31.55	25.61	25.67	25.62	6.09	5.65	5.93	5.89	0.181842		0.583101		-0.09	0.35	0.07	0.11	0.181842		0.939523	1.27456	1.04972	1.08793	0.139423
59	tnfα	38.05	38.1	38.4	24.34	24.31	24.37	13.71	13.79	14.03	13.8433	0.135974		39.06	38.55	39.22	25.61	25.67	25.62	13.45	12.88	13.6	13.31	0.310161		0.089893		0.393333	0.963333	0.243333	0.533333	0.310161		1.31342	1.94981	1.18372	1.48232	0.334779
60	ifn	34.15	34.58	33.73	24.34	24.31	24.37	9.81	10.27	9.36	9.81333	0.371513		35.12	35.75	35.92	25.61	25.67	25.62	9.51	10.08	10.3	9.96333	0.3329		0.692536		0.303333	-0.266667	-0.486667	-0.15	0.3329		1.23399	0.831238	0.713672	0.926301	0.222802
61	il-1β	26.42	26.47	27.02	24.34	24.31	24.37	2.08	2.16	2.65	2.29667	0.25197		27.55	27.06	27.32	25.61	25.67	25.62	1.94	1.39	1.7	1.67667	0.225142		0.060373		0.356667	0.906667	0.596667	0.62	0.225142		1.28046	1.87471	1.51222	1.5558	0.244549
62	il-8	28.42	28.4	28.32	24.34	24.31	24.37	4.08	4.09	3.95	4.04	0.0637704		29.54	29.1	29.31	25.61	25.67	25.62	3.93	3.43	3.69	3.68333	0.204179		0.077827		0.11	0.61	0.35	0.356667	0.204179		1.07923	1.52626	1.27456	1.29335	0.182983
63	cxcl-clc	29.83	29.63	30.05	24.34	24.31	24.37	5.49	5.32	5.68	5.49667	0.147045		31.12	31.05	30.81	25.61	25.67	25.62	5.51	5.38	5.19	5.36	0.131403		0.382535		-0.0133333	0.116667	0.306667	0.136667	0.131403		0.990801	1.08423	1.23685	1.10396	0.101412
64	cc-chemokine	32.45	32.7	32.45	24.34	24.31	24.37	8.11	8.39	8.08	8.19333	0.139603		34.98	35.49	35.58	25.61	25.67	25.62	9.37	9.82	9.96	9.71667	0.251705		0.001704	**	-1.17667	-1.62667	-1.76667	-1.52333	0.251705		0.442372	0.323836	0.293887	0.353365	0.0641143
65	inos	35.83	35.76	36.64	24.34	24.31	24.37	11.49	11.45	12.27	11.7367	0.377477		37.84	38.62	39.45	25.61	25.67	25.62	12.23	12.95	13.83	13.0033	0.654285		0.076697		-0.493333	-1.21333	-2.09333	-1.26667	0.654285		0.710382	0.431271	0.234339	0.458664	0.195307
66	bcl2	28.26	28.15	28.56	24.34	24.31	24.37	3.92	3.84	4.19	3.98333	0.149741		29.38	29.43	29.31	25.61	25.67	25.62	3.77	3.76	3.69	3.74	0.0355903		0.08903		0.213333	0.223333	0.293333	0.243333	0.0355903		1.15936	1.16743	1.22547	1.18409	0.0294459
67	ucp2	26.22	26.1	26.22	24.34	24.31	24.37	1.88	1.79	1.85	1.84	0.0374166		27.15	27.13	27.13	25.61	25.67	25.62	1.54	1.46	1.51	1.50333	0.0329983		0.000673	***	0.3	0.38	0.33	0.336667	0.0329983		1.23114	1.30134	1.25701	1.26317	0.0289864
68	hsd3b1	37.29	36.71	37.93	21.06	21.04	20.98	16.23	15.67	16.95	16.2833	0.523917		37.29	38.3	40.51	22.93	22.94	22.97	14.36	15.36	17.54	15.7533	1.32769		0.627252		1.92333	0.923333	-1.25667	0.53	1.32769		3.79298	1.89649	0.41851	2.036	1.38115
69	hsd11b3a	31.61	32	31.62	23.14	23.11	23.13	8.47	8.89	8.49	8.61667	0.193448		33.08	33.52	32.7	23.81	24.14	23.81	9.27	9.38	8.89	9.18	0.209921		0.049271	*	-0.653333	-0.763333	-0.273333	-0.563333	0.209921		0.63581	0.589134	0.827406	0.684116	0.103097
70	ihcgr	35.98	34.79	34.8	23.14	23.11	23.13	12.84	11.68	11.67	12.0633	0.549201		36.17	36.31	36.79	23.81	24.14	23.81	12.36	12.17	12.98	12.5033	0.345864		0.391983		-0.296667	-0.106667	-0.916667	-0.44	0.345864		0.814131	0.928731	0.529732	0.757531	0.167736
71	fshr	38	37.97	37.27	21.06	21.04	20.98	16.94	16.93	16.29	16.72	0.304083		39.97	39.62	39.81	22.93	22.94	22.97	17.04	16.68	16.84	16.8533	0.147271		0.606542		-0.32	0.04	-0.12	-0.133333	0.147271		0.80107	1.02811	0.920188	0.916457	0.0927278
72	igf3	36.75	35.52	34.83	21.06	21.04	20.98	15.69	14.48	13.85	14.6733	0.763515		37.01	36.32	35.51	22.93	22.94	22.97	14.08	13.38	12.54	13.3333	0.629568		0.128012		0.593333	1.29333	2.13333	1.34	0.629568		1.50873	2.45094	4.3873	2.78232	1.19831
73	piwil1	37.43	38.08	36.16	21.06	21.04	20.98	16.37	17.04	15.18	16.1967	0.76917		37.87	34.64	36.51	22.93	22.94	22.97	14.94	11.7	13.54	13.3933	1.32678		0.061		1.25667	4.49667	2.65667	2.80333	1.32678		2.38943	22.5752	6.30574	10.4235	8.74006
Exposure at 14dpf		10000 ng/L
	Gene	Control												Treatment-10000ng/L												Control vs Treatment-10000ng/L
		Target Gene			Reference Gene (β-actin)			ΔCt						Target Gene			Reference Gene (β-actin)			ΔCt						Independent t test								Fold change
序号		Ct-1	Ct-2	Ct-3	Ct-1	Ct-2	Ct-3	ΔCt-1C	ΔCt-2C	ΔCt-3C	ΔCt-C-A	ΔCt-C-SD		Ct-1	Ct-2	Ct-3	Ct-1	Ct-2	Ct-3	ΔCt-1T	ΔCt-2T	ΔCt-3T	ΔCt-T-A	ΔCt-T-SD		p		‒ΔΔCt-1	‒ΔΔCt-2	‒ΔΔCt-3	‒ΔΔCt-A	‒ΔΔCt-SD		2‒ΔΔCt-1	2‒ΔΔCt-2	2‒ΔΔCt-3	2‒ΔΔCt-A	2‒ΔΔCt-SD
1	mprα	30.68	30.33	30.83	22.95	22.3	22.38	7.73	8.03	8.45	8.07	0.295296		33.47	33.05	32.7	22.9	23.2	22.99	10.57	9.85	9.71	10.0433	0.37677		0.004313	**	-2.5	-1.78	-1.64	-1.97333	0.37677		0.176777	0.291183	0.320856	0.262939	0.0621185
2	mprβ	32.51	33.2	32.6	22.95	22.3	22.38	9.56	10.9	10.22	10.2267	0.547073		33.79	33.57	33.71	22.9	23.2	22.99	10.89	10.37	10.72	10.66	0.216487		0.35641		-0.663333	-0.143333	-0.493333	-0.433333	0.216487		0.631418	0.905425	0.710382	0.749075	0.11516
3	esr2a	34.3	34	33.76	22.95	22.3	22.38	11.35	11.7	11.38	11.4767	0.158395		35.95	35.72	35.16	22.9	23.2	22.99	13.05	12.52	12.17	12.58	0.361755		0.016802	*	-1.57333	-1.04333	-0.693333	-1.10333	0.361755		0.336031	0.485205	0.618423	0.479887	0.115347
4	esr2b	37.51	37.19	37.18	22.95	22.3	22.38	14.56	14.89	14.8	14.75	0.139284		37.39	37.14	38.3	22.9	23.2	22.99	14.49	13.94	15.31	14.58	0.562909		0.69971		0.26	0.81	-0.56	0.17	0.562909		1.19748	1.75321	0.678302	1.20966	0.438914
5	cyp19a1b	35.56	35.45	35.03	23.64	23.75	23.6	11.92	11.7	11.43	11.6833	0.200389		37.86	37.97	37.91	25.32	25.21	25.26	12.54	12.76	12.65	12.65	0.0898146		0.00339	**	-0.856667	-1.07667	-0.966667	-0.966667	0.0898146		0.552227	0.474123	0.511687	0.512679	0.0318935
6	clock1a	31.43	31.27	31.28	22.95	22.3	22.38	8.48	8.97	8.9	8.78333	0.216384		33.17	32.85	33.05	22.9	23.2	22.99	10.27	9.65	10.06	9.99333	0.257466		0.007041	**	-1.48667	-0.866667	-1.27667	-1.21	0.257466		0.356836	0.548412	0.412748	0.439332	0.080438
7	clock1b	26.87	26.81	26.82	22.95	22.3	22.38	3.92	4.51	4.44	4.29	0.263186		27.12	27.13	27.18	22.9	23.2	22.99	4.22	3.93	4.19	4.11333	0.130213		0.442782		0.07	0.36	0.1	0.176667	0.130213		1.04972	1.28343	1.07177	1.13497	0.105358
8	clock2	29.67	29.54	29.75	22.95	22.3	22.38	6.72	7.24	7.37	7.11	0.280832		31.08	31.11	31.07	22.9	23.2	22.99	8.18	7.91	8.08	8.05667	0.111455		0.011413	*	-1.07	-0.8	-0.97	-0.946667	0.111455		0.476319	0.574349	0.510506	0.520391	0.0406265
9	arntl1a	29.52	29.73	29.42	22.95	22.3	22.38	6.57	7.43	7.04	7.01333	0.3516		30.05	30.21	30.17	22.9	23.2	22.99	7.15	7.01	7.18	7.11333	0.074087		0.713969		-0.136667	0.00333333	-0.166667	-0.1	0.074087		0.909618	1.00231	0.890899	0.934277	0.0487122
10	arntl1b	32.55	32.88	32.96	22.95	22.3	22.38	9.6	10.58	10.58	10.2533	0.461976		34.33	34.17	34.85	22.9	23.2	22.99	11.43	10.97	11.86	11.42	0.36341		0.048464	*	-1.17667	-0.716667	-1.60667	-1.16667	0.36341		0.442372	0.608502	0.328356	0.459743	0.115027
11	arntl2	32.24	31.21	31.51	22.95	22.3	22.38	9.29	8.91	9.13	9.11	0.155778		34.09	33.56	34.03	22.9	23.2	22.99	11.19	10.36	11.04	10.8633	0.36114		0.003236	**	-2.08	-1.25	-1.93	-1.75333	0.36114		0.236514	0.420448	0.262429	0.306464	0.0812904
12	nr1d1	25.07	24.71	24.82	22.95	22.3	22.38	2.12	2.41	2.44	2.32333	0.144299		27.06	26.74	26.74	22.9	23.2	22.99	4.16	3.54	3.75	3.81667	0.257466		0.002019	**	-1.83667	-1.21667	-1.42667	-1.49333	0.257466		0.279968	0.430276	0.371989	0.360744	0.0618759
13	nr1d2a	27.41	26.96	26.9	22.95	22.3	22.38	4.46	4.66	4.52	4.54667	0.0837987		28.46	28.61	28.52	22.9	23.2	22.99	5.56	5.41	5.53	5.5	0.0648074		0.00022	***	-1.01333	-0.863333	-0.983333	-0.953333	0.0648074		0.4954	0.549681	0.50581	0.516964	0.0235217
14	nr1d2b	28.78	28.01	28.04	22.95	22.3	22.38	5.83	5.71	5.66	5.73333	0.0713364		30.13	30.11	30.07	22.9	23.2	22.99	7.23	6.91	7.08	7.07333	0.130724		0.00022	***	-1.49667	-1.17667	-1.34667	-1.34	0.130724		0.354371	0.442372	0.393199	0.396648	0.036009
15	per1a	28.17	28.11	28.18	22.95	22.3	22.38	5.22	5.81	5.8	5.61	0.275802		30.64	30.55	30.57	22.9	23.2	22.99	7.74	7.35	7.58	7.55667	0.160069		0.00099	***	-2.13	-1.74	-1.97	-1.94667	0.160069		0.228458	0.29937	0.255253	0.261027	0.0292361
16	per1b	25.07	25.06	25.04	23.78	24.19	23.75	1.29	0.87	1.29	1.15	0.19799		25.6	25.58	26.07	24.45	24.45	24.39	1.15	1.13	1.68	1.32	0.254689		0.497523		-3.55271e-15	0.02	-0.53	-0.17	0.254689		1	1.01396	0.692555	0.902171	0.148331
17	per2	30.9	31.1	30.75	23.78	24.19	23.75	7.12	6.91	7	7.01	0.0860233		32.01	31.75	31.09	24.45	24.45	24.39	7.56	7.3	6.7	7.18667	0.360123		0.536802		-0.55	-0.29	0.31	-0.176667	0.360123		0.68302	0.817902	1.23971	0.913543	0.237116
18	per3	27.24	27.29	27.71	23.78	24.19	23.75	3.46	3.1	3.96	3.50667	0.352641		28.24	28.22	28.32	24.45	24.45	24.39	3.79	3.77	3.93	3.83	0.0711805		0.2726		-0.283333	-0.263333	-0.423333	-0.323333	0.0711805		0.82169	0.833161	0.7457	0.800184	0.0388095
19	cry1a	29.55	29.8	29.74	23.78	24.19	23.75	5.77	5.61	5.99	5.79	0.155778		30.39	30.64	30.82	24.45	24.45	24.39	5.94	6.19	6.43	6.18667	0.200056		0.091377		-0.15	-0.4	-0.64	-0.396667	0.200056		0.90125	0.757858	0.641713	0.766941	0.10615
20	cry1b	31.2	31.14	30.81	23.78	24.19	23.75	7.42	6.95	7.06	7.14333	0.200721		31.61	31.83	32.09	24.45	24.45	24.39	7.16	7.38	7.7	7.41333	0.221711		0.270777		-0.0166667	-0.236667	-0.556667	-0.27	0.221711		0.988514	0.848704	0.679871	0.83903	0.126188
21	cry2a	27.99	28.15	28.68	23.78	24.19	23.75	4.21	3.96	4.93	4.36667	0.411204		28.85	29.43	28.88	24.45	24.45	24.39	4.4	4.98	4.49	4.62333	0.254864		0.494797		-0.0333333	-0.613333	-0.123333	-0.256667	0.254864		0.97716	0.653685	0.918064	0.849636	0.140643
22	cry2b	32.67	32.53	32.93	23.78	24.19	23.75	8.89	8.34	9.18	8.80333	0.348361		33.31	32.97	33.45	24.45	24.45	24.39	8.86	8.52	9.06	8.81333	0.22291		0.97436		-0.0566667	0.283333	-0.256667	-0.01	0.22291		0.961483	1.217	0.83702	1.00517	0.158173
23	cry3	25.74	25.54	25.7	23.78	24.19	23.75	1.96	1.35	1.95	1.75333	0.285229		27.16	27.02	26.62	24.45	24.45	24.39	2.71	2.57	2.23	2.50333	0.20155		0.038518	*	-0.956667	-0.816667	-0.476667	-0.75	0.20155		0.515246	0.567752	0.718636	0.600545	0.0862106
24	cry4	33.05	32.24	32.48	23.78	24.19	23.75	9.27	8.05	8.73	8.68333	0.499155		33.27	33.19	33.14	24.45	24.45	24.39	8.82	8.74	8.75	8.77	0.0355903		0.818567		-0.136667	-0.0566667	-0.0666667	-0.0866667	0.0355903		0.909618	0.961483	0.954842	0.941981	0.0230439
25	cry5	29.78	29.29	29.04	23.78	24.19	23.75	6	5.1	5.29	5.46333	0.387327		29.99	29.4	29.47	24.45	24.45	24.39	5.54	4.95	5.08	5.19	0.253114		0.450471		-0.0766667	0.513333	0.383333	0.273333	0.253114		0.948246	1.42734	1.30435	1.22665	0.203162
26	pgr	35.44	35.83	35.16	23.78	24.19	23.75	11.66	11.64	11.41	11.57	0.113431		35.61	35.28	35.54	24.45	24.45	24.39	11.16	10.83	11.15	11.0467	0.153261		0.017817	*	0.41	0.74	0.42	0.523333	0.153261		1.32869	1.67018	1.33793	1.4456	0.158846
27	esr1	35.98	35.67	35.09	23.78	24.19	23.75	12.2	11.48	11.34	11.6733	0.37677		37.14	36.51	38.44	24.45	24.45	24.39	12.69	12.06	14.05	12.9333	0.830435		0.122388		-1.01667	-0.386667	-2.37667	-1.26	0.830435		0.494257	0.764895	0.192554	0.483902	0.233772
28	vtg1	33.94	34.27	33.9	22.4	22.46	22.33	11.54	11.81	11.57	11.64	0.12083		36.68	36.67	36.1	22.94	22.66	22.95	13.74	14.01	13.15	13.6333	0.359104		0.001743	**	-2.1	-2.37	-1.51	-1.99333	0.359104		0.233258	0.193446	0.351111	0.259272	0.0669434
29	ar	30.61	30.68	30.51	23.78	24.19	23.75	6.83	6.49	6.76	6.69333	0.146591		31.53	32.17	32.11	24.45	24.45	24.39	7.08	7.72	7.72	7.50667	0.301699		0.026556	*	-0.386667	-1.02667	-1.02667	-0.813333	0.301699		0.764895	0.490843	0.490843	0.582194	0.129189
30	mr	29.97	29.89	29.76	23.78	24.19	23.75	6.19	5.7	6.01	5.96667	0.202375		31.74	31.54	31.66	24.45	24.45	24.39	7.29	7.09	7.27	7.21667	0.0899383		0.001335	**	-1.32333	-1.12333	-1.30333	-1.25	0.0899383		0.399611	0.459032	0.405189	0.421277	0.0267937
31	gr	31.5	31.49	31.38	23.24	22.73	22.77	8.26	8.76	8.61	8.54333	0.209497		32.31	32.55	32.58	24.11	24.01	24.06	8.2	8.54	8.52	8.42	0.155778		0.540641		0.343333	0.00333333	0.0233333	0.123333	0.155778		1.26868	1.00231	1.0163	1.09577	0.122404
32	star	31.92	31.98	31.54	23.24	22.73	22.77	8.68	9.25	8.77	8.9	0.2502		33.95	33.08	33.73	24.11	24.01	24.06	9.84	9.07	9.67	9.52667	0.330286		0.099216		-0.94	-0.17	-0.77	-0.626667	0.330286		0.521233	0.888843	0.586417	0.665498	0.160155
33	cyp11a1	36.49	36.2	37.18	22.4	22.46	22.33	14.09	13.74	14.85	14.2267	0.463345		36.86	37.57	37.37	22.94	22.66	22.95	13.92	14.91	14.42	14.4167	0.404173		0.684657		0.306667	-0.683333	-0.193333	-0.19	0.404173		1.23685	0.622725	0.874583	0.911385	0.252061
34	cyp17a1	35.77	35.08	35.13	23.24	22.73	22.77	12.53	12.35	12.36	12.4133	0.0825967		37.22	36.25	35.94	24.11	24.01	24.06	13.11	12.24	11.88	12.41	0.516333		0.993239		-0.696667	0.173333	0.533333	0.00333333	0.516333		0.616996	1.12766	1.44727	1.06398	0.341936
35	cyp19a1a	37.68	37.72	37.76	22.4	22.46	22.33	15.28	15.26	15.43	15.3233	0.0758654		38.67	38.71	38.8	22.94	22.66	22.95	15.73	16.05	15.85	15.8767	0.131993		0.006791	**	-0.406667	-0.726667	-0.526667	-0.553333	0.131993		0.754364	0.604299	0.694157	0.684273	0.0616614
36	cyp11b	36.75	36.17	37.62	23.24	22.73	22.77	13.51	13.44	14.85	13.9333	0.648811		37.72	36.27	35.94	24.11	24.01	24.06	13.61	12.26	11.88	12.5833	0.742354		0.124886		0.323333	1.67333	2.05333	1.35	0.742354		1.25122	3.18951	4.15064	2.86379	1.20588
37	hsd3b	36.1	35.11	36.18	23.64	23.75	23.6	12.46	11.36	12.58	12.1333	0.549019		37.34	38	37.51	25.32	25.21	25.26	12.02	12.79	12.25	12.3533	0.322731		0.650741		0.113333	-0.656667	-0.116667	-0.22	0.322731		1.08172	0.634342	0.922316	0.879461	0.18514
38	hsd20b	30.93	30.17	31.4	23.24	22.73	22.77	7.69	7.44	8.63	7.92	0.512315		32.67	31.99	32.28	24.11	24.01	24.06	8.56	7.98	8.22	8.25333	0.237954		0.450928		-0.64	-0.06	-0.3	-0.333333	0.237954		0.641713	0.959264	0.812252	0.80441	0.129758
39	hsd17b3	32.1	32.16	32.46	23.24	22.73	22.77	8.86	9.43	9.69	9.32667	0.346635		32.79	32.57	32.91	24.11	24.01	24.06	8.68	8.56	8.85	8.69667	0.118977		0.071897		0.646667	0.766667	0.476667	0.63	0.118977		1.56555	1.70133	1.39152	1.5528	0.1268
40	hsd11b2	31.28	31.57	31.42	23.24	22.73	22.77	8.04	8.84	8.65	8.51	0.341272		32.65	32.26	32.6	24.11	24.01	24.06	8.54	8.25	8.54	8.44333	0.136707		0.810251		-0.03	0.26	-0.03	0.0666667	0.136707		0.97942	1.19748	0.97942	1.05211	0.102794
41	gnrh2	33.72	32.72	33.18	23.24	22.73	22.77	10.48	9.99	10.41	10.2933	0.216384		33.81	33.55	34.05	24.11	24.01	24.06	9.7	9.54	9.99	9.74333	0.18625		0.052747		0.593333	0.753333	0.303333	0.55	0.18625		1.50873	1.68568	1.23399	1.47613	0.185837
42	gnrh3	32.95	32.81	32.59	23.24	22.73	22.77	9.71	10.08	9.82	9.87	0.155134		34.57	33.73	34.92	24.11	24.01	24.06	10.46	9.72	10.86	10.3467	0.472252		0.246557		-0.59	0.15	-0.99	-0.476667	0.472252		0.664343	1.10957	0.503478	0.75913	0.256353
43	fshb	36.08	36.64	36.32	21.47	21.88	21.48	14.61	14.76	14.84	14.7367	0.0953357		36.2	37.52	37.21	22.26	22.18	22.17	13.94	15.34	15.04	14.7733	0.601849		0.939606		0.796667	-0.603333	-0.303333	-0.0366667	0.601849		1.73708	0.658231	0.810378	1.06856	0.476778
44	lhb	34.96	38.78	35.2	21.47	21.88	21.48	13.49	16.9	13.72	14.7033	1.55611		37.16	36.29	39.27	22.26	22.18	22.17	14.9	14.11	17.1	15.37	1.2651		0.662758		-0.196667	0.593333	-2.39667	-0.666667	1.2651		0.872564	1.50873	0.189903	0.857065	0.53852
45	crh	33.8	35.05	33.45	23.24	22.73	22.77	10.56	12.32	10.68	11.1867	0.802884		34.46	34.71	33.56	24.11	24.01	24.06	10.35	10.7	9.5	10.1833	0.503874		0.208758		0.836667	0.486667	1.68667	1.00333	0.503874		1.78592	1.4012	3.21912	2.13541	0.782226
46	pomc	33.31	34.27	33.55	23.64	23.75	23.6	9.67	10.52	9.95	10.0467	0.353679		34.63	34.22	35.18	25.32	25.21	25.26	9.31	9.01	9.92	9.41333	0.378623		0.158924		0.736667	1.03667	0.126667	0.633333	0.378623		1.66632	2.05148	1.09177	1.60319	0.394336
47	trh	34.39	34	34.24	23.64	23.75	23.6	10.75	10.25	10.64	10.5467	0.214528		36.13	35.18	35.7	25.32	25.21	25.26	10.81	9.97	10.44	10.4067	0.343738		0.650678		-0.263333	0.576667	0.106667	0.14	0.343738		0.833161	1.4914	1.07674	1.13377	0.271734
48	tshb	34.92	34.67	34.49	23.64	23.75	23.6	11.28	10.92	10.89	11.03	0.1772		35.8	35.5	37.13	25.32	25.21	25.26	10.48	10.29	11.87	10.88	0.70432		0.784745		0.55	0.74	-0.84	0.15	0.70432		1.46409	1.67018	0.558644	1.23097	0.482793
49	nis	33.96	33.84	34.52	23.64	23.75	23.6	10.32	10.09	10.92	10.4433	0.349889		36.38	36.82	37.75	25.32	25.21	25.26	11.06	11.61	12.49	11.72	0.588954		0.057849		-0.616667	-1.16667	-2.04667	-1.27667	0.588954		0.652176	0.445449	0.242043	0.446556	0.167438
50	tg	33.86	33.44	33.2	23.64	23.75	23.6	10.22	9.69	9.6	9.83667	0.273537		34.66	35.23	35.13	25.32	25.21	25.26	9.34	10.02	9.87	9.74333	0.2917		0.757907		0.496667	-0.183333	-0.0333333	0.0933333	0.2917		1.41095	0.880666	0.97716	1.08959	0.230624
51	dio1	31.07	31.12	30.8	23.64	23.75	23.6	7.43	7.37	7.2	7.33333	0.0974109		33.16	32.61	32.59	25.32	25.21	25.26	7.84	7.4	7.33	7.52333	0.225733		0.335834		-0.506667	-0.0666667	0.00333333	-0.19	0.225733		0.703847	0.954842	1.00231	0.887001	0.130951
52	dio2	32.27	32.5	32.04	23.64	23.75	23.6	8.63	8.75	8.44	8.60667	0.127628		34.46	34.91	35.42	25.32	25.21	25.26	9.14	9.7	10.16	9.66667	0.41708		0.026369	*	-0.533333	-1.09333	-1.55333	-1.06	0.41708		0.690956	0.468677	0.340722	0.500119	0.144701
53	thra	30.16	29.86	29.73	23.64	23.75	23.6	6.52	6.11	6.13	6.25333	0.188739		32.03	31.44	32.01	25.32	25.21	25.26	6.71	6.23	6.75	6.56333	0.236267		0.220724		-0.456667	0.0233333	-0.496667	-0.31	0.236267		0.728668	1.0163	0.708742	0.817905	0.140526
54	thrb	31.64	31.73	31.63	23.64	23.75	23.6	8	7.98	8.03	8.00333	0.020548		33.22	33.82	33.48	25.32	25.21	25.26	7.9	8.61	8.22	8.24333	0.290325		0.308341		0.103333	-0.606667	-0.216667	-0.24	0.290325		1.07425	0.656712	0.860551	0.863839	0.170476
55	amh	36.6	36.7	36.9	23.36	23.31	23.35	13.24	13.39	13.55	13.3933	0.126579		37.56	36.91	36.55	22.83	22.97	22.84	14.73	13.94	13.71	14.1267	0.436832		0.084757		-1.33667	-0.546667	-0.316667	-0.733333	0.436832		0.395934	0.6846	0.802923	0.627819	0.170935
56	dmrt1	34.38	33.43	34.56	23.36	23.31	23.35	11.02	10.12	11.21	10.7833	0.475418		33.43	33.83	33.7	22.83	22.97	22.84	10.6	10.86	10.86	10.7733	0.122565		0.9784		0.183333	-0.0766667	-0.0766667	0.01	0.122565		1.1355	0.948246	0.948246	1.01067	0.0882745
57	sox9a	29.2	29.07	28.99	23.36	23.31	23.35	5.84	5.76	5.64	5.74667	0.0821922		29.16	29.12	28.87	22.83	22.97	22.84	6.33	6.15	6.03	6.17	0.123288		0.015599	*	-0.583333	-0.403333	-0.283333	-0.423333	0.123288		0.66742	0.756109	0.82169	0.748407	0.0632157
58	sox9b	29.34	29.2	29.19	23.36	23.31	23.35	5.98	5.89	5.84	5.90333	0.0579272		29.05	29.09	29.07	22.83	22.97	22.84	6.22	6.12	6.23	6.19	0.0496655		0.006034	**	-0.316667	-0.216667	-0.326667	-0.286667	0.0496655		0.802923	0.860551	0.797377	0.820284	0.0285635
59	tnfα	37.52	38.8	37.68	23.36	23.31	23.35	14.16	15.49	14.33	14.66	0.590988		37.43	36.99	37.28	22.83	22.97	22.84	14.6	14.02	14.44	14.3533	0.244586		0.534927		0.06	0.64	0.22	0.306667	0.244586		1.04247	1.55833	1.16473	1.25518	0.220096
60	ifn	32.25	32.59	32.79	23.36	23.31	23.35	8.89	9.28	9.44	9.20333	0.230988		32.71	32.3	32.54	22.83	22.97	22.84	9.88	9.33	9.7	9.63667	0.228959		0.132627		-0.676667	-0.126667	-0.496667	-0.433333	0.228959		0.625609	0.915945	0.708742	0.750099	0.122083
61	il-1β	28.37	28.12	28.27	23.36	23.31	23.35	5.01	4.81	4.92	4.91333	0.0817856		26.46	26.4	26.48	22.83	22.97	22.84	3.63	3.43	3.64	3.56667	0.0967241		0.000114	***	1.28333	1.48333	1.27333	1.34667	0.0967241		2.43401	2.79594	2.41719	2.54905	0.174714
62	il-8	28.84	28.9	28.84	23.36	23.31	23.35	5.48	5.59	5.49	5.52	0.0496655		29.14	29.1	29.17	22.83	22.97	22.84	6.31	6.13	6.33	6.25667	0.0899383		0.000533	***	-0.79	-0.61	-0.81	-0.736667	0.0899383		0.578344	0.655197	0.570382	0.601308	0.0382438
63	cxcl-clc	28.91	28.77	28.97	23.36	23.31	23.35	5.55	5.46	5.62	5.54333	0.0654896		27.81	27.85	27.77	22.83	22.97	22.84	4.98	4.88	4.93	4.93	0.0408248		0.000357	***	0.563333	0.663333	0.613333	0.613333	0.0408248		1.47768	1.58374	1.52979	1.5304	0.0433002
64	cc-chemokine	30.08	29.85	30.14	23.36	23.31	23.35	6.72	6.54	6.79	6.68333	0.105304		30.4	30.09	30.05	22.83	22.97	22.84	7.57	7.12	7.21	7.3	0.194422		0.0169	*	-0.886667	-0.436667	-0.526667	-0.616667	0.194422		0.540862	0.73884	0.694157	0.657953	0.0847813
65	inos	33.44	33.8	33.62	23.36	23.31	23.35	10.08	10.49	10.27	10.28	0.167531		33.86	33.9	33.53	22.83	22.97	22.84	11.03	10.93	10.69	10.8833	0.142673		0.017879	*	-0.75	-0.65	-0.41	-0.603333	0.142673		0.594604	0.63728	0.752623	0.661502	0.0667463
66	bcl2	27.14	27.15	27.14	23.36	23.31	23.35	3.78	3.84	3.79	3.80333	0.0262467		26.96	27.03	26.95	22.83	22.97	22.84	4.13	4.06	4.11	4.1	0.0294392		0.000442	***	-0.326667	-0.256667	-0.306667	-0.296667	0.0294392		0.797377	0.83702	0.808508	0.814301	0.0166946
67	ucp2	23.87	23.87	23.92	23.36	23.31	23.35	0.51	0.56	0.57	0.546667	0.0262467		23.94	23.91	23.83	22.83	22.97	22.84	1.11	0.94	0.99	1.01333	0.0713364		0.000969	***	-0.563333	-0.393333	-0.443333	-0.466667	0.0713364		0.676737	0.761368	0.735433	0.724513	0.0354031
68	hsd3b1	38.56	37.97	38.32	21.47	21.88	21.48	17.09	16.09	16.84	16.6733	0.424918		38.13	37.21	37.28	22.26	22.18	22.17	15.87	15.03	15.11	15.3367	0.378535		0.02933	*	0.803333	1.64333	1.56333	1.33667	0.378535		1.74513	3.12387	2.95536	2.60812	0.614091
69	hsd11b3a	30.88	30.98	30.7	22.4	22.46	22.33	8.48	8.52	8.37	8.45667	0.063421		30.84	31.26	31.08	22.94	22.66	22.95	7.9	8.6	8.13	8.21	0.291319		0.306941		0.556667	-0.143333	0.326667	0.246667	0.291319		1.47087	0.905425	1.25411	1.21013	0.232926
70	ihcgr	33.78	34.07	33.7	22.4	22.46	22.33	11.38	11.61	11.37	11.4533	0.110855		34.12	34.63	34.61	22.94	22.66	22.95	11.18	11.97	11.66	11.6033	0.324996		0.570161		0.273333	-0.516667	-0.206667	-0.15	0.324996		1.2086	0.698985	0.866537	0.924706	0.212075
71	fshr	38.23	38.3	37.79	22.4	22.46	22.33	15.83	15.84	15.46	15.71	0.176824		39.52	39.38	39.84	22.94	22.66	22.95	16.58	16.72	16.89	16.73	0.126754		0.002685	**	-0.87	-1.01	-1.18	-1.02	0.126754		0.547147	0.496546	0.441351	0.495015	0.0432043
72	igf3	34.83	34.06	34.05	21.47	21.88	21.48	13.36	12.18	12.57	12.7033	0.490872		36.37	35.81	35.78	22.26	22.18	22.17	14.11	13.63	13.61	13.7833	0.231132		0.048069	*	-1.40667	-0.926667	-0.906667	-1.08	0.231132		0.377182	0.526072	0.533416	0.47889	0.0719809
73	piwil1	35.62	37.75	33.94	21.47	21.88	21.48	14.15	15.87	12.46	14.16	1.39214		38.06	37.45	37.31	22.26	22.18	22.17	15.8	15.27	15.14	15.4033	0.285463		0.283647		-1.64	-1.11	-0.98	-1.24333	0.285463		0.320856	0.463294	0.50698	0.430377	0.0794696

## Sheet: t-test
SPSS
		mpra	mprb	esr2a	esr2b	cyp19a1b	clock1a	clock1b	clock2	arntl1a	arntl1b	arntl2	nr1d1	nr1d2a	nr1d2b	per1a	per1b	per2	per3	cry1a	cry1b	cry2a	cry2b	cry3	cry4	cry5	pgr	esr1	vtg1	ar	mr	gr	star	cyp11a1	cyp17a1	cyp19a1a	cyp11b	hsd3b	hsd20b	hsd17b3	hsd11b2	gnrh2	gnrh3	fshb	lhb	crh	pomc	trh	tshb
2 dpf 100 ng/L	1	8.48	10.27	10.27	9.07	10.91	7.26	9.02	8.76	7.32	10.31	12.1	13.92	14.99	11.33	11.16	6.94	7.84	13.94	7.97	12.14	13.46	9.52	5.67	11.05	7.37	10.64	9.58	14.6	9.66	10.7	6.94	7.84	13.94	7.97	16.05	13.46	9.52	5.67	11.05	7.37	10.64	9.58	18.22	17.59	10.7	12.21	14.68	11.45
	1	8.52	10.21	9.46	8.96	10.76	7.29	9.16	8.48	7.75	10.19	12.26	13.86	13.92	11.12	11.03	7.05	8.4	14.46	8.38	11.56	12.91	9.92	5.79	11.72	7.42	10.09	9.06	13.43	9.83	10.86	7.05	8.4	14.46	8.38	16.53	12.91	9.92	5.79	11.72	7.42	10.09	9.06	17.34	18.8	10.86	11.71	14.96	11.2
	1	8.47	11.02	9.95	8.86	10.79	7.26	8.92	9.36	7.27	10.2	12.61	14.01	13.9	11.39	10.95	7.3	8.24	14.72	8.48	11.66	13.31	10	6.04	11.57	7.42	10.91	9.24	13.52	9.67	11.59	7.3	8.24	14.72	8.48	17	13.31	10	6.04	11.57	7.42	10.91	9.24	18.44	16.29	11.59	11.54	14.47	10.89
	2	7.43	9.18	8.68	8.93	11.33	6.55	8.96	7.6	6.62	9.73	12.84	16.27	13.77	10.31	10.86	7.1	7.71	12.42	8.87	11.58	10.12	8.68	5.76	11.22	6.84	9.65	8.3	13.09	10.87	10.47	7.1	7.71	12.42	8.87	15.84	10.12	8.68	5.76	11.22	6.84	9.65	8.3	16.53	16.28	10.47	11.15	14.46	10.86
	2	8	9.85	9.51	9.82	11.43	7.08	10.26	8.28	7.01	9.29	12.07	16.6	15.2	11.33	12.33	7.68	8.47	14.98	9.07	11.09	10.63	9.33	6.31	12.22	7.85	9.64	8.68	14.39	11.42	10.85	7.68	8.47	14.98	9.07	13.58	10.63	9.33	6.31	12.22	7.85	9.64	8.68	16.3	15.67	10.85	11.54	14.82	11.02
	2	7.89	9.87	9.13	9.61	11.36	6.78	9.6	8.03	6.76	9.54	12.42	16.56	13.46	10.96	10.89	7.51	8.43	13.21	8.69	11.19	10.76	8.86	6.07	11.73	7.42	10	9.32	15.16	11.27	10.32	7.51	8.43	13.21	8.69	14.83	10.76	8.86	6.07	11.73	7.42	10	9.32	15.01	14.76	10.32	11.63	15.29	10.38
2 dpf 10000 ng/L	1	10.59	10.55	13.96	13.6	13.89	10.72	8.32	11.96	7.55	10.72	7.67	12.32	10.26	9.64	16.42	7.52	10.33	8.81	10.48	11.3	6.35	10.74	8.73	7.74	9.25	12.19	16.17	14.99	10.58	10.16	7.55	8.75	14.13	8.12	18.64	13.12	10.06	7.2	11.33	8.06	9.74	9.2	18.49	17.32	11.91	12.41	14.25	11.48
	1	10.36	10.69	14.63	12.84	13.93	10.89	7.97	12.09	7.13	10.46	8.05	12.17	9.58	8.99	17.13	7.9	10.43	8.76	10.46	11.41	6.52	9.65	8.65	7.97	9.87	11.96	13.71	14.55	10.87	10.64	7.95	9.41	15.07	8.62	18.25	13.29	10.32	6.86	12.29	8.37	10.29	9.37	17.63	18.35	12.37	13.07	14.38	11.74
	1	10.68	10.1	14.45	13.19	15.13	10.41	8.14	11.99	7.25	10.88	7.71	11.75	9.55	9.23	16.73	7.34	10.51	8.8	9.69	12.07	6.34	9.83	9.11	7.61	9	12.27	15.43	14.23	11.1	10.37	7.94	9.07	15.28	8.52	19.49	13.72	10.58	7.19	12.04	8.38	10.67	9.22	16.95	19.19	12.52	12.72	14.35	11.93
	2	11.83	11.84	14.3	13.27	14.15	13.19	8.64	13.45	7.63	10.56	9.36	14.02	11.78	10.59	16.2	6.8	10.18	9.13	10.4	11.47	5.78	9.43	7.77	6.84	8.41	11.71	15.59	13.26	10.07	10	7.95	8.92	16.34	9.64	17.65	13.69	10.19	6.39	11.96	8.04	10.04	8.58	17.36	17.49	10.39	12.16	14.92	11.7
	2	12.4	11.42	16.28	13.8	13.57	13.04	8.92	13.16	7.64	9.86	9.04	14.32	12.29	10.83	16.72	7.25	10.46	9.85	11.2	12.46	6.37	9.9	7.75	7.07	8.88	12.43	14.31	13.7	10.64	11.15	8.22	9.22	16.87	9.69	15.26	13.78	8.02	6.09	11.78	8.15	10.56	9.04	18.44	18.34	11.48	11.97	14.17	12.15
	2	11.27	11.43	16.04	13.48	14.26	11.93	8.71	12.61	7.53	10.71	9.36	13.74	12.22	10.97	16.09	7.27	10.32	8.96	10.96	11.84	5.98	10.12	7.89	7.06	9.15	12.48	14.44	14.14	10.62	11.21	7.8	8.89	16.1	9.61	16.8	13.66	10.07	6.68	11.71	8.18	10.22	8.32	16.54	18.44	10.97	12.08	14.89	11.45
7 dpf 100 ng/L	1	10.64	9.87	15.44	15.63	12.28	10.52	5.03	8.92	6.66	10.85	10.97	4.91	7.06	7.46	9.64	3.84	9.48	4.54	5.11	6.63	4.57	10.83	5.14	7.52	5.39	13.84	12.09	12.9	7.35	6.62	8.46	9.04	12.64	9.53	12.9	12.55	13.18	6.73	10.57	9.64	11.68	9.74	16.15	13.02	10.76	12.62	12.38	11.11
	1	10.03	9.43	14.21	14.95	11.19	10.75	5.17	9.31	6.84	11.1	11.14	4.97	7.54	7.72	10.84	3.67	10.12	4.62	5.12	6.65	4.49	11.63	5.19	7.51	5.18	12.97	11.19	11.52	7.11	6.67	8.77	8.98	12.73	9.26	12.01	12.6	12.85	6.81	10.77	9.51	12.25	9.73	17.81	17.54	10.62	12.01	12.68	11.82
	1	10.43	9.81	14.71	14.64	13.33	10.92	5.14	9.41	6.63	11.05	10.77	4.95	7.49	8.32	10.06	3.71	9.99	4.64	5.19	6.67	4.48	11.11	5.25	7.42	5.83	13.04	11.98	11.4	6.97	6.54	8.93	8.95	11.05	9.23	10.86	11.7	13.45	7	10.42	9.57	12.29	9.73	17.71	14.6	10.29	12.62	12.58	11.55
	2	9.4	9.08	13.83	14.82	11.62	10.21	4.98	8.63	6.74	10.19	10.55	3.66	5.79	7.56	8.77	2.81	10.15	5.35	6.96	9.73	5.12	11.07	4.41	8.12	4.23	10.98	11.96	13.18	7.59	7.9	9.68	8.91	12.79	11.64	11.6	13.92	12.84	6.93	10.57	9.56	12.6	9.14	15.91	17.74	10.63	13.28	11.12	10.94
	2	9.98	10.39	13.28	15.18	11.58	9.92	5.17	8.76	6.66	9.92	10.19	3.84	6	6.68	8.76	2.82	10.36	5.36	7.68	9.13	5.14	10.04	4.25	8.2	4.18	12.61	11.61	12.95	7.83	8.11	8.98	8.55	13.03	11.62	10.93	13.63	13.66	6.73	10.87	9.87	12.54	9.2	16	15.47	10.71	11.67	10.69	10.58
	2	9.14	9.46	13.62	14.57	11.61	10.56	5.17	8.57	6.48	9.89	10.73	3.65	6.22	6.65	8.75	2.87	10.35	5.91	7.16	9.18	5.05	9.61	4.27	7.99	4.13	11.33	11.68	12.52	7.27	8.16	8.76	8.31	12.01	11.06	9.28	14.09	13.42	6.83	10.29	9.39	12.9	8.99	16.31	12.85	10.67	12.51	10.43	11.03
7 dpf 10000 ng/L	1	6.37	9.48	11.01	12.6	10.33	7.9	5.08	7.48	6.45	9.11	8.42	2.7	4.47	4.9	7.03	2.74	5.71	4.2	5.22	7.47	4.51	9.1	4.04	7.37	4.6	10.72	12.35	10.88	6.26	6.25	6.78	7.06	14.94	9.63	15.33	11.68	12.71	4.51	9.67	6.26	9.15	7.29	12.73	13.68	7.33	10.62	9.77	11.12
	1	6.44	9.5	11.24	12.69	10.32	8.36	5.19	7.38	6.69	8.96	8.59	2.74	4.56	4.95	7	2.79	5.63	4.45	5.61	7.65	4.15	9.51	4.43	7.63	4.68	10.87	11.33	11.96	6.41	6.54	6.56	7.61	14.56	10.38	15.35	12.53	13.42	4.51	10.23	6.5	9.73	7.39	14.93	12.9	7.16	11.35	10.27	12.06
	1	6.36	9.24	10.78	12.97	10.49	8.24	5.05	7.34	6.68	8.81	8.2	2.78	4.62	5	7.24	2.98	5.79	4.43	5.63	7.65	4.33	9.02	4.51	7.83	4.88	10.47	12.23	11.47	6.39	6.59	6.64	6.87	16.59	9.76	14.52	10.94	12.66	4.72	10.01	6.22	9.27	7.6	14.81	13.85	7.04	10.65	9.7	12.05
	2	8.48	9.2	12.93	10.17	13.03	9.26	4.68	7.87	6.12	9.52	9.64	3.69	5.07	6.24	8.85	2.27	5.97	4.01	6.78	7.73	4.46	10.52	4.03	7.73	4.27	14.11	12.5	14.24	6.53	6.55	5.82	6.53	14.81	8.74	18.02	11.16	14.59	3.78	8.64	6.31	8.63	7.01	15.16	13.77	7.21	10.77	11.09	12.8
	2	8.28	8.52	12.73	10.26	13.58	8.81	4.32	7.29	5.74	9.39	10.04	3.42	5.04	5.87	8.3	2.4	6.04	4.29	6.52	8.06	4.54	10.58	4.49	7.9	4.36	13.59	14.58	14.93	6.66	6.99	5.95	6.87	14.21	8.84	17.07	11.06	13.88	3.79	8.84	6.31	8.46	7.17	14.58	14.26	8.15	10.7	11.44	12.44
	2	8.9	9.09	13.85	10.45	11.87	9.44	4.63	7.62	5.8	9.45	9.76	3.77	5.28	6.4	8.68	2.24	6.17	4.46	6.5	8.02	4.44	10.68	3.96	7.97	4.56	12.61	12.79	13.46	6.66	6.82	5.99	6.83	14.68	9.54	17.73	11.18	14.33	3.89	9.13	6.12	8.94	7	15.65	15.26	7.58	10.2	10.54	11.51
14 dpf 100 ng/L	1	7.12	9.4	11.69	14.4	13.29	9.22	3.66	6.89	7.04	9.13	8.82	2.67	4.26	5.25	6.18	1.48	4.91	3	3.79	5.6	4.04	7.6	2.23	8.4	4.92	12.64	10.63	13.1	6.39	5.53	8.11	8.08	18.12	14.03	14.49	12.76	14.08	8.39	11.09	9.59	10.63	10.2	17.84	16.71	9.88	10.05	10.45	11.14
	1	7.69	9.36	12.51	14.84	13.02	8.48	3.71	7.64	6.81	9.49	8.42	3.01	4.3	5.53	6.08	1.57	4.87	3.11	3.82	4.94	3.84	7.93	2.23	8.39	5.34	11.78	11.08	12.45	6.7	5.92	8.43	8.47	17.69	14.4	14.85	12.6	16.04	8.47	11.5	10.12	10.99	10.55	18	16.74	10.12	9.19	10.3	10.67
	1	7.62	10.49	11.16	14.9	13.91	9.08	4.16	7.34	6.98	9.82	8.33	3.1	4.19	5.53	6.1	1.42	5.04	3.33	4.07	4.96	3.83	7.36	2.97	8.42	4.75	11.32	10.64	11.86	6.5	5.46	8.56	8.6	19.36	14.33	13.51	13.94	15.07	8.9	11.53	10.22	10.97	10.63	18.46	17.36	10.38	9.15	9.84	10.32
	2	11.57	9.7	11.85	16.01	12.83	9.71	3.26	7.64	6.47	9.78	8.69	3.95	5.41	6.33	7.24	1.2	7.66	3.32	6.98	8.35	4.32	10.49	1.68	9.46	5.01	12.4	10.55	11.22	8.32	6.18	8.76	9.15	18.05	14.37	15.55	13.69	14.73	9.83	11.31	8.38	11.73	10.52	17.76	15.8	10.58	8.47	10.71	9.36
	2	12.31	10.47	10.9	15.72	12.71	10.87	3.72	7.27	7.07	10.57	9.87	3.5	5.65	6.54	7.15	0.9	8.18	3.88	7.78	8.83	4.82	10.19	1.88	9.07	4.97	12.54	10.64	11.92	8.95	6.65	8.93	8.95	17.72	13.42	15.02	14.32	15.97	9.52	11.45	8.51	11.13	10.8	18.39	15.8	11.04	8.77	11.17	9.51
	2	11.47	10.45	10.67	15.17	13.21	9.69	3.22	7.34	7.01	10.38	9.91	3.71	5.43	6.67	7.33	0.55	7.4	3.36	6.48	8.63	4.44	8.52	1.97	8.05	4.79	12.28	11.04	11.14	7.9	6.71	8.68	9.47	15.84	13.83	16.7	12.82	15.64	9.21	11.46	8.23	11.07	10.75	17.48	15.17	11.08	8.29	10.84	9.34
14 dpf 10000 ng/L	1	7.73	9.56	11.35	14.56	11.92	8.48	3.92	6.72	6.57	9.6	9.29	2.12	4.46	5.83	5.22	1.29	7.12	3.46	5.77	7.42	4.21	8.89	1.96	9.27	6	11.66	12.2	11.54	6.83	6.19	8.26	8.68	14.09	12.53	15.28	13.51	12.46	7.69	8.86	8.04	10.48	9.71	14.61	13.49	10.56	9.67	10.75	11.28
	1	8.03	10.9	11.7	14.89	11.7	8.97	4.51	7.24	7.43	10.58	8.91	2.41	4.66	5.71	5.81	0.87	6.91	3.1	5.61	6.95	3.96	8.34	1.35	8.05	5.1	11.64	11.48	11.81	6.49	5.7	8.76	9.25	13.74	12.35	15.26	13.44	11.36	7.44	9.43	8.84	9.99	10.08	14.76	16.9	12.32	10.52	10.25	10.92
	1	8.45	10.22	11.38	14.8	11.43	8.9	4.44	7.37	7.04	10.58	9.13	2.44	4.52	5.66	5.8	1.29	7	3.96	5.99	7.06	4.93	9.18	1.95	8.73	5.29	11.41	11.34	11.57	6.76	6.01	8.61	8.77	14.85	12.36	15.43	14.85	12.58	8.63	9.69	8.65	10.41	9.82	14.84	13.72	10.68	9.95	10.64	10.89
	2	10.57	10.89	13.05	14.49	12.54	10.27	4.22	8.18	7.15	11.43	11.19	4.16	5.56	7.23	7.74	1.15	7.56	3.79	5.94	7.16	4.4	8.86	2.71	8.82	5.54	11.16	12.69	13.74	7.08	7.29	8.2	9.84	13.92	13.11	15.73	13.61	12.02	8.56	8.68	8.54	9.7	10.46	13.94	14.9	10.35	9.31	10.81	10.48
	2	9.85	10.37	12.52	13.94	12.76	9.65	3.93	7.91	7.01	10.97	10.36	3.54	5.41	6.91	7.35	1.13	7.3	3.77	6.19	7.38	4.98	8.52	2.57	8.74	4.95	10.83	12.06	14.01	7.72	7.09	8.54	9.07	14.91	12.24	16.05	12.26	12.79	7.98	8.56	8.25	9.54	9.72	15.34	14.11	10.7	9.01	9.97	10.29
	2	9.71	10.72	12.17	15.31	12.65	10.06	4.19	8.08	7.18	11.86	11.04	3.75	5.53	7.08	7.58	1.68	6.7	3.93	6.43	7.7	4.49	9.06	2.23	8.75	5.08	11.15	14.05	13.15	7.72	7.27	8.52	9.67	14.42	11.88	15.85	11.88	12.25	8.22	8.85	8.54	9.99	10.86	15.04	17.1	9.5	9.92	10.44	11.87
[truncated: 25 more columns]

## Sheet: PLS-DA
	Gene	mpra	mprb	esr2a	esr2b	cyp19a1b	clock1a	clock1b	clock2	arntl1a	arntl1b	arntl2	nrld1	nrld2a	nrld2b	per1a	per1b	per2	per3	cry1a	cry1b	cry2a	cry2b	cry3	cry4	cry5	pgr	esr1	vtg1	ar	mr	gr	star	cyp11a1	cyp17a1	cyp19a1a	cyp11b	hsd3b	hsd20b	hsd17b3	hsd11b2	gnrh2	gnrh3	fshb	lhb	crh	pomc	trh	tshb
d2cl1	control group	8.48	10.27	10.27	9.07	10.91	7.26	9.02	8.76	7.32	10.31	12.1	13.92	14.99	11.33	11.16	6.94	7.84	13.94	7.97	12.14	13.46	9.52	5.67	11.05	7.37	10.64	9.58	14.6	9.66	10.7	6.94	7.84	13.94	7.97	16.05	13.46	9.52	5.67	11.05	7.37	10.64	9.58	18.22	17.59	10.7	12.21	14.68	11.45
d2cl2	control group	8.52	10.21	9.46	8.96	10.76	7.29	9.16	8.48	7.75	10.19	12.26	13.86	13.92	11.12	11.03	7.05	8.4	14.46	8.38	11.56	12.91	9.92	5.79	11.72	7.42	10.09	9.06	13.43	9.83	10.86	7.05	8.4	14.46	8.38	16.53	12.91	9.92	5.79	11.72	7.42	10.09	9.06	17.34	18.8	10.86	11.71	14.96	11.2
d2cl3	control group	8.47	11.02	9.95	8.86	10.79	7.26	8.92	9.36	7.27	10.2	12.61	14.01	13.9	11.39	10.95	7.3	8.24	14.72	8.48	11.66	13.31	10	6.04	11.57	7.42	10.91	9.24	13.52	9.67	11.59	7.3	8.24	14.72	8.48	17	13.31	10	6.04	11.57	7.42	10.91	9.24	18.44	16.29	11.59	11.54	14.47	10.89
d2l1	treatment group	7.43	9.18	8.68	8.93	11.33	6.55	8.96	7.6	6.62	9.73	12.84	16.27	13.77	10.31	10.86	7.1	7.71	12.42	8.87	11.58	10.12	8.68	5.76	11.22	6.84	9.65	8.3	13.09	10.87	10.47	7.1	7.71	12.42	8.87	15.84	10.12	8.68	5.76	11.22	6.84	9.65	8.3	16.53	16.28	10.47	11.15	14.46	10.86
d2l2	treatment group	8	9.85	9.51	9.82	11.43	7.08	10.26	8.28	7.01	9.29	12.07	16.6	15.2	11.33	12.33	7.68	8.47	14.98	9.07	11.09	10.63	9.33	6.31	12.22	7.85	9.64	8.68	14.39	11.42	10.85	7.68	8.47	14.98	9.07	13.58	10.63	9.33	6.31	12.22	7.85	9.64	8.68	16.3	15.67	10.85	11.54	14.82	11.02
d2l3	treatment group	7.89	9.87	9.13	9.61	11.36	6.78	9.6	8.03	6.76	9.54	12.42	16.56	13.46	10.96	10.89	7.51	8.43	13.21	8.69	11.19	10.76	8.86	6.07	11.73	7.42	10	9.32	15.16	11.27	10.32	7.51	8.43	13.21	8.69	14.83	10.76	8.86	6.07	11.73	7.42	10	9.32	15.01	14.76	10.32	11.63	15.29	10.38
d2ch1	control group	10.59	10.55	13.96	13.6	13.89	10.72	8.32	11.96	7.55	10.72	7.67	12.32	10.26	9.64	16.42	7.52	10.33	8.81	10.48	11.3	6.35	10.74	8.73	7.74	9.25	12.19	16.17	14.99	10.58	10.16	7.55	8.75	14.13	8.12	18.64	13.12	10.06	7.2	11.33	8.06	9.74	9.2	18.49	17.32	11.91	12.41	14.25	11.48
d2ch2	control group	10.36	10.69	14.63	12.84	13.93	10.89	7.97	12.09	7.13	10.46	8.05	12.17	9.58	8.99	17.13	7.9	10.43	8.76	10.46	11.41	6.52	9.65	8.65	7.97	9.87	11.96	13.71	14.55	10.87	10.64	7.95	9.41	15.07	8.62	18.25	13.29	10.32	6.86	12.29	8.37	10.29	9.37	17.63	18.35	12.37	13.07	14.38	11.74
d2ch3	control group	10.68	10.1	14.45	13.19	15.13	10.41	8.14	11.99	7.25	10.88	7.71	11.75	9.55	9.23	16.73	7.34	10.51	8.8	9.69	12.07	6.34	9.83	9.11	7.61	9	12.27	15.43	14.23	11.1	10.37	7.94	9.07	15.28	8.52	19.49	13.72	10.58	7.19	12.04	8.38	10.67	9.22	16.95	19.19	12.52	12.72	14.35	11.93
d2h1	treatment group	11.83	11.84	14.3	13.27	14.15	13.19	8.64	13.45	7.63	10.56	9.36	14.02	11.78	10.59	16.2	6.8	10.18	9.13	10.4	11.47	5.78	9.43	7.77	6.84	8.41	11.71	15.59	13.26	10.07	10	7.95	8.92	16.34	9.64	17.65	13.69	10.19	6.39	11.96	8.04	10.04	8.58	17.36	17.49	10.39	12.16	14.92	11.7
d2h2	treatment group	12.4	11.42	16.28	13.8	13.57	13.04	8.92	13.16	7.64	9.86	9.04	14.32	12.29	10.83	16.72	7.25	10.46	9.85	11.2	12.46	6.37	9.9	7.75	7.07	8.88	12.43	14.31	13.7	10.64	11.15	8.22	9.22	16.87	9.69	15.26	13.78	8.02	6.09	11.78	8.15	10.56	9.04	18.44	18.34	11.48	11.97	14.17	12.15
d2h3	treatment group	11.27	11.43	16.04	13.48	14.26	11.93	8.71	12.61	7.53	10.71	9.36	13.74	12.22	10.97	16.09	7.27	10.32	8.96	10.96	11.84	5.98	10.12	7.89	7.06	9.15	12.48	14.44	14.14	10.62	11.21	7.8	8.89	16.1	9.61	16.8	13.66	10.07	6.68	11.71	8.18	10.22	8.32	16.54	18.44	10.97	12.08	14.89	11.45
d7cl1	control group	10.64	9.87	15.44	15.63	12.28	10.52	5.03	8.92	6.66	10.85	10.97	4.91	7.06	7.46	9.64	3.84	9.48	4.54	5.11	6.63	4.57	10.83	5.14	7.52	5.39	13.84	12.09	12.9	7.35	6.62	8.46	9.04	12.64	9.53	12.9	12.55	13.18	6.73	10.57	9.64	11.68	9.74	16.15	13.02	10.76	12.62	12.38	11.11
d7cl2	control group	10.03	9.43	14.21	14.95	11.19	10.75	5.17	9.31	6.84	11.1	11.14	4.97	7.54	7.72	10.84	3.67	10.12	4.62	5.12	6.65	4.49	11.63	5.19	7.51	5.18	12.97	11.19	11.52	7.11	6.67	8.77	8.98	12.73	9.26	12.01	12.6	12.85	6.81	10.77	9.51	12.25	9.73	17.81	17.54	10.62	12.01	12.68	11.82
d7cl3	control group	10.43	9.81	14.71	14.64	13.33	10.92	5.14	9.41	6.63	11.05	10.77	4.95	7.49	8.32	10.06	3.71	9.99	4.64	5.19	6.67	4.48	11.11	5.25	7.42	5.83	13.04	11.98	11.4	6.97	6.54	8.93	8.95	11.05	9.23	10.86	11.7	13.45	7	10.42	9.57	12.29	9.73	17.71	14.6	10.29	12.62	12.58	11.55
d7l1	treatment group	9.4	9.08	13.83	14.82	11.62	10.21	4.98	8.63	6.74	10.19	10.55	3.66	5.79	7.56	8.77	2.81	10.15	5.35	6.96	9.73	5.12	11.07	4.41	8.12	4.23	10.98	11.96	13.18	7.59	7.9	9.68	8.91	12.79	11.64	11.6	13.92	12.84	6.93	10.57	9.56	12.6	9.14	15.91	17.74	10.63	13.28	11.12	10.94
d7l2	treatment group	9.98	10.39	13.28	15.18	11.58	9.92	5.17	8.76	6.66	9.92	10.19	3.84	6	6.68	8.76	2.82	10.36	5.36	7.68	9.13	5.14	10.04	4.25	8.2	4.18	12.61	11.61	12.95	7.83	8.11	8.98	8.55	13.03	11.62	10.93	13.63	13.66	6.73	10.87	9.87	12.54	9.2	16	15.47	10.71	11.67	10.69	10.58
d7l3	treatment group	9.14	9.46	13.62	14.57	11.61	10.56	5.17	8.57	6.48	9.89	10.73	3.65	6.22	6.65	8.75	2.87	10.35	5.91	7.16	9.18	5.05	9.61	4.27	7.99	4.13	11.33	11.68	12.52	7.27	8.16	8.76	8.31	12.01	11.06	9.28	14.09	13.42	6.83	10.29	9.39	12.9	8.99	16.31	12.85	10.67	12.51	10.43	11.03
d7ch1	control group	6.37	9.48	11.01	12.6	10.33	7.9	5.08	7.48	6.45	9.11	8.42	2.7	4.47	4.9	7.03	2.74	5.71	4.2	5.22	7.47	4.51	9.1	4.04	7.37	4.6	10.72	12.35	10.88	6.26	6.25	6.78	7.06	14.94	9.63	15.33	11.68	12.71	4.51	9.67	6.26	9.15	7.29	12.73	13.68	7.33	10.62	9.77	11.12
d7ch2	control group	6.44	9.5	11.24	12.69	10.32	8.36	5.19	7.38	6.69	8.96	8.59	2.74	4.56	4.95	7	2.79	5.63	4.45	5.61	7.65	4.15	9.51	4.43	7.63	4.68	10.87	11.33	11.96	6.41	6.54	6.56	7.61	14.56	10.38	15.35	12.53	13.42	4.51	10.23	6.5	9.73	7.39	14.93	12.9	7.16	11.35	10.27	12.06
d7ch3	control group	6.36	9.24	10.78	12.97	10.49	8.24	5.05	7.34	6.68	8.81	8.2	2.78	4.62	5	7.24	2.98	5.79	4.43	5.63	7.65	4.33	9.02	4.51	7.83	4.88	10.47	12.23	11.47	6.39	6.59	6.64	6.87	16.59	9.76	14.52	10.94	12.66	4.72	10.01	6.22	9.27	7.6	14.81	13.85	7.04	10.65	9.7	12.05
d7h1	treatment group	8.48	9.2	12.93	10.17	13.03	9.26	4.68	7.87	6.12	9.52	9.64	3.69	5.07	6.24	8.85	2.27	5.97	4.01	6.78	7.73	4.46	10.52	4.03	7.73	4.27	14.11	12.5	14.24	6.53	6.55	5.82	6.53	14.81	8.74	18.02	11.16	14.59	3.78	8.64	6.31	8.63	7.01	15.16	13.77	7.21	10.77	11.09	12.8
d7h2	treatment group	8.28	8.52	12.73	10.26	13.58	8.81	4.32	7.29	5.74	9.39	10.04	3.42	5.04	5.87	8.3	2.4	6.04	4.29	6.52	8.06	4.54	10.58	4.49	7.9	4.36	13.59	14.58	14.93	6.66	6.99	5.95	6.87	14.21	8.84	17.07	11.06	13.88	3.79	8.84	6.31	8.46	7.17	14.58	14.26	8.15	10.7	11.44	12.44
d7h3	treatment group	8.9	9.09	13.85	10.45	11.87	9.44	4.63	7.62	5.8	9.45	9.76	3.77	5.28	6.4	8.68	2.24	6.17	4.46	6.5	8.02	4.44	10.68	3.96	7.97	4.56	12.61	12.79	13.46	6.66	6.82	5.99	6.83	14.68	9.54	17.73	11.18	14.33	3.89	9.13	6.12	8.94	7	15.65	15.26	7.58	10.2	10.54	11.51
d14cl1	control group	7.12	9.4	11.69	14.4	13.29	9.22	3.66	6.89	7.04	9.13	8.82	2.67	4.26	5.25	6.18	1.48	4.91	3	3.79	5.6	4.04	7.6	2.23	8.4	4.92	12.64	10.63	13.1	6.39	5.53	8.11	8.08	18.12	14.03	14.49	12.76	14.08	8.39	11.09	9.59	10.63	10.2	17.84	16.71	9.88	10.05	10.45	11.14
d14cl2	control group	7.69	9.36	12.51	14.84	13.02	8.48	3.71	7.64	6.81	9.49	8.42	3.01	4.3	5.53	6.08	1.57	4.87	3.11	3.82	4.94	3.84	7.93	2.23	8.39	5.34	11.78	11.08	12.45	6.7	5.92	8.43	8.47	17.69	14.4	14.85	12.6	16.04	8.47	11.5	10.12	10.99	10.55	18	16.74	10.12	9.19	10.3	10.67
d14cl3	control group	7.62	10.49	11.16	14.9	13.91	9.08	4.16	7.34	6.98	9.82	8.33	3.1	4.19	5.53	6.1	1.42	5.04	3.33	4.07	4.96	3.83	7.36	2.97	8.42	4.75	11.32	10.64	11.86	6.5	5.46	8.56	8.6	19.36	14.33	13.51	13.94	15.07	8.9	11.53	10.22	10.97	10.63	18.46	17.36	10.38	9.15	9.84	10.32
d14l1	treatment group	11.57	9.7	11.85	16.01	12.83	9.71	3.26	7.64	6.47	9.78	8.69	3.95	5.41	6.33	7.24	1.2	7.66	3.32	6.98	8.35	4.32	10.49	1.68	9.46	5.01	12.4	10.55	11.22	8.32	6.18	8.76	9.15	18.05	14.37	15.55	13.69	14.73	9.83	11.31	8.38	11.73	10.52	17.76	15.8	10.58	8.47	10.71	9.36
d14l2	treatment group	12.31	10.47	10.9	15.72	12.71	10.87	3.72	7.27	7.07	10.57	9.87	3.5	5.65	6.54	7.15	0.9	8.18	3.88	7.78	8.83	4.82	10.19	1.88	9.07	4.97	12.54	10.64	11.92	8.95	6.65	8.93	8.95	17.72	13.42	15.02	14.32	15.97	9.52	11.45	8.51	11.13	10.8	18.39	15.8	11.04	8.77	11.17	9.51
d14l3	treatment group	11.47	10.45	10.67	15.17	13.21	9.69	3.22	7.34	7.01	10.38	9.91	3.71	5.43	6.67	7.33	0.55	7.4	3.36	6.48	8.63	4.44	8.52	1.97	8.05	4.79	12.28	11.04	11.14	7.9	6.71	8.68	9.47	15.84	13.83	16.7	12.82	15.64	9.21	11.46	8.23	11.07	10.75	17.48	15.17	11.08	8.29	10.84	9.34
d14ch1	control group	7.73	9.56	11.35	14.56	11.92	8.48	3.92	6.72	6.57	9.6	9.29	2.12	4.46	5.83	5.22	1.29	7.12	3.46	5.77	7.42	4.21	8.89	1.96	9.27	6	11.66	12.2	11.54	6.83	6.19	8.26	8.68	14.09	12.53	15.28	13.51	12.46	7.69	8.86	8.04	10.48	9.71	14.61	13.49	10.56	9.67	10.75	11.28
d14ch2	control group	8.03	10.9	11.7	14.89	11.7	8.97	4.51	7.24	7.43	10.58	8.91	2.41	4.66	5.71	5.81	0.87	6.91	3.1	5.61	6.95	3.96	8.34	1.35	8.05	5.1	11.64	11.48	11.81	6.49	5.7	8.76	9.25	13.74	12.35	15.26	13.44	11.36	7.44	9.43	8.84	9.99	10.08	14.76	16.9	12.32	10.52	10.25	10.92
d14ch3	control group	8.45	10.22	11.38	14.8	11.43	8.9	4.44	7.37	7.04	10.58	9.13	2.44	4.52	5.66	5.8	1.29	7	3.96	5.99	7.06	4.93	9.18	1.95	8.73	5.29	11.41	11.34	11.57	6.76	6.01	8.61	8.77	14.85	12.36	15.43	14.85	12.58	8.63	9.69	8.65	10.41	9.82	14.84	13.72	10.68	9.95	10.64	10.89
d14h1	treatment group	10.57	10.89	13.05	14.49	12.54	10.27	4.22	8.18	7.15	11.43	11.19	4.16	5.56	7.23	7.74	1.15	7.56	3.79	5.94	7.16	4.4	8.86	2.71	8.82	5.54	11.16	12.69	13.74	7.08	7.29	8.2	9.84	13.92	13.11	15.73	13.61	12.02	8.56	8.68	8.54	9.7	10.46	13.94	14.9	10.35	9.31	10.81	10.48
d14h2	treatment group	9.85	10.37	12.52	13.94	12.76	9.65	3.93	7.91	7.01	10.97	10.36	3.54	5.41	6.91	7.35	1.13	7.3	3.77	6.19	7.38	4.98	8.52	2.57	8.74	4.95	10.83	12.06	14.01	7.72	7.09	8.54	9.07	14.91	12.24	16.05	12.26	12.79	7.98	8.56	8.25	9.54	9.72	15.34	14.11	10.7	9.01	9.97	10.29
d14h3	treatment group	9.71	10.72	12.17	15.31	12.65	10.06	4.19	8.08	7.18	11.86	11.04	3.75	5.53	7.08	7.58	1.68	6.7	3.93	6.43	7.7	4.49	9.06	2.23	8.75	5.08	11.15	14.05	13.15	7.72	7.27	8.52	9.67	14.42	11.88	15.85	11.88	12.25	8.22	8.85	8.54	9.99	10.86	15.04	17.1	9.5	9.92	10.44	11.87
[truncated: 25 more columns]

## Sheet: VIP via PLS-DA
2 dpf 100 ng/L			2 dpf 10000 ng/L			7 dpf 100 ng/L			7 dpf 10000 ng/L			14 dpf 100 ng/L			14 dpf 10000 ng/L
Var ID (Primary)	M5.VIP[1]	2.57059 * M5.VIP[1]cvSE	Var ID (Primary)	M6.VIP[1]	2.57059 * M6.VIP[1]cvSE	Var ID (Primary)	M7.VIP[1]	2.57059 * M7.VIP[1]cvSE	Var ID (Primary)	M8.VIP[1]	2.57059 * M8.VIP[1]cvSE	Var ID (Primary)	M9.VIP[1]	2.57059 * M9.VIP[1]cvSE	Var ID (Primary)	M10.VIP[1]	2.57059 * M10.VIP[1]cvSE
cry2a	2.1749	0.48601	nr1d2a	2.09778	0.631638	cry1b	2.06156	0.473432	igf3	2.17581	0.732129	mpra	2.47348	0.248659	vtg1	1.92527	0.68973
cyp11b	2.1749	0.48601	clock1a	1.93073	0.708126	cry1a	1.82151	0.420595	piwil1	2.16078	1.05599	cry1b	2.20935	0.485147	per1a	1.91094	0.412069
nr1d1	2.11725	0.338668	nr1d1	1.92974	0.40377	cyp17	1.81017	0.407367	pgr	1.69369	0.52546	cry1a	2.10861	0.454061	mpra	1.89582	0.724665
igf3	1.95766	1.1962	cyp19a1a	1.88964	1.39853	trh	1.66851	0.397199	vtg1	1.68771	0.624769	per2	1.9939	0.300802	arntl2	1.7939	0.559941
fshb	1.77733	0.992998	nr1d2b	1.68992	0.642872	inos	1.55964	0.296426	fshr	1.6695	0.403533	piwil1	1.78449	1.30665	nr1d1	1.66413	0.447453
cc-chemokine	1.65472	0.547206	cyp11a1	1.67663	0.878255	cyp11b	1.53557	0.616075	esr2b	1.63887	0.182328	cry2b	1.6082	1.15011	il-1b	1.60326	0.316348
lhb	1.6357	1.68811	arntl2	1.6658	0.562022	mr	1.51202	0.177834	cyp19a1a	1.63297	0.575589	ar	1.58978	0.508656	nr1d2b	1.59654	0.24404
ar	1.58822	0.40115	cxcl-clc	1.65393	0.943675	pgr	1.46674	1.25734	cyp19a1b	1.57589	0.662606	hsd11b2	1.49215	0.629029	mr	1.52799	0.456414
il-1b	1.56803	0.670866	cyp17	1.53071	0.429591	nr1d2a	1.44223	0.428248	bcl2	1.55978	0.353625	cc-chemokine	1.45385	0.347836	hsd3b1	1.48492	1.00741
cyp19a1a	1.56655	1.37717	crh	1.5087	1.05972	per1a	1.42332	0.758791	mpra	1.53073	0.378925	nr1d2a	1.33217	0.164356	clock1a	1.47255	0.552136
ifn	1.50202	0.785564	mpra	1.49937	0.714657	cry5	1.40051	0.401313	esr2a	1.49849	0.648986	lhb	1.32979	0.758146	nis	1.39938	1.20346
tg	1.37227	0.336208	cc-chemokine	1.4566	1.10786	nr1d1	1.39365	0.235036	sox9b	1.43398	0.302133	tshb	1.32607	0.567266	esr2a	1.37678	0.788608
dio1	1.36837	0.284208	piwil1	1.4309	1.91955	sox9a	1.35244	0.619441	il-1b	1.36693	0.407444	cyp19a1a	1.26501	1.35189	fshr	1.37127	0.46258
cxcl-clc	1.3644	0.581528	mprb	1.42816	0.67675	esr2a	1.27175	0.972372	dmrt1	1.30208	0.784052	per1a	1.26464	0.339234	arntl1b	1.35262	1.00484
piwil1	1.22709	1.69518	cry3	1.39381	0.432925	bcl2	1.27046	0.469483	per1a	1.27494	0.369245	nr1d2b	1.2244	0.270565	nr1d2a	1.34664	0.15093
hsd3b1	1.21742	0.792649	clock2	1.37449	0.618682	dmrt1	1.26107	0.618182	ifn	1.26341	0.725305	inos	1.17927	1.03274	cyp11b	1.3447	1.58682
cry2b	1.14684	0.711747	thra	1.31912	0.5141	arntl1b	1.24358	0.263367	arntl2	1.22845	0.312213	igf3	1.15368	1.26801	cyp19a1b	1.33122	0.5384
hsd3b	1.14684	0.711747	il-1b	1.29747	1.20254	per1b	1.19712	0.265643	cry2b	1.21712	0.301955	clock1a	1.14895	0.921323	dio2	1.3282	0.873398
ucp2	1.14217	0.603099	esr2a	1.25806	1.53876	cry3	1.18054	0.105694	hsd3b	1.15049	0.594408	hsd20b	1.0923	0.670906	esr1	1.30212	1.45226
clock2	1.13156	0.858583	cry4	1.21048	0.495467	per3	1.17896	0.554496	cxcl-clc	1.14023	0.605516	vtg1	1.07255	1.07154	igf3	1.30203	1.08044
mprb	1.09435	0.938484	il-8	1.1976	1.1631	ifn	1.16113	0.962053	nr1d2b	1.13878	0.385066	pomc	1.06348	0.844594	clock2	1.28897	0.60905
arntl1b	1.08675	0.474339	vtg1	1.18267	0.949647	fshb	1.14977	1.14392	ucp2	1.10001	0.480788	mr	1.06063	0.512343	il-8	1.17969	0.16318
pgr	1.06836	0.77013	igf3	1.09857	1.35325	amh	1.11602	2.3551	cry1a	1.084	0.314246	esr2b	1.05596	0.778648	ar	1.16311	0.819846
gnrh2	1.06836	0.77013	hsd20b	1.08841	0.593697	cyp19a1a	1.11169	1.79056	hsd17b3	1.06056	0.47208	arntl2	1.01973	0.91326	piwil1	1.1223	2.01268
mpra	1.06662	0.615642	hsd3b1	1.0643	1.3345	sox9b	1.10316	0.404977	trh	1.02888	0.598132	nr1d1	1.01641	0.62808	cry3	1.09823	0.87093
esr2a	1.02798	0.955186	pomc	1.0589	0.71811	mpra	1.05616	0.894679	il-8	1.00672	0.43509	thrb	1.01343	0.874476	cxcl-clc	1.0783	0.241505
arntl1a	0.995583	0.71678	clock1b	1.05375	0.47622	ihcgr	1.03862	1.54557	clock1a	1.00009	0.53914	star	1.00977	0.654135	crh	1.07594	1.61874
cyp19a1b	0.979454	0.246897	ihcgr	1.01956	1.80729	cry2b	1.02465	1.15233	esr1	0.987839	1.25531	cyp11a1	0.987251	1.61523	amh	1.03034	1.02167
cry1a	0.945896	0.734465	gnrh3	0.996501	0.924858	nr1d2b	1.01416	0.942056	nr1d1	0.972806	0.30692	crh	0.984799	0.491092	cc-chemokine	1.0291	0.575389
cyp17	0.945896	0.734465	hsd3b	0.963144	1.68345	vtg1	1.00519	1.1652	cc-chemokine	0.923485	0.660998	thra	0.933106	0.497684	inos	1.01612	0.591495
thrb	0.929032	0.86103	cry1a	0.924682	1.12086	ucp2	0.990714	0.496011	hsd20b	0.904353	0.186123	trh	0.92571	0.653639	cyp19a1a	0.996469	0.498687
per3	0.831469	1.73921	per3	0.844412	0.907107	gnrh3	0.986389	0.25505	gr	0.890892	0.174426	arntl1b	0.922217	0.704151	hsd17b3	0.967892	0.946058
cyp11a1	0.831469	1.73921	cry5	0.839551	1.12056	cry4	0.98158	0.22423	cyp17	0.876066	0.757002	cry2a	0.889202	0.458086	pgr	0.94646	0.607641
clock1a	0.829811	0.616492	per1b	0.830217	0.891249	nis	0.972123	0.838125	arntl1a	0.858009	0.430617	per1b	0.857507	0.56578	star	0.938818	0.910308
cry1b	0.803797	0.83933	hsd11b3a	0.787736	0.562787	cry2a	0.964887	0.119047	sox9a	0.840124	0.562067	il-1b	0.839806	0.691497	ucp2	0.935766	0.205996
clock1b	0.780021	1.14869	sox9a	0.772385	0.939098	piwil1	0.936499	1.55771	lhb	0.838218	1.11245	cry3	0.837718	0.852277	gnrh2	0.923964	0.781136
esr1	0.758815	1.11137	ar	0.719756	0.971105	tshb	0.900338	0.728383	gnrh2	0.808857	0.590966	hsd11b3a	0.810945	0.64108	pomc	0.893015	1.23088
gnrh3	0.758815	1.11137	per1a	0.706874	1.13992	clock2	0.880045	0.496463	ihcgr	0.792116	1.42399	amh	0.796761	1.11059	sox9a	0.85472	0.494966
esr2b	0.75867	0.937157	cry2a	0.705352	0.888192	gnrh2	0.879846	0.805373	nr1d2a	0.781211	0.304532	tnfa	0.754926	0.727304	ifn	0.756425	0.860919
mr	0.744326	1.00762	nis	0.666345	1.72141	thrb	0.879364	0.967922	clock1b	0.754429	0.377044	gr	0.702211	0.512162	cry1a	0.752733	0.780308
crh	0.744326	1.00762	cyp11b	0.665766	0.807042	il-1b	0.873984	0.651953	fshb	0.753006	1.36978	dio1	0.695055	0.922901	bcl2	0.749273	0.105534
tshb	0.698439	0.947138	arntl1a	0.652461	0.650343	cxcl-clc	0.851831	1.08091	per1b	0.745947	0.296215	esr2a	0.6938	1.22195	sox9b	0.71875	0.286025
pomc	0.638026	0.981616	sox9b	0.652269	1.05543	hsd11b3a	0.799789	0.779569	arntl1b	0.711506	0.319534	ucp2	0.687927	0.106796	gnrh3	0.717712	1.12957
nr1d2b	0.637123	1.05493	ifn	0.617238	1.79179	tnfa	0.79728	0.847276	cyp11a1	0.676605	1.24388	clock1b	0.667828	0.87386	mprb	0.620823	1.30768
hsd11b3a	0.632582	0.82148	trh	0.604943	1.10277	clock1a	0.774313	0.726423	tg	0.671961	0.726271	cyp19a1b	0.664851	0.94023	thra	0.591892	0.895696
thra	0.631553	0.572307	mr	0.579026	1.36736	arntl2	0.761689	0.727224	hsd11b3a	0.653827	0.519956	gnrh2	0.660389	0.855482	per3	0.577876	1.03076
per1b	0.611887	0.858531	esr2b	0.547489	1.06798	il-8	0.744482	0.689448	nis	0.649893	0.992694	dio2	0.636765	1.04874	lhb	0.541976	2.51652
gr	0.611887	0.858531	amh	0.540379	1.71698	cyp19a1b	0.706705	1.4771	mprb	0.609645	0.674583	il-8	0.625026	0.500767	cry1b	0.52891	0.949687
dio2	0.592096	1.09857	arntl1b	0.537145	1.0811	ar	0.69872	0.702893	per2	0.594769	0.3294	pgr	0.613132	1.15351	hsd20b	0.497157	1.33948
il-8	0.515439	1.01369	cry1b	0.511205	1.29669	fshr	0.695801	1.18754	gnrh3	0.590103	0.403023	per3	0.600988	0.669983	hsd11b3a	0.489733	0.907176
sox9a	0.455617	1.00419	cyp19a1b	0.459675	1.44029	per2	0.6942	0.79751	cyp11b	0.585454	1.06905	cry4	0.559468	1.17461	thrb	0.482472	0.957549
amh	0.455497	1.30048	dio1	0.411309	1.55925	star	0.691117	0.678828	crh	0.572549	0.80915	mprb	0.545444	1.14029	cry5	0.450404	1.21914
cry3	0.42709	0.888567	hsd11b2	0.396167	0.692222	dio1	0.680605	0.712855	star	0.564042	0.735997	cyp17	0.541938	0.899395	tnfa	0.43543	1.34878
hsd20b	0.42709	0.888567	cry2b	0.395712	1.30377	cc-chemokine	0.63935	1.9016	cry1b	0.559581	0.456566	cyp11b	0.532878	1.40558	dio1	0.418855	0.867856
sox9b	0.425145	0.879947	gr	0.391442	0.865883	gr	0.612526	1.06503	cry5	0.534503	0.427355	ihcgr	0.522651	1.29607	cry2a	0.416647	1.2703
cry4	0.422395	1.2043	dio2	0.383573	1.18774	cyp11a1	0.51263	1.53149	ar	0.510162	0.288329	bcl2	0.510367	0.537683	clock1b	0.364929	0.991829
hsd17b3	0.422395	1.2043	inos	0.372677	1.03279	hsd3b1	0.410628	0.807132	tshb	0.503683	1.08533	gnrh3	0.441179	0.630702	per1b	0.338083	1.02321
per1a	0.41105	1.09635	esr1	0.348041	1.78557	dio2	0.340275	1.06199	mr	0.501525	0.588884	hsd3b1	0.439671	1.83748	per2	0.329776	1.13088
vtg1	0.398557	1.70305	bcl2	0.346199	1.01064	esr2b	0.322832	1.15389	dio2	0.446676	0.734381	nis	0.422542	1.08712	hsd3b	0.317053	1.1197
inos	0.297589	1.46874	per2	0.310402	0.680315	thra	0.306197	0.833159	cry4	0.427324	0.58415	hsd3b	0.3874	1.48231	ihcgr	0.291964	1.07442
tnfa	0.297544	1.65803	fshb	0.284921	1.43614	tg	0.291198	0.543803	hsd3b1	0.410204	1.32561	fshb	0.321947	1.13231	cyp11a1	0.279462	1.4163
trh	0.267909	0.98232	lhb	0.246521	1.20832	crh	0.259211	0.710802	pomc	0.403792	0.890492	cxcl-clc	0.293893	0.666506	gr	0.274308	0.933366
arntl2	0.214957	0.930806	tg	0.245903	1.10873	hsd3b	0.235873	1.09034	clock2	0.321863	0.663275	tg	0.262401	1.15895	esr2b	0.257769	1.12334
bcl2	0.204997	0.956992	thrb	0.19931	0.629904	arntl1a	0.224886	0.617576	thrb	0.315764	1.02208	fshr	0.226869	0.745057	trh	0.252944	1.01193
nr1d2a	0.147831	1.06097	star	0.140967	0.780803	lhb	0.192054	1.68376	cry2a	0.3063	0.513967	clock2	0.213085	0.790899	tshb	0.204302	1.39392
ihcgr	0.134449	1.43366	ucp2	0.132668	0.930249	igf3	0.153396	0.81219	amh	0.281983	1.20455	sox9b	0.212454	0.798595	arntl1a	0.192821	0.713279
dmrt1	0.106206	0.900236	pgr	0.127892	0.939947	pomc	0.0875694	0.800115	cry3	0.254334	0.780221	ifn	0.21167	1.00227	tg	0.171068	0.554933
per2	0.0745379	0.623519	hsd17b3	0.127029	0.967413	mprb	0.0832106	1.00339	tnfa	0.220319	1.17866	arntl1a	0.173361	0.558645	cry4	0.142425	0.803069
star	0.0745379	0.623519	dmrt1	0.104092	1.20018	hsd11b2	0.0777262	0.460781	dio1	0.19672	0.884456	cry5	0.154654	0.528948	hsd11b2	0.127776	0.903245
nis	0.0591967	0.588608	tshb	0.100436	0.494545	hsd20b	0.0472443	0.26452	per3	0.195972	0.639322	sox9a	0.0857847	0.679483	fshb	0.0547847	1.02966
cry5	0.0578276	0.7598	gnrh2	0.0712202	0.569126	clock1b	0.0215223	0.248116	hsd11b2	0.174752	0.545547	esr1	0.0735591	0.523813	cry2b	0.0181429	0.607679
hsd11b2	0.0578276	0.7598	fshr	0.0630929	0.688769	hsd17b3	0.0201621	0.501913	inos	0.0927291	0.550811	hsd17b3	0.0727193	0.406469	dmrt1	0.0166527	0.772679
fshr	0.0204994	1.32544	tnfa	0.0414225	0.775237	esr1	0.0054028	0.596493	thra	0.0728585	0.720192	dmrt1	0.0474004	0.380877	cyp17	0.00537898	0.927735

## Sheet: Pearson correlation
index	Gene	2 dpf 100	2 dpf 10000	7 dpf 100	7 dpf 10000	14 dpf 100	14 dpf 10000
		Fold Change（2‒ΔΔCt-A）	Fold Change	Fold Change	Fold Change	Fold Change	Fold Change
CRS	cyp19a1a	4.46147	5.46135	2.52201	0.18886	0.401011	0.684273
	cyp19a1b	0.683183	1.31539	1.87919	0.214166	1.4194	0.512679
	cyp17a1	0.673426	0.431589	0.235901	1.97528	1.34838	1.06398
	cyp11b	6.94639	0.809369	0.355795	1.68364	0.769274	2.86379
	index(FC/4)	3.19112	2.00443	1.24822	1.01549	0.984516	1.28118
HRS	hsd20b	0.872105	1.62751	1.01754	1.6945	0.531737	0.80441
	hsd17b3	0.830325	1.10908	1.00911	2.16773	0.978273	1.5528
	hsd11b2	1.06206	1.10913	0.989689	1.05949	3.04803	1.05211
	hsd3b1	2.05641	1.90636	0.872478	0.788896	2.036	2.60812
	index(FC/4)	1.20523	1.43802	0.972204	1.42765	1.64851	1.50436
GFL	gnrh2	1.74376	1.00254	0.667203	1.70086	0.748729	1.47613
	gnrh3	1.5586	1.55332	1.54327	1.29822	0.855736	0.75913
	fshβ	5.35355	1.36255	2.44214	0.672923	1.20684	1.06856
	lhβ	4.70721	1.19253	2.53347	0.568472	2.60004	0.857065
	index(FC/4)	3.34078	1.27773	1.79652	1.06012	1.35284	1.04022
ER	esr1	1.5586	1.38026	1.02429	0.561555	1.03901	0.483902
	esr2a	1.91395	0.480284	2.36218	0.246449	1.65813	0.479887
	esr2b	0.749154	0.862991	1.21852	5.50456	0.544476	1.20966
	vtg1	1.22767	2.06138	0.551605	0.15892	2.11884	0.259272
	index(FC/4)	1.36234	1.19623	1.28915	1.61787	1.34011	0.608181
PGR	pgr	1.74376	0.993748	3.9384	0.158015	0.712305	1.4456
	gr	0.801913	0.896361	0.806293	1.68025	0.747628	1.09577
	index(FC/2)	1.27283	0.945055	2.37234	0.91913	0.729967	1.27068
SD	sox9a	1.25616	1.40782	0.445673	1.68102	1.05866	0.748407
	ar	0.364772	1.33054	0.755365	0.833179	0.28764	0.582194
	index(FC/2)	0.810467	1.36918	0.600519	1.2571	0.673149	0.6653
OM	mprα	1.66644	0.443626	1.94751	0.227637	0.0521504	0.262939
	hsd20b	0.872105	1.62751	1.01754	1.6945	0.531737	0.80441
	igf3	6.83122	2.17773	1.1426	0.0501659	2.78232	0.47889
	index(FC/3)	3.12326	1.41629	1.36922	0.657435	1.12207	0.515413
CR	clock1a	1.39575	0.251497	1.43361	0.518967	0.476724	0.439332
	arntl2	0.960089	0.377348	1.43264	0.378152	0.555515	0.306464
	nr1d1	0.172195	0.261613	2.3431	0.543707	0.581688	0.360744
	nr1d2a	1.36596	0.219548	2.57706	0.66987	0.422598	0.516964
	nr1d2b	1.41323	0.365441	2.05714	0.434153	0.476381	0.396648
	per1a	0.893245	1.35058	2.84505	0.352638	0.460691	0.261027
	per1b	0.801913	1.42202	1.87819	1.45523	1.54881	0.902171
	cry1a	0.673426	0.690139	0.234074	0.472828	0.117263	0.766941
	cry1b	1.41483	0.848215	0.157143	0.787165	0.0932247	0.83903
	index(FC/9)	1.01007	0.642934	1.662	0.623634	0.525877	0.532147
OS	bcl2	0.948198	1.12895	0.482909	4.78697	1.18409	0.814301
	ucp2	1.81745	0.979281	0.631393	2.27524	1.26317	0.724513
	index(FC/2)	1.38282	1.05411	0.557151	3.53111	1.22363	0.769407
IM	il-1β	0.370971	0.477859	0.684653	3.40785	1.5558	2.54905
	il-8	1.23534	0.536578	0.738274	2.02226	1.29335	0.601308
	cxcl-clc	2.30432	0.376295	0.651262	2.47991	1.10396	1.5304
	cc-chemokine	3.1289	0.421226	0.975981	1.88953	0.353365	0.657953
	index(FC/4)	1.75988	0.45299	0.762543	2.44989	1.07662	1.33468

## Sheet: LC-MS
Sample Name	Sample Type	File Name	Analyte Peak Area (counts)	Analyte Peak Height (cps)	Analyte Concentration (ng/mL)	Standard Query Status	IS Peak Area (counts)	IS Peak Height (cps)	Use Record	Record Modified	Calculated Concentration (ng/mL)	Concentration (ng/mL)	Measured water sample Concentration (ng/mL)	Aver.(ng/mL)
Cal_1ppb	Standard	20180328_CBZ_Positive.wiff	20400	2700	1	N/A	933000	124000	1	0	1.31
Cal_5ppb	Standard	20180328_CBZ_Positive.wiff	82700	11100	5	N/A	924000	124000	1	0	5.38
Cal_10ppb	Standard	20180328_CBZ_Positive.wiff	158000	21300	10	N/A	906000	122000	1	0	10.5
Cal_50ppb	Standard	20180328_CBZ_Positive.wiff	757000	100000	50	N/A	905000	122000	1	0	50.2
Cal_100ppb	Standard	20180328_CBZ_Positive.wiff	1530000	203000	100	N/A	899000	120000	1	0	102
Cal_200ppb	Standard	20180328_CBZ_Positive.wiff	2890000	373000	200	N/A	874000	114000	1	0	199
0h-DMSO-1	Unknown	20180328_CBZ_Positive.wiff	4930	577	N/A	N/A	3050000	391000		0	0.0971	0.1942	0.001942
0h-DMSO-2	Unknown	20180328_CBZ_Positive.wiff	5880	762	N/A	N/A	2900000	361000		0	0.122	0.244	0.00244
0h-L-1	Unknown	20180328_CBZ_Positive.wiff	240000	31600	N/A	N/A	3010000	383000		0	4.79	9.58	0.0958	0.0961
0h-L-2	Unknown	20180328_CBZ_Positive.wiff	256000	33600	N/A	N/A	3190000	399000		0	4.82	9.64	0.0964
0h-MH-1	Unknown	20180328_CBZ_Positive.wiff	13600000	1530000	N/A	N/A	2020000	250000		0	404	808	8.08	8.08
0h-MH-2	Unknown	20180328_CBZ_Positive.wiff	14800000	1600000	N/A	N/A	2200000	272000		0	404	808	8.08
1d-DMSO-1	Unknown	20180328_CBZ_Positive.wiff	17900	2070	N/A	N/A	3120000	402000		0	0.344	0.688	0.00688
1d-DMSO-2	Unknown	20180328_CBZ_Positive.wiff	8960	930	N/A	N/A	2920000	366000		0	0.184	0.368	0.00368
1d-L-2	Unknown	20180328_CBZ_Positive.wiff	261000	34200	N/A	N/A	3190000	397000		0	4.92	9.84	0.0984	0.0968
1d-L-3	Unknown	20180328_CBZ_Positive.wiff	231000	30600	N/A	N/A	2920000	370000		0	4.76	9.52	0.0952
1d-MH-2	Unknown	20180328_CBZ_Positive.wiff	15200000	1640000	N/A	N/A	2070000	255000		0	443	886	8.86	8.82
1d-MH-3	Unknown	20180328_CBZ_Positive.wiff	16800000	1720000	N/A	N/A	2290000	282000		0	439	878	8.78
For recovery test
Sample Name	Sample Type	File Name	Analyte Peak Area (counts)	Analyte Peak Height (cps)	Analyte Concentration (ng/mL)	Standard Query Status	IS Peak Area (counts)	IS Peak Height (cps)	Use Record	Record Modified	Calculated Concentration (ng/mL)	Concentration (ng/mL)	Measured water sample Concentration (ng/mL)	Nominal concentration of water (ng/ml)	Recovery (%)
0h-L-1	Unknown	20180328_CBZ_Positive.wiff	240000	31600	N/A	N/A	3010000	383000		0	4.79	9.58	0.0958	0.1	95.8
0h-L-2	Unknown	20180328_CBZ_Positive.wiff	256000	33600	N/A	N/A	3190000	399000		0	4.82	9.64	0.0964	0.1	96.4
Aver.															96.1
For MDL and MQL
	Measured concentration (ng/ml)	S/N	MDL(ng/ml)	MQL (ng/ml)
0h-L-1	0.0958	115	0.00249913	0.00833043
